# Supplementary material for: Detecting rare diseases in electronic health records using machine learning and knowledge engineering: Case study of acute hepatic porphyria
Source: PubMed Central journal article supplement (PMC7331997; doi:10.1371/journal.pone.0235574), 2020-07-02

# PLOS ONE

## Detecting Rare Diseases in Electronic Health Records Using Machine Learning and Knowledge Engineering: Case Study of Acute Hepatic Porphyria

--Manuscript Draft--

|                              |                                                                                                                                                                                                                                                                                                                                                                                                                                                                                                                                                                                                                                                                                                                                                                                                                                                                                                                                                                                                                                                                                                                                                                                                                                                                                                                                                                                                                                                                                                                                                                                                                                                                                                                                                                                                                                                                                                                                                                                                                                                                                                                                                                                                                                                                                                                                                                                                                                                                                                                                                                                                                                                                                                                                                                                                                                                                                                                                                                                                                                                                                                                                                                                                                                                                                                                               |
|------------------------------|-------------------------------------------------------------------------------------------------------------------------------------------------------------------------------------------------------------------------------------------------------------------------------------------------------------------------------------------------------------------------------------------------------------------------------------------------------------------------------------------------------------------------------------------------------------------------------------------------------------------------------------------------------------------------------------------------------------------------------------------------------------------------------------------------------------------------------------------------------------------------------------------------------------------------------------------------------------------------------------------------------------------------------------------------------------------------------------------------------------------------------------------------------------------------------------------------------------------------------------------------------------------------------------------------------------------------------------------------------------------------------------------------------------------------------------------------------------------------------------------------------------------------------------------------------------------------------------------------------------------------------------------------------------------------------------------------------------------------------------------------------------------------------------------------------------------------------------------------------------------------------------------------------------------------------------------------------------------------------------------------------------------------------------------------------------------------------------------------------------------------------------------------------------------------------------------------------------------------------------------------------------------------------------------------------------------------------------------------------------------------------------------------------------------------------------------------------------------------------------------------------------------------------------------------------------------------------------------------------------------------------------------------------------------------------------------------------------------------------------------------------------------------------------------------------------------------------------------------------------------------------------------------------------------------------------------------------------------------------------------------------------------------------------------------------------------------------------------------------------------------------------------------------------------------------------------------------------------------------------------------------------------------------------------------------------------------------|
| <b>Manuscript Number:</b>    | PONE-D-20-10338R1                                                                                                                                                                                                                                                                                                                                                                                                                                                                                                                                                                                                                                                                                                                                                                                                                                                                                                                                                                                                                                                                                                                                                                                                                                                                                                                                                                                                                                                                                                                                                                                                                                                                                                                                                                                                                                                                                                                                                                                                                                                                                                                                                                                                                                                                                                                                                                                                                                                                                                                                                                                                                                                                                                                                                                                                                                                                                                                                                                                                                                                                                                                                                                                                                                                                                                             |
| <b>Article Type:</b>         | Research Article                                                                                                                                                                                                                                                                                                                                                                                                                                                                                                                                                                                                                                                                                                                                                                                                                                                                                                                                                                                                                                                                                                                                                                                                                                                                                                                                                                                                                                                                                                                                                                                                                                                                                                                                                                                                                                                                                                                                                                                                                                                                                                                                                                                                                                                                                                                                                                                                                                                                                                                                                                                                                                                                                                                                                                                                                                                                                                                                                                                                                                                                                                                                                                                                                                                                                                              |
| <b>Full Title:</b>           | Detecting Rare Diseases in Electronic Health Records Using Machine Learning and Knowledge Engineering: Case Study of Acute Hepatic Porphyria                                                                                                                                                                                                                                                                                                                                                                                                                                                                                                                                                                                                                                                                                                                                                                                                                                                                                                                                                                                                                                                                                                                                                                                                                                                                                                                                                                                                                                                                                                                                                                                                                                                                                                                                                                                                                                                                                                                                                                                                                                                                                                                                                                                                                                                                                                                                                                                                                                                                                                                                                                                                                                                                                                                                                                                                                                                                                                                                                                                                                                                                                                                                                                                  |
| <b>Short Title:</b>          | Detecting Rare Diseases Using Machine Learning on EHR Data: Case Study of Acute Hepatic Porphyria                                                                                                                                                                                                                                                                                                                                                                                                                                                                                                                                                                                                                                                                                                                                                                                                                                                                                                                                                                                                                                                                                                                                                                                                                                                                                                                                                                                                                                                                                                                                                                                                                                                                                                                                                                                                                                                                                                                                                                                                                                                                                                                                                                                                                                                                                                                                                                                                                                                                                                                                                                                                                                                                                                                                                                                                                                                                                                                                                                                                                                                                                                                                                                                                                             |
| <b>Corresponding Author:</b> | Aaron M. Cohen, M.D.<br>Oregon Health & Science University<br>Portland, OR UNITED STATES                                                                                                                                                                                                                                                                                                                                                                                                                                                                                                                                                                                                                                                                                                                                                                                                                                                                                                                                                                                                                                                                                                                                                                                                                                                                                                                                                                                                                                                                                                                                                                                                                                                                                                                                                                                                                                                                                                                                                                                                                                                                                                                                                                                                                                                                                                                                                                                                                                                                                                                                                                                                                                                                                                                                                                                                                                                                                                                                                                                                                                                                                                                                                                                                                                      |
| <b>Keywords:</b>             | rare diseases; Acute Hepatic Porphyria; machine learning; Data Science; electronic health record                                                                                                                                                                                                                                                                                                                                                                                                                                                                                                                                                                                                                                                                                                                                                                                                                                                                                                                                                                                                                                                                                                                                                                                                                                                                                                                                                                                                                                                                                                                                                                                                                                                                                                                                                                                                                                                                                                                                                                                                                                                                                                                                                                                                                                                                                                                                                                                                                                                                                                                                                                                                                                                                                                                                                                                                                                                                                                                                                                                                                                                                                                                                                                                                                              |
| <b>Abstract:</b>             | <p><b>Background:</b> With the growing adoption of the electronic health record (EHR) worldwide over the last decade, new opportunities exist for leveraging EHR data for detection of rare diseases. Rare diseases are often not diagnosed or delayed in diagnosis by clinicians who encounter them infrequently. One such rare disease that may be amenable to EHR-based detection is acute hepatic porphyria (AHP). AHP consists of a family of rare, metabolic diseases characterized by potentially life-threatening acute attacks and, for some patients, chronic debilitating symptoms that negatively impact daily functioning and quality of life. The goal of this study was to apply machine learning and knowledge engineering to a large extract of EHR data to determine whether they could be effective in identifying patients not previously tested for AHP who should receive a proper diagnostic workup for AHP.</p> <p><b>Methods and Findings:</b> We used an extract of the complete EHR data of 200,000 patients from an academic medical center for up to 10 years longitudinally and enriched it with records from an additional 5,571 patients from the center containing any mention of porphyria in notes, laboratory tests, diagnosis codes, and other parts of the record. After manually reviewing all patients with the ICD-10-CM code E80.21 (Acute intermittent [hepatic] porphyria), we identified 30 patients who were positive cases for our machine learning models, with the rest of the patients used as negative cases. We parsed the record into features, which were scored by frequency of appearance and labeled by the EHR source document. We then carried out a univariate feature analysis, manually choosing features not directly tied to provider attributes or suspicion of the patient having AHP. We next trained on the full dataset, with the best cross-validation performance coming from support vector machine (SVM) algorithm using a radial basis function (RBF) kernel. The trained model was applied back to the full data set and patients were ranked by margin distance. The top 100 ranked negative cases were manually reviewed for symptom complexes similar to AHP, finding four patients where AHP diagnostic testing was likely indicated and 18 patients where AHP diagnostic testing was possibly indicated. From the top 100 ranked cases of patients with mention of porphyria in their record, we identified four patients for whom AHP diagnostic testing was possibly indicated and had not been previously performed. Based solely on the reported prevalence of AHP, we would have expected only 0.002 cases out of the 200 patients manually reviewed.</p> <p><b>Conclusions:</b> The application of machine learning and knowledge engineering to EHR data may facilitate the diagnosis of rare diseases such as AHP. The only manual modifications to this work were the removal of disease-specific or medical center specific features that might undermine our ability to find new cases. Further work will recommend clinical investigation to identified patients' clinicians, evaluate more patients, assess additional feature selection and machine learning algorithms, and apply this methodology to other rare diseases.</p> |
| <b>Order of Authors:</b>     | Aaron M. Cohen, M.D.<br>Steven Chamberlin                                                                                                                                                                                                                                                                                                                                                                                                                                                                                                                                                                                                                                                                                                                                                                                                                                                                                                                                                                                                                                                                                                                                                                                                                                                                                                                                                                                                                                                                                                                                                                                                                                                                                                                                                                                                                                                                                                                                                                                                                                                                                                                                                                                                                                                                                                                                                                                                                                                                                                                                                                                                                                                                                                                                                                                                                                                                                                                                                                                                                                                                                                                                                                                                                                                                                     |

|                               |                                                                                                                                                                                                                                                                                                                                                                                                                                                                                                                                                                                                                                                                                                                                                                                                                                                                                                                                                                                                                                                                                                                                                                                                                                                                                                                                                                                                                                                                                                                                                                                                                                                                                                                                                                                                                                                                                                                                                                                                                                                                                                                                                                                                                                                                                                                                                                                                                                                                                                                                                                                                                                                                                                                                                                                                                                                                                                                                         |
|-------------------------------|-----------------------------------------------------------------------------------------------------------------------------------------------------------------------------------------------------------------------------------------------------------------------------------------------------------------------------------------------------------------------------------------------------------------------------------------------------------------------------------------------------------------------------------------------------------------------------------------------------------------------------------------------------------------------------------------------------------------------------------------------------------------------------------------------------------------------------------------------------------------------------------------------------------------------------------------------------------------------------------------------------------------------------------------------------------------------------------------------------------------------------------------------------------------------------------------------------------------------------------------------------------------------------------------------------------------------------------------------------------------------------------------------------------------------------------------------------------------------------------------------------------------------------------------------------------------------------------------------------------------------------------------------------------------------------------------------------------------------------------------------------------------------------------------------------------------------------------------------------------------------------------------------------------------------------------------------------------------------------------------------------------------------------------------------------------------------------------------------------------------------------------------------------------------------------------------------------------------------------------------------------------------------------------------------------------------------------------------------------------------------------------------------------------------------------------------------------------------------------------------------------------------------------------------------------------------------------------------------------------------------------------------------------------------------------------------------------------------------------------------------------------------------------------------------------------------------------------------------------------------------------------------------------------------------------------------|
|                               | Thomas Deloughery                                                                                                                                                                                                                                                                                                                                                                                                                                                                                                                                                                                                                                                                                                                                                                                                                                                                                                                                                                                                                                                                                                                                                                                                                                                                                                                                                                                                                                                                                                                                                                                                                                                                                                                                                                                                                                                                                                                                                                                                                                                                                                                                                                                                                                                                                                                                                                                                                                                                                                                                                                                                                                                                                                                                                                                                                                                                                                                       |
|                               | Michelle Nguyen                                                                                                                                                                                                                                                                                                                                                                                                                                                                                                                                                                                                                                                                                                                                                                                                                                                                                                                                                                                                                                                                                                                                                                                                                                                                                                                                                                                                                                                                                                                                                                                                                                                                                                                                                                                                                                                                                                                                                                                                                                                                                                                                                                                                                                                                                                                                                                                                                                                                                                                                                                                                                                                                                                                                                                                                                                                                                                                         |
|                               | Steven Bedrick                                                                                                                                                                                                                                                                                                                                                                                                                                                                                                                                                                                                                                                                                                                                                                                                                                                                                                                                                                                                                                                                                                                                                                                                                                                                                                                                                                                                                                                                                                                                                                                                                                                                                                                                                                                                                                                                                                                                                                                                                                                                                                                                                                                                                                                                                                                                                                                                                                                                                                                                                                                                                                                                                                                                                                                                                                                                                                                          |
|                               | Stephen Meninger                                                                                                                                                                                                                                                                                                                                                                                                                                                                                                                                                                                                                                                                                                                                                                                                                                                                                                                                                                                                                                                                                                                                                                                                                                                                                                                                                                                                                                                                                                                                                                                                                                                                                                                                                                                                                                                                                                                                                                                                                                                                                                                                                                                                                                                                                                                                                                                                                                                                                                                                                                                                                                                                                                                                                                                                                                                                                                                        |
|                               | John J. Ko                                                                                                                                                                                                                                                                                                                                                                                                                                                                                                                                                                                                                                                                                                                                                                                                                                                                                                                                                                                                                                                                                                                                                                                                                                                                                                                                                                                                                                                                                                                                                                                                                                                                                                                                                                                                                                                                                                                                                                                                                                                                                                                                                                                                                                                                                                                                                                                                                                                                                                                                                                                                                                                                                                                                                                                                                                                                                                                              |
|                               | Jigar J. Amin                                                                                                                                                                                                                                                                                                                                                                                                                                                                                                                                                                                                                                                                                                                                                                                                                                                                                                                                                                                                                                                                                                                                                                                                                                                                                                                                                                                                                                                                                                                                                                                                                                                                                                                                                                                                                                                                                                                                                                                                                                                                                                                                                                                                                                                                                                                                                                                                                                                                                                                                                                                                                                                                                                                                                                                                                                                                                                                           |
|                               | Alex J. Wei                                                                                                                                                                                                                                                                                                                                                                                                                                                                                                                                                                                                                                                                                                                                                                                                                                                                                                                                                                                                                                                                                                                                                                                                                                                                                                                                                                                                                                                                                                                                                                                                                                                                                                                                                                                                                                                                                                                                                                                                                                                                                                                                                                                                                                                                                                                                                                                                                                                                                                                                                                                                                                                                                                                                                                                                                                                                                                                             |
|                               | William Hersh                                                                                                                                                                                                                                                                                                                                                                                                                                                                                                                                                                                                                                                                                                                                                                                                                                                                                                                                                                                                                                                                                                                                                                                                                                                                                                                                                                                                                                                                                                                                                                                                                                                                                                                                                                                                                                                                                                                                                                                                                                                                                                                                                                                                                                                                                                                                                                                                                                                                                                                                                                                                                                                                                                                                                                                                                                                                                                                           |
| <b>Response to Reviewers:</b> | <p>Reviewer comments and our responses are given in our response letter and more conveniently formatted than are shown here.</p> <p>While this is important background it is not clear if this paragraph is needed in the paper, other than noting the diagnostic/prognostics should rely on biomarker and other lab tests rather than family history. Consider removing, or condensing.</p> <p>This paragraph of text is important to provide the patient disease context for our work, and provides additional clinical and genetic background to orient readers who may not have expertise about this disease, such as informaticians and machine learning researchers. The difficult diagnosis of AHP is in part due to the disease low penetrance and inconsistent appearances in families even though AHP and related diseases are mostly autosomal dominant. We therefore would like to keep the paragraph that is there now, as it really does not substantially lengthen the paper.</p> <p>Recommend adding the number of patients with ICD-10 code E80.21.<br/>This has been done.</p> <p>Unique patients, or unique records/document counts? And if document counts, is this the number of unique documents with a specific code? Please clarify.<br/>Total number of EHR records? Please clarify.<br/>We have modified the table and caption to make these points clear.</p> <p>This section is better-suited under the methods section below. Please update.<br/>Moved as requested.</p> <p>What is the start date of the data pull? How historical is the cohort?<br/>This information has been added.</p> <p>Typo? This sentence is a little confusing. Consider revising to "... adequate sample size to make predictive models robust..."<br/>Revised as suggested.</p> <p>Was this a wildcard text search? Please clarify<br/>These are wildcard search terms, clarified in the text as requested.</p> <p>You state "high likelihood" but below you note the chart review looked for a positive confirmation of AHP. It sounds like you are in fact confirming AHP through manual chart review.<br/>This is correct. Thank you for identifying this confusion. We have revised the text to: To develop a gold standard for the data, a medical student (MN), overseen by clinical experts among the rest of the authors, conducted a chart review to identify patients with a confirmed diagnosis of AHP.</p> <p>The remaining 17 records? Please specify.<br/>Added clarifying text:<br/>For the remaining 17 records, we could not confirm by chart review the diagnosis of AHP. This may be due to the code being attached to the patient based on an encounter to rule out AHP, or a charting error. For these 17 patients no additional information supporting the AHP diagnosis was found in the notes, clinical tests or medication records and the only evidence of AHP was a code in the problem list or</p> |

encounter diagnosis.

Results, not methods

Results of model building, not methods.

The corresponding text has been moved to the results section, and the results section reorganized to incorporate the new text.

Model? Spelling?

Thank you for finding this error. Changed word to "algorithm".

What is a source document? The location the field is derived in the EHR? Wouldn't that location depend on the underlying EHR structure? And why is the source document location important?

Yes, the source document is dependent upon the underlying structure of the EHR, and of our data warehouse as well. As the EHR itself is a hierarchical patient-oriented database, and our RDW is a relational database extract of that, we have no choice but to treat the records in units corresponding to the structure of the extract. These mappings between the EHR that clinicians use and the data extracts available to investigators is a common situation. The source document types correspond to units of observation common in documenting clinical care electronically. Our feature set provides both the source document and specific data field used in the model in order to provide as much information as possible to anyone trying to repeat our work and perform a similar mapping with their own EHR data. We have tried to make this more clear both in the descriptions, tables, and supplementary data.

There is no mention of constructing a training dataset in this section until the very end. Thank you for pointing this out. We have added text to clarify how the data was used: The rest of the records were then assumed to be negative for AHP for the purposes of statistical analysis and machine learning. The data set consisted of the positive records plus the presumed negative records. The entire data set was used for statistical analysis and training the machine learning models, the final goal of which was to identify the presumed negative records which are actually likely to be positive.

Why four patients? What was the rationale for this threshold?

Added text:

Requiring that included feature have at least four positive case patient records was chosen as a filter to strike a balance between only keeping the most common features, and keeping thousands of rare features requiring manual review that were unlikely be helpful in a generalized model.

What is the manual review process? Why not simply exclude features for EHR records that also have a corresponding AHP diagnosis, mention or treatment?

We could not exclude features as suggested since this criterion would not remove all the biased features and it may remove some associated unbiased features that could be useful.

Added: This was done by inspection using clinical domain knowledge.

How is this process different from the previous "manual review process"? Also, wouldn't the first review (if manual) have identified these same AHP-correlated features?

We needed a second pass, which included a clinical porphyria expert, to ensure that we did not miss any features that were biased by clinical pre-existing knowledge of a diagnosis of porphyria for the patient.

Added text:

This second pass incorporated a higher level of clinical expertise than the first pass. It was performed after filtering by SVM weight in order to reduce the screening load on our clinical expert.

I would expect the results section to begin with this number, highlighting the total number of patients in the entire dataset, then the final number of patients used for subsequent analyses.

Moved this text to the beginning of the results section.

General comment on all tables- please update the tables so they share the same

|                                                                                                                                                                                                                                                                                                                                                                                                                                                                                                     |                                                                                                                                                                                                                                                                                                                                                                                                                                                                                                                                                                                                                                                                                                                                                                                                                                                                                                                                                                                                                                                                                                                                                                                                                                                                                                                                                                                                                                                                                                                                                                                                                                                                                                                                                                                                                                                                                                                                                                                                                            |
|-----------------------------------------------------------------------------------------------------------------------------------------------------------------------------------------------------------------------------------------------------------------------------------------------------------------------------------------------------------------------------------------------------------------------------------------------------------------------------------------------------|----------------------------------------------------------------------------------------------------------------------------------------------------------------------------------------------------------------------------------------------------------------------------------------------------------------------------------------------------------------------------------------------------------------------------------------------------------------------------------------------------------------------------------------------------------------------------------------------------------------------------------------------------------------------------------------------------------------------------------------------------------------------------------------------------------------------------------------------------------------------------------------------------------------------------------------------------------------------------------------------------------------------------------------------------------------------------------------------------------------------------------------------------------------------------------------------------------------------------------------------------------------------------------------------------------------------------------------------------------------------------------------------------------------------------------------------------------------------------------------------------------------------------------------------------------------------------------------------------------------------------------------------------------------------------------------------------------------------------------------------------------------------------------------------------------------------------------------------------------------------------------------------------------------------------------------------------------------------------------------------------------------------------|
|                                                                                                                                                                                                                                                                                                                                                                                                                                                                                                     | <p>format throughout the paper (e.g. font, font size, bold use, number formats). We have reformatted the tables to use a consistent style.</p> <p>Total number of EHR records? Please clarify.<br/>Total number of EHR documents and patient records added to caption for Table 2.</p> <p>Unique patients, or unique records/document counts? And if document counts, is this the number of unique documents with a specific code? Please clarify.<br/>Clarified in table caption and column headings.</p> <p>Please spell out the document types. The current list appears to be table names from the database itself. For example, "current_medications" should be renamed "Concomitant Medications" or "Poly-Pharmacy". "demographics" should be "Patient Demographics". I also recommend providing a brief description of these fields, as some readers may not be as familiar with traditional EHR domains. I recommend including standard deviation with any results presenting Mean. Finally, be sure to format the table numbers (some rows appear to have comma delimiters, others do not).</p> <p>Table 3 document type names changed to correspond with the document types in Table 1. Reformatted numbers to not use commas.<br/>Table has been reformatted to be consistent and use full document names. Data dictionary definitions of the document types has been added to Table 1 to describe what is in these documents. Mean has been removed as table is too wide with the additions and larger font. Median and max remain and are sufficiently informative for this purpose.</p> <p>Please provide either a data dictionary with descriptions for each feature, or update this table with descriptions of each feature. The current format requires the reader to assume what each feature represents based on the feature dataset name, but formal descriptions would provide more explicit clarity for the reader.</p> <p>Table has been reformatted and extended to include data descriptions.</p> |
| <b>Additional Information:</b>                                                                                                                                                                                                                                                                                                                                                                                                                                                                      |                                                                                                                                                                                                                                                                                                                                                                                                                                                                                                                                                                                                                                                                                                                                                                                                                                                                                                                                                                                                                                                                                                                                                                                                                                                                                                                                                                                                                                                                                                                                                                                                                                                                                                                                                                                                                                                                                                                                                                                                                            |
| <b>Question</b>                                                                                                                                                                                                                                                                                                                                                                                                                                                                                     | <b>Response</b>                                                                                                                                                                                                                                                                                                                                                                                                                                                                                                                                                                                                                                                                                                                                                                                                                                                                                                                                                                                                                                                                                                                                                                                                                                                                                                                                                                                                                                                                                                                                                                                                                                                                                                                                                                                                                                                                                                                                                                                                            |
| <p><b>Financial Disclosure</b></p> <p>Enter a financial disclosure statement that describes the sources of funding for the work included in this submission. Review the <a href="#">submission guidelines</a> for detailed requirements. View published research articles from <a href="#">PLOS ONE</a> for specific examples.</p> <p>This statement is required for submission and <b>will appear in the published article</b> if the submission is accepted. Please make sure it is accurate.</p> | <p>AC, BH, SC, and MN received support for this work from Alnylam Pharmaceuticals, Inc., Cambridge, MA.</p> <p>SM, JK, JA and AW are/were employees of Alnylam Pharmaceuticals, Inc., Cambridge, MA during the time of this research.</p> <p>This work was funded and the associated editorial support was provided by Alnylam Pharmaceuticals, Inc., Cambridge, MA.<br/>Grant number 4510005336<br/><a href="https://www.alnylam.com/">https://www.alnylam.com/</a></p> <p>Alnylam participated in algorithm design and preparation of the manuscript. They had no role in the evaluation or EHR data collection and analysis, nor did they have any access to the individual patient electronic health record data used in this research.</p>                                                                                                                                                                                                                                                                                                                                                                                                                                                                                                                                                                                                                                                                                                                                                                                                                                                                                                                                                                                                                                                                                                                                                                                                                                                                            |

**Unfunded studies**

Enter: *The author(s) received no specific funding for this work.*

**Funded studies**

Enter a statement with the following details:

- Initials of the authors who received each award
- Grant numbers awarded to each author
- The full name of each funder
- URL of each funder website
- Did the sponsors or funders play any role in the study design, data collection and analysis, decision to publish, or preparation of the manuscript?
- **NO** - Include this sentence at the end of your statement: *The funders had no role in study design, data collection and analysis, decision to publish, or preparation of the manuscript.*
- **YES** - Specify the role(s) played.

\* typeset

**Competing Interests**

Use the instructions below to enter a competing interest statement for this submission. On behalf of all authors, disclose any [competing interests](#) that could be perceived to bias this work—acknowledging all financial support and any other relevant financial or non-financial competing interests.

This statement **will appear in the published article** if the submission is accepted. Please make sure it is accurate. View published research articles from [PLOS ONE](#) for specific examples.

I have read the journal's policy and the authors of this manuscript have the following competing interests:

GIVLAARI is a product of Alnylam. GIVLAARI is a prescription medicine used to treat acute hepatic porphyria (AHP) in adults.

**NO authors have competing interests**

Enter: *The authors have declared that no competing interests exist.*

**Authors with competing interests**

Enter competing interest details beginning with this statement:

*I have read the journal's policy and the authors of this manuscript have the following competing interests: [insert competing interests here]*

\* typeset

**Ethics Statement**

Enter an ethics statement for this submission. This statement is required if the study involved:

- Human participants
- Human specimens or tissue
- Vertebrate animals or cephalopods
- Vertebrate embryos or tissues
- Field research

Write "N/A" if the submission does not require an ethics statement.

General guidance is provided below. Consult the [submission guidelines](#) for detailed instructions. **Make sure that all information entered here is included in the Methods section of the manuscript.**

This study protocol was approved by the OHSU Institutional Review Board (IRB00011159).

**Format for specific study types**

**Human Subject Research (involving human participants and/or tissue)**

- Give the name of the institutional review board or ethics committee that approved the study
- Include the approval number and/or a statement indicating approval of this research
- Indicate the form of consent obtained (written/oral) or the reason that consent was not obtained (e.g. the data were analyzed anonymously)

**Animal Research (involving vertebrate animals, embryos or tissues)**

- Provide the name of the Institutional Animal Care and Use Committee (IACUC) or other relevant ethics board that reviewed the study protocol, and indicate whether they approved this research or granted a formal waiver of ethical approval
- Include an approval number if one was obtained
- If the study involved *non-human primates*, add *additional details* about animal welfare and steps taken to ameliorate suffering
- If anesthesia, euthanasia, or any kind of animal sacrifice is part of the study, include briefly which substances and/or methods were applied

**Field Research**

Include the following details if this study involves the collection of plant, animal, or other materials from a natural setting:

- Field permit number
- Name of the institution or relevant body that granted permission

**Data Availability**

Authors are required to make all data underlying the findings described fully available, without restriction, and from the time of publication. PLOS allows rare exceptions to address legal and ethical concerns. See the [PLOS Data Policy](#) and [FAQ](#) for detailed information.

No - some restrictions will apply

A Data Availability Statement describing where the data can be found is required at submission. Your answers to this question constitute the Data Availability Statement and **will be published in the article**, if accepted.

**Important:** Stating 'data available on request from the author' is not sufficient. If your data are only available upon request, select 'No' for the first question and explain your exceptional situation in the text box.

Do the authors confirm that all data underlying the findings described in their manuscript are fully available without restriction?

**Describe where the data may be found in full sentences. If you are copying our sample text, replace any instances of XXX with the appropriate details.**

- If the data are **held or will be held in a public repository**, include URLs, accession numbers or DOIs. If this information will only be available after acceptance, indicate this by ticking the box below. For example: *All XXX files are available from the XXX database (accession number(s) XXX, XXX).*
- If the data are all contained **within the manuscript and/or Supporting Information files**, enter the following: *All relevant data are within the manuscript and its Supporting Information files.*
- If neither of these applies but you are able to provide **details of access elsewhere**, with or without limitations, please do so. For example:

*Data cannot be shared publicly because of [XXX]. Data are available from the XXX Institutional Data Access / Ethics Committee (contact via XXX) for researchers who meet the criteria for access to confidential data.*

*The data underlying the results presented in the study are available from (include the name of the third party*

The source data used for this project is electronic health record (EHR) data, and contains protected health information (PHI) for patients under care at Oregon Health & Science University (OHSU). The OHSU Institutional Review Board (IRB) does not allow release of this data to the public, and doing so would violate US HIPAA laws. The OHSU IRB can be contacted at: [irb@ohsu.edu](mailto:irb@ohsu.edu). Questions about data requests may be sent to this address.

We are including full details of the machine learning model, training methods, and final features. Other investigators experienced in the field should be able to reproduce our methods on their own data to validate the results presented in this manuscript.



|                                                                                                                                                                                                                                         |                                                                                                                                     |
|-----------------------------------------------------------------------------------------------------------------------------------------------------------------------------------------------------------------------------------------|-------------------------------------------------------------------------------------------------------------------------------------|
| <p><i>and contact information or URL).</i></p> <ul style="list-style-type: none"><li>• This text is appropriate if the data are owned by a third party and authors do not have permission to share the data.</li></ul> <p>* typeset</p> |                                                                                                                                     |
| Additional data availability information:                                                                                                                                                                                               | Tick here if your circumstances are not covered by the questions above and you need the journal's help to make your data available. |

## **Detecting Rare Diseases in Electronic Health Records Using Machine Learning and Knowledge Engineering: Case Study of Acute Hepatic Porphyrria**

Aaron Cohen, MD, MS <sup>1\*</sup>  
Steven Chamberlin, ND <sup>1</sup>  
Thomas Deloughery, MD <sup>1</sup>  
Michelle Nguyen, BS <sup>1</sup>  
Steven Bedrick, PhD <sup>1</sup>  
Stephen Meninger, PharmD <sup>2</sup>  
John J. Ko, PharmD, MS <sup>2</sup>  
Jigar Amin, PharmD <sup>2</sup>  
Alex Wei, PharmD <sup>2</sup>  
William Hersh, MD <sup>1</sup>

<sup>1</sup>Department of Medical Informatics & Clinical Epidemiology, School of Medicine, Oregon Health & Science University, Portland, OR USA.

<sup>2</sup>Alnylam Pharmaceuticals, Cambridge, MA, USA.

\* Corresponding Author:

Aaron M. Cohen, MD MS

Professor

Department of Medical Informatics & Clinical Epidemiology

School of Medicine

Oregon Health & Science University

Portland, Oregon USA 97239

Email: [cohenaa@ohsu.edu](mailto:cohenaa@ohsu.edu)

## Abstract

### Background

With the growing adoption of the electronic health record (EHR) worldwide over the last decade, new opportunities exist for leveraging EHR data for detection of rare diseases. Rare diseases are often not diagnosed or delayed in diagnosis by clinicians who encounter them infrequently. One such rare disease that may be amenable to EHR-based detection is acute hepatic porphyria (AHP). AHP consists of a family of rare, metabolic diseases characterized by potentially life-threatening acute attacks and, for some patients, chronic debilitating symptoms that negatively impact daily functioning and quality of life. The goal of this study was to apply machine learning and knowledge engineering to a large extract of EHR data to determine whether they could be effective in identifying patients not previously tested for AHP who should receive a proper diagnostic workup for AHP.

### Methods and Findings

We used an extract of the complete EHR data of 200,000 patients from an academic medical center for up to 10 years longitudinally and enriched it with records from an additional 5,571 patients from the center containing any mention of porphyria in notes, laboratory tests, diagnosis codes, and other parts of the record. After manually reviewing the records of all 47 unique patients with the ICD-10-CM code E80.21 (Acute intermittent [hepatic] porphyria), we identified 30 patients who were positive cases for our machine learning models, with the rest of the patients used as negative cases. We parsed the record into features, which were scored by frequency of appearance and labeled by the EHR source document. We then carried out a univariate feature analysis, manually choosing features not directly tied to provider attributes or suspicion of the patient having AHP. We next trained on the full dataset, with the best cross-validation performance coming from support vector machine (SVM) algorithm using a radial basis function (RBF) kernel. The trained model was applied back to the full data set and patients were ranked by margin distance. The top 100 ranked negative cases were manually reviewed for symptom complexes similar to AHP, finding four patients where AHP diagnostic testing was likely indicated and 18 patients where AHP diagnostic testing was possibly indicated. From the top 100 ranked cases of patients with mention of porphyria in their record, we identified four patients for whom AHP diagnostic testing was possibly indicated and had not been previously performed. Based solely on the reported prevalence of AHP, we would have expected only 0.002 cases out of the 200 patients manually reviewed.

### Conclusions

The application of machine learning and knowledge engineering to EHR data may facilitate the diagnosis of rare diseases such as AHP. The only manual modifications to this work were the removal of disease-specific or medical center specific features that might undermine our ability to find new cases. Further work will recommend clinical investigation to identified patients' clinicians, evaluate more patients, assess additional feature selection and machine learning algorithms, and apply this methodology to other rare diseases.

## Introduction

The growing adoption of the electronic health record (EHR) worldwide has created new opportunities for leveraging EHR data for other, so called *secondary* purposes, such as clinical and translational research, quality measurement and improvement, patient cohort identification and more (1). One emerging use case for leveraging of EHR data is to detect undiagnosed rare diseases. Although there is no absolute definition of a rare disease, the US Rare Diseases Act of 2002 defines rare diseases as those that occur in fewer than 200,000 patients worldwide (2), and the National Organization for Rare Disorders (NORD, <https://rarediseases.org/>) registry lists more than 1,200 diseases. Others have noted that the true number of rare diseases is unknown, and have called for more research to define them (3).

Rare diseases can be difficult to diagnose because their infrequent occurrence may result in primary care physicians not considering them in diagnostic workups (4). They also often have general presentations with diffuse symptoms, as well as genetic components which may require specialized testing. This lack of timely diagnosis may lead to both physical and emotional suffering as patients remain undiagnosed for prolonged periods. Additionally, a lack of accurate diagnoses increases economic burden to healthcare systems as patients continue to receive inadequate and/or inappropriate treatment. Some informatics researchers have used EHR data to detect rare diseases, such as cardiac amyloidosis (5), lipodystrophy (6), and a large collection of different diseases (7, 8).

One rare disease that may be amenable to EHR-based detection is acute hepatic porphyria (AHP). AHP is a subset of porphyria that refers to a family of rare, metabolic diseases characterized by potentially life-threatening acute attacks and, for some patients, chronic debilitating symptoms that negatively impact daily functioning and quality of life (9-13). During attacks, patients typically present with multiple signs and symptoms due to dysfunction across the autonomic, central, and peripheral nervous systems. The prevalence of diagnosed symptomatic AHP patients is ~1 per 100,000 (14). Due to the nonspecific symptoms and the rare nature of the disease, AHP is often initially overlooked or misdiagnosed. A U.S. study demonstrated that diagnosis of AHP is delayed on average by up to 15 years (15).

AHP is predominantly caused by a genetic mutation leading to a partial deficiency in the activity of one of the eight enzymes responsible for heme synthesis (12). These defects predispose patients to the accumulation of neurotoxic heme intermediates aminolevulinic acid (ALA) and porphobilinogen (PBG) when the rate limiting enzyme of the heme synthesis pathway, aminolevulinic acid synthase 1 (ALAS1), is induced (10, 16). Gene mutations causing the disease are mostly autosomal dominant, however the disease has low penetrance (~1%) and many specific mutations have not been identified (17). Furthermore, families carrying the gene may have few or only one affected member. Therefore, family history can be a poor diagnostic tool for this disease. The preferred diagnostic procedure for AHP is biochemical testing of random/spot urine for ALA, PBG, and porphyrins (18, 19).

Historically, treatment of AHP has predominantly focused on avoidance of attack triggers, management of pain and other chronic symptoms, and treatment of acute attacks through the use of Panhematin<sup>®</sup> (hemin for injection) (20). Panhematin was FDA approved in 1983 for the

amelioration of recurrent attacks of acute intermittent porphyria (AIP) temporally related to the menstrual cycle in susceptible women after initial carbohydrate therapy is known or suspected to be inadequate.

Recently, a new drug Givlaari® (givosiran), for subcutaneous injection has been approved by the FDA for the treatment of adults with AHP (21). Givosiran is a double-stranded small interfering RNA (siRNA) molecule that reduces induced levels of the protein ALAS1. A Phase 1 trial has been published (22) and a Phase 3 randomized control trial has shown this therapy to be effective in reducing the occurrence of acute attacks and impacting other manifestations of the disease (21).

## Materials and Methods

This study protocol was approved by the OHSU Institutional Review Board (IRB00011159). 

### Dataset

Oregon Health & Science University (OHSU) is the only academic medical center in Oregon and is thus a referral center for rare diseases like AHP. The OHSU Research Data Warehouse (RDW) is a research data “honest broker” service that provides EHR data to researchers, with appropriate IRB approval. The investigators have an ongoing institutional review board (IRB) approval to use an extract from the Oregon Health & Science University (OHSU) EHR research data warehouse (RDW) for a series of patient cohort identification projects. For this research, the patient cohort to identify was defined as those patients who have a documented clinical history of AHP, or a clinical history indicating that AHP diagnostic testing may be appropriate. **The goal of this study was to apply machine learning and knowledge engineering to a large extract of EHR data to determine whether the combined approach could be effective in identifying patients not previously tested for AHP who should receive a proper diagnostic workup for AHP.** 

A large dataset of approximately 200,000 patient records was requested from the RDW, complete as of the data pull date in March 2019, including over 30 million text notes plus other document types. The data set goes back to the start of OHSU using the Epic EHR system in January, 2009. These records consist of all patients who had more than one primary care health care visit at our institution. Each patient record was represented as a collection of documents of types given in **Table 1**. Patient records could include zero or more documents of each type.

**To insure an adequate sample size to make predictive models robust, we enriched the data set for possible AHP by adding records from an additional 5,571 patients who met one or more of the following case-insensitive criteria (see **Table 2**):** 

- Diagnosis including the wildcard search term “porph\*” in the diagnosis name
- Medication including the wildcard search term “hemin\*” in the medication name
- Procedure including the wildcard search term “porph\*” in the procedure name
- Clinical or result note including the wildcard search term “porph\*” in the note text

To develop a gold standard for the data, a medical student (MN), overseen by clinical experts among the rest of the authors, conducted a chart review to identify patients with a confirmed diagnosis of AHP. We manually reviewed all the patients with the ICD-10-CM code E80.21

(Acute intermittent [hepatic] porphyria) in their record, looking for positive confirmation of AHP either through a lab test or a specific comment in a progress note. This process yielded 30 positive cases from the 47 coded for E80.21. As OHSU is the only academic medical center in Oregon and is thus a referral center for rare diseases like AHP, this may explain why the number of identified AHP patients in our database was higher than that which would be expected based on the global prevalence of AHP. For the remaining 17 records, we could not confirm by chart review the diagnosis of AHP. This may be due to the code being attached to the patient based on an encounter to rule out AHP, inaccurate past medical history data, or a charting error. For these 17 patients no additional information supporting the AHP diagnosis was found in the notes, clinical tests or medication records and the only evidence of AHP was an ICD-10-CM code at one place in the medical record.

The rest of the records were then assumed to be negative for AHP for the purposes of statistical analysis and machine learning. The data set consisted of the positive records plus the presumed negative records. The entire data set was used for statistical analysis and training the machine learning models, the final goal of which was to identify the presumed negative records which are actually likely to be positive.

We then deconstructed each patient record into a number of features to be used for machine learning. Structured data fields were encoded directly with the entire field content used as the feature. Free-text fields were parsed into unigrams and bigrams.

All features were labeled with their source document fields. This enabled, for example, diagnosis names in ICD-10-CM code fields in the problem list to be distinguished from the same text appearing in free text notes. Feature values were encoded as the number of occurrences in the entire record for the patient. A summary of the types and counts of documents in the data set is shown in **Table 3**.

### *Feature Selection and Machine Learning Methods*

Features to be included in the machine learning model were selected by performing **univariate**  logistic regression analysis of the entire feature set, using the confirmed AHP patients as positive samples and the rest of the data set as negative samples. For each document type, the 100 top features were chosen, ranked by odds ratio, having a p-value < 0.01 and occurring in at least 4 positive case patient records. This statistical criteria was used to establish which data elements had a significant relationship between the outcome variable, which was the presence, or not, of a confirmed diagnosis of AHP. Requiring that included features have at least four positive case patient records was chosen as a filter to strike a balance between only keeping the most common features, and keeping thousands of rare features requiring manual review that were unlikely be helpful in a generalized model.

From these several hundred features, a manual review process was performed to ensure that none of these features were directly connected to a diagnosis of AHP, mention of AHP in the record, or treatment of AHP. This was done by inspection. This process eliminated all text features mentioning any bigram of “acute hepatic porphyria,” medications such as hematin, and laboratory codes that in the OHSU system represented tests specifically for the diagnosis of porphyria.

The remaining features were then evaluated by using them in a machine learning model and scoring the model using 5 repetitions of 2-fold cross-validation. Several SVM kernel functions were tested including linear, polynomial degree 2, and the radial basis function (RBF), random forests, Adaboost, J48, and several topologies of Neural Network. Two normalization encoding methods were tried as well, binary, linear and log normalizing feature occurrence counts between 0.0 and 1.0.

After algorithm selection, a second round of feature screening was performed. Any features with non-zero algorithm weights were removed if any direct connection to AHP could be established. This was performed by close scrutiny and discussion with our clinical expert for each feature. This second pass incorporated a higher level of clinical expertise than the first pass. It was performed after filtering by machine learning weights in order to reduce the **screening load**  our clinical expert.

### *Machine Learning for AHP Prediction and Evaluation Methodology*

A final trained model using the features selected was created by training the selected algorithm with chosen parameter settings on the entire data set. This model was then applied back to the entire data set in order to create an AHP prediction score for each patient. The classifier margin distance was taken as the prediction score.

The patient prediction scores were then analyzed. To keep the manual chart review process manageable, we could not review every patient. **We decided to review the top scoring 100 cases manually from each of two subsets of the general population.** 

The first reviewed subset of 100 patients were those with no mention of porphyria in their chart, no related ICD-9-CM or ICD-10-CM codes, and no porphyria specific lab test. We selected the top scoring 100 patients that met these criteria. This represents the most important target population for our project – patients with persistent symptoms that have not had AHP considered and tested to rule it in or out as a diagnosis. Manual review of these cases is intended to demonstrate the potential of our proposed approach to identify potential cases of AHP that would benefit from diagnostic testing and follow up.

The second reviewed subset of 100 patients were those with a mention of porphyria in the text notes in their chart, but no related ICD-9-CM or ICD-10-CM diagnosis codes, and no porphyria-specific lab test. These are patients where porphyria may have been considered by the clinician, or may have been tested at another health care facility with unavailable records, or may have been a work up in progress. Manual review of these cases was intended to discern the clinical face validity of the algorithmic predictions, that is, the high scoring patients in this group score high because the algorithm is paying attention to some of the same non-AHP-specific clinical symptoms and other variables as the clinician. While the manual review of these patients was primarily intended for gaining insight into how the algorithm was scoring patients with porphyria mentioned in the charts, based on the manual review some patients who may benefit from diagnostic testing could be found.

A clinically trained reviewer assessed the patients' records in these two non-overlapping subsets for symptom patterns consistent with acute hepatic porphyria (AHP). The reviewer was blinded to the model features. Clinical notes were searched for the 'classic triad' of AHP symptoms: abdominal pain, central nervous system abnormalities, and peripheral neuropathy (23). In

addition, any report of pain was assessed, and searches were also conducted for the highest incident AHP symptoms: abdominal pain, vomiting, constipation, muscle weakness, psychiatric symptoms, limb, head, neck, or chest pain, hypertension, tachycardia, convulsion, sensory loss, fever, respiratory paralysis, diarrhea (23). All major comorbidities were also reviewed and documented, as well as alternative diagnoses to explain AHP symptom profiles.

The 100 patients with no mention of porphyria in their EHR record were classified into one of three categories: *AHP diagnostic testing likely indicated*, *AHP diagnostic testing possibly indicated*, and *AHP diagnostic testing unlikely indicated*. To be classified as *likely*, symptoms had to be present in all three categories of the ‘classic triad’, without a cause identified in the EHR, and with a substantial history of symptoms. To be classified as *possibly*, symptoms had to be present in at least one of the three categories, without a cause documented and with a substantial history. Patients were classified as *unlikely* if their symptoms could be explained by another diagnosis, or if they did not have a strong AHP symptom profile.

The 100 patients who did have a mention of porphyria in their clinical notes were classified into one of five categories of AHP status based on chart review and details in the clinical notes: *AHP already suspected*, *AHP already suspected but ruled out*, *diagnostic testing likely indicated but AHP not suspected*, *unlikely AHP*, and *AHP diagnosis mentioned in notes*. A patient was classified as *AHP already suspected* if there was any level of AHP suspicion mentioned in their clinical notes, without a formal diagnosis or lab test. *AHP already suspected but ruled out* was assigned if there was a suspicion of AHP in the note, but had been ruled out, usually by negative lab tests. These lab tests were only documented in the note, since we excluded patients from this subset who had lab tests in the laboratory data itself. *Diagnostic testing likely indicated but AHP not suspected* was assigned if there were symptoms present in at least one of the three triad categories, without a cause, but no suspicion of AHP mentioned in the notes. For these patients the clinical notes contained the string ‘porph’ but presence of ‘porph’ in the clinical note was not related to suspicion of AHP. *Unlikely AHP* was assigned if AHP type symptoms could be explained by another diagnosis, or there was not a strong AHP symptom profile. Finally, patients were assigned to *AHP diagnosis* if there was any mention of an existing AHP diagnosis in the notes, even patient reported. The reasons for the presence of the string ‘porph’ in the clinical note for the second set of 100 patients was also reviewed and documented. Patient’s categorized as *AHP already suspected* and *Diagnostic testing likely indicated but AHP not suspected* would benefit from AHP testing as they displayed suspicion of AHP or symptom complexes associated with AHP but have yet received a full diagnostic work-up.

## Results

### *Final selected features and machine learning cross-validation*

Figure 1 shows a flowchart of the overall patient record filtering and manual review process. The process starts with 204,413 patient records, and using a combination of machine learning and structured data filtering described above, identifies 200 patients that were manually reviewed. 100 of those patients were identified as not having any mention of porphyria in the medical record and potentially could benefit from AHP diagnostic testing. The other 100 of those patients did have mention of porphyria in their medical record, but no diagnostic code for porphyria. These records were reviewed to determine the reason for the mention of porphyria and evaluate whether these reasons were consistent with the goal of the machine learning to identify patients with symptoms and other clinical features consistent with a possible porphyria diagnosis.



Several hundred features made it through the statistical testing and occurrence frequency filter. From these several hundred features, the manual review process reduced the set to approximately 200 features. These features were then evaluated by using them in a machine learning model and scoring the model using 5 repetitions of 2-fold cross-validation. These experiments found that an SVM with the radial basis function (RBF) kernel scored best for the ranking metrics AUC and average precision. The other machine learning methods explored failed to perform as well as the RBF SVM. It was also determined that feature values were best encoded using log normalization, transforming feature occurrence counts into values between 0.0 and 1.0. Binary encoding, as well as linear normalization, failed to perform as well. We used the SVMLight implementation of the RBF kernel. Experimentation with cross-validation showed  $\gamma = 0.04$  to be optimal.

After algorithm selection and tuning, the second round of feature screening removed a few features that the SVM model assigned non-zero weights which were thought to be directly connected to the pre-established diagnosis of AHP by the clinical expert. For example, based on case series evidence, clinical hematology AHP specialists sometimes use cimetidine to treat AHP symptoms, as it is known to block a portion of the heme synthesis pathway as a side effect (24). We found that cimetidine was a highly weighted feature in our initial models (due to its use by a specialist [TD] at OHSU based on case report data (24)) that had to be removed as it is given in response to AHP rather than being predictive. This process resulted in 141 total features being included in the final model.

The 141 features included in the final model are shown in **Table S-1**. Final feature set cross-validation performance on the entire training set is shown in **Table 4**.

#### *Application of machine learning to the full data set*

The final machine learning model with the 141 features was trained on the entire data set, and this model was then applied back to the entire data set in order to provide a margin distance score for every patient.

The patient prediction scores were then analyzed. In particular, the range of scores obtained for the 30 confirmed positive training cases were compared to the rest of the patients in the data set. About 22,000 patients in the general population had scores that overlapped with those of the 30 positive patients. While this was only 10% of the patient records, it was more than could be manually reviewed.

We reviewed the top scoring 100 cases manually from each of two subsets of the general population. Out of the 100 patient charts we reviewed with no mention of porphyria, four were identified as likely to *AHP diagnostic testing likely indicated*, all without mention of porphyria in their medical record or documentation of a urine PBG test. The first patient was a male with six years of unexplained intermittent abdominal pain with nausea, vomiting, and diarrhea. His other conditions included complex regional pain syndrome, peripheral neuropathy, cardiac arrhythmias, panic attacks, and depression. The next patient was a female whose abdominal pain was described as ‘a long standing symptom with extensive negative evaluation’. Also listed in her profile were neuralgias, hereditary small fiber neuropathy, movement disorder, fibromyalgia, migraines, palpitations, and somatization disorder. The third patient was a woman with multiple emergency department admissions for severe abdominal pain. She also had severe suicidality with a permanent tracheostomy due to a hanging attempt, borderline personality disorder,

tachycardia, anxiety, saddle anesthesia, insomnia, and severe somatization disorder including a comment in her note advising not to admit the patient for only vague complaints. The fourth patient was a female with a history of abdominal pain comments in the notes describing that the etiology had not been identified for her complex symptomology which included headaches, abdominal pain, paresthesias and palpitations.

Overall, about a quarter of the 100 patients in the group without mention of porphyria had symptom profiles that were consistent with undiagnosed AHP and AHP diagnostic testing would either be likely or possibly indicated (**Table 5**). In this group there was no sign or suspicion of AHP by the clinician in the record. This is a much higher concentration of possible AHP patients than would be expected by chance based on the known prevalence of AHP.

Alternate explanations for characteristic AHP symptom profiles were diverse in the patient group without any mention of porphyria (**Table 6**). Cancers seen in this group included breast, uterine, pancreatic, cervical, leukemia and adrenal carcinoma. Other common comorbidities and conditions seen in this group included: fibromyalgia, irritable bowel syndrome, chronic fatigue, obesity, hypertension, obstructive sleep apnea, and chronic obstructive pulmonary disease. In contrast, alternate symptom profiles in the group with mention of porphyria in the notes were dominated by liver pathologies, mostly hepatocellular carcinoma.

Patients in the group *without* mention of porphyria in the medical record generally had much longer and more complicated histories compared to the other group, with 86 out of 100 having encounters spread over four years or longer. The patients *with* porphyria mentioned in the clinical notes tended to have shorter, and less complex histories (only 39 out of 100 had over 4 years of encounters), more focused on a single medical issue or set of symptoms, which may have been due to their being referral to our academic medical center from other health care sites.

There were small differences in age summary statistics between the two groups (**Table 7**), but notably more pediatric patients in the reviewed group with mention of porphyria found in clinical notes than those without (10 patients vs 1 patient). There were significantly more male patients found in this group too, compared to the group with no mention of porphyria (**Table 8**).

Associated conditions for these 44 male patients were dominated by only a few diagnoses/symptom patterns: liver disease (N=18), suspicion of porphyria (N=11), or actinic keratosis (N=3). In contrast, no single condition dominated the male disease distribution in the patient group without mention of porphyria in the notes.

About a third of patients in the group *with* mention of porphyria in the clinical notes had some level of suspicion and work-up for AHP documented. We also identified four patients in this group that we thought had possibly undiagnosed AHP, without suspicion documented in the notes. We labeled these patients as *Diagnostic testing likely indicated but AHP not suspected*. Three of these patients had 'porphyria' in their clinical note listed as a standard precaution for several different medications (hydrochloroquinone, ferrous sulfate), which they were taking. In fact, about two thirds of the patients with 'porphyria' in the clinic notes had other reasons, besides suspicion of AHP, for the presence of this word (**Table 9**). A large number of these patients were candidates for liver transplantation. Standard clinical documentation for evaluation for this procedure included a list of possible causes of liver failure, including protoporphyria.

Porphyria was also mentioned as a precaution for certain medications or treatments given to some patients in this group, which included hydroxychloroquine ferrous sulfate, therapeutic abortion, and UV light therapy for actinic keratosis.

## **Discussion**

This work identified four likely and 18 possible patients who had no mention of porphyria in their charts for whom AHP diagnostic testing could be indicated. In addition, four patients who had mention of porphyria in their charts not related to a diagnostic evaluation of the disease were also found likely to have AHP diagnostic testing indicated. This number of patients with indications for AHP diagnostic testing and possibly to-be confirmed diagnosis vastly exceeds that due to chance and surpassed our expectations. It will require clinical follow-up to determine whether these patients' symptoms are truly due to AHP or not, but the manual record review clearly demonstrates that our methodology has found patients for whom a spot urine porphobilinogen test is indicated.

Another benefit of identifying such patients is to inform local specialists of the presence of patients with rare diseases in which they have expertise. An institution-wide search for confirmed AHP patients through our targeted ICD-10-CM code search plus manual chart review identified 30 confirmed AHP patients. A majority of these patients were previously unknown to the porphyria specialist (TD) at OHSU. Identifying rare disease patients through large-scale data review in this manner can help connect them with the appropriate specialist to ensure optimal care.

Our results strongly suggest that leveraging of EHR data coupled with machine learning can be an effective method of identifying patients who should receive a diagnostic biochemical test to screen for AHP. Our automated model was able to identify patients with compelling constellations of symptoms who had not been previously worked up for porphyria. It was also able to identify patients for whom porphyria had been considered without direct access to porphyria-related data elements such as hemin treatment, lab tests specific to AHP, or mention of AHP diagnosis in clinical notes.

This is especially interesting in the light that the overall cross-validation scores of the model on the data set using the known 30 AHP cases as the positive set and the rest of the data as negative training samples was not very high, with cross-validation yielding an average AUC = 0.775. This is certainly a low performance figure compared to other current machine learning tasks such as publication type identification (25), or facial image recognition (26). However, these other tasks are very different from this one due to the extremely rare nature of the positive AHP cases in both the training data as well as in the actual patient population. In most machine learning research, a data set is considered skewed or imbalanced if the number of positive cases is much less than 50%. A recent systematic review on imbalanced data classification cites articles investigating negative to positive case ratios of 100 to 1 as "highly imbalanced" (27, 28). For problems such as rare diseases, the imbalance ratio can be nearly 10,000 to 1, as it is here. Lifting the predictive power to perhaps 22 in 100 manually reviewed cases is a potentially transformative level of performance.

The strongest positive predictors in the model included unexplained abdominal pain, pelvic and perineal pain, nausea and vomiting, and a number of pain and nausea medications. Frequent urinalysis was also a strong positive predictive feature, this is likely due to being associated with frequent ER visits and hospitalizations. The model relied on encoding the frequency of episodes, and not just binary presence of absence of symptoms. Indirectly, in the model this represented recurrent, undiagnosed problems consistent with AHP.

As these methods are general, and not specific to AHP, they should be applicable to other rare disorders that have a constellation of recurrent symptoms as indicating features. There are likely ways to improve the machine learning approach, including the use of more advanced features that represent time, duration, and intervals, explicit coding of symptom separation and overlap, and more sophisticated machine learning algorithms specifically tailored to situations where the positive case is extremely rare. Investigation into machine learning algorithms for highly skewed data such as these is an active area of research (29).

## **Conclusion**

The combination of large data sets, machine learning techniques, and clinical knowledge engineering can be a powerful tool to identify patients with undiagnosed rare diseases. The use case of AHP presented here revealed four undiagnosed patients thought likely to have AHP, as well as 18 others who would likely benefit from testing. This level of precision in identifying potential cases of AHP from EHR data is much higher than would be expected by the prevalence of the disease.

Analyzing the EHR with advanced techniques such as demonstrated here points to the potential of the future of digital medicine on a population scale. Advanced approaches enabled by the wide deployment of the EHR can now be used to improve medicine and medical care in areas that have been underserved or inaccessible. Health care can be made more proactive, not simply in terms of common conditions and age or gender related screening, but for rarer conditions as well.

We plan to continue this work in several directions. First, an IRB-approved clinical validation study is being implemented. In this study, we will contact the primary care clinicians (PCP) of the patients where AHP diagnostic testing was found to be *likely* or *possibly* indicated. We will inform them that an algorithm based on EHR data has determined that their patient might have AHP and could benefit from a spot urine porphobilinogen, which is an inexpensive, non-invasive and easy to perform diagnostic test. With the agreement of the PCP, we will then contact patients and offer them the test. Expert clinical consultation will be made available to the PCP for any questions they have. We will collect data on the interactions with the PCPs, the number of spot urine porphobilinogen tests administered, as well as the test results. In this manner, we will be able to study the clinical impact of our rare disease identification approach.

Second, we will continue to refine our methods. Other machine learning algorithms, such as random forests and deep learning, may have advantages for AHP and other rare diseases. Other methods of encoding the EHR data that incorporate embeddings and temporal representations,

have been shown to demonstrate leading-edge results in other fields, such as computer vision, machine translation, and speech recognition, and may assist with rare diseases.

Finally, we will extend this methodology to other rare diseases that are difficult to diagnose, focusing on those for which effective treatments are becoming available. If the timeline for diagnosing rare conditions can be substantially reduced, there is great potential to impact patient health in a very significant manner.

### **Acknowledgements and Funding**

This work was funded and the associated editorial support was provided by Alnylam Pharmaceuticals, Inc., Cambridge, MA.

### **Declaration of Interest**

Stephen Meninger, John J. Ko, and Jigar Amin, are employees of Alnylam, and Alex Wei was an employee of Alnylam during his contribution to the manuscript.

**Table 1.** Electronic Health Record (EHR) document types used in this research.

| <b>EHR Document Record Type</b> | <b>Description of Document</b>                                                                             |
|---------------------------------|------------------------------------------------------------------------------------------------------------|
| Administered Medications        | Medications given to patient during a hospital stay or ambulatory encounter.                               |
| Current Medications             | The concomitant medications a patient is taking, as documented by providers during encounters.             |
| Demographics                    | Patient demographic information                                                                            |
| Encounter Diagnosis             | The diagnoses and diagnostic codes assigned to a patient ambulatory encounter.                             |
| Hospital Encounters             | Patient-level hospital admission information including times and billing codes.                            |
| Lab Results                     | Results of ordered lab tests including order time.                                                         |
| Medications Ordered             | Medications ordered by for patients by clinicians during an encounter.                                     |
| Microbiology Results            | Results of microbiology lab tests in text form.                                                            |
| Notes                           | All types of clinical text including progress notes and discharge summaries.                               |
| Problem List                    | The concomitant list of active medical issues for a patient, as documented by providers during encounters. |
| Procedures Ordered              | Procedures ordered by clinicians for patients during an encounter.                                         |
| Lab Result Comments             | Non-numerical, text portion, if any for results of lab tests.                                              |
| Surgeries                       | Description of surgeries performed on patient at hospital in both text and coded forms.                    |
| Vitals                          | Documentation of vital values such as heartrate, blood pressure, weight, and temperature.                  |

**Table 2.** Electronic Health Record (EHR) total document and unique patients counts of porphyria codes and mentioned in text notes or label tests. Counts shown here are out of a total of 347,709,284 individual EHR documents and 204, 413 total unique patient records.

| <b>Code</b>                                         | <b>Total Documents</b> | <b>Total Patients</b> |
|-----------------------------------------------------|------------------------|-----------------------|
| ICD9 277.1                                          | 3879                   | 308                   |
| E80.0 Hereditary erythropoietic porphyria           | 472                    | 37                    |
| E80.1 Porphyria cutanea tarda                       | 783                    | 77                    |
| E80.20 Unspecified porphyria                        | 2010                   | 247                   |
| E80.21 Acute intermittent (hepatic) porphyria       | 1016                   | 47                    |
| E80.29 Other porphyria                              | 109                    | 24                    |
| E80.4 Gilbert syndrome                              | 3197                   | 366                   |
| E80.6 Other disorders of bilirubin metabolism       | 9502                   | 2308                  |
| E80.7 Disorder of bilirubin metabolism, unspecified | 75                     | 58                    |
| Patients with porphyria mentioned in a lab test:    | 359                    | 175                   |
| Searching field NOTE_TEXT for term porphyria:       | 14353                  | 3012                  |

**Table 3.** Summary of document types and counts used in the EHR data set for this research.

| <b>Document Type</b>     | <b>Patients</b> | <b>Encounters</b> | <b>Records</b> | <b>Median</b> | <b>Max</b> |
|--------------------------|-----------------|-------------------|----------------|---------------|------------|
| Current Medications      | 187724          | N/A               | 99602443       | 89            | 57406      |
| Demographics             | 204413          | N/A               | 204413         | 1             | 1          |
| Encounter Attributes     | 204412          | 19589057          | 19589057       | 43            | 3335       |
| Encounter Diagnoses      | 202843          | 10113657          | 52295188       | 69            | 27215      |
| Hospital Encounters      | 145551          | 1163284           | 1163284        | 3             | 520        |
| Lab Results              | 172795          | 2012185           | 58386934       | 84            | 27384      |
| Ordered Medications      | 190256          | 3964120           | 15155203       | 23            | 7041       |
| Microbiology Results     | 54798           | 145528            | 1988429        | 5             | 5174       |
| Notes                    | 204161          | 10014987          | 28938900       | 56            | 14933      |
| Problem List             | 181221          | N/A               | 1737749        | 6             | 204        |
| Procedures Ordered       | 198833          | 5129756           | 19501225       | 31            | 35364      |
| Result Comments          | 131104          | 896896            | 1542279        | 4             | 1765       |
| Surgeries                | 44238           | 78403             | 83535          | 1             | 54         |
| Vitals                   | 199971          | 3500418           | 18268032       | 24            | 9442       |
| Administered Medications | 100565          | 349332            | 17160858       | 17            | 53178      |
| Ambulatory Encounters    | 204235          | 12091755          | 12091755       | 27            | 1991       |



**Table 4.** Cross-validation performance of the final feature set on the entire data set for ranking the 30 confirmed cases of porphyria higher than the general population. SVM with radial basis function (RBF) kernel and gamma = 0.04.

| <b>Metric</b>            | <b>Score</b> |
|--------------------------|--------------|
| <b>AUC</b>               | 0.775        |
| <b>Average Precision</b> | 0.060        |
| <b>Precision @ 100</b>   | 0.031        |
| <b>Log Loss</b>          | 0.404        |

**Table 5.** Assessment of the likelihood of undiagnosed acute hepatic porphyria based on clinical note symptom documentation. Both groups of 100 reviewed patients are listed.

|                                                | <b>Acute Hepatic Porphyria?</b>                                       | <b># Patients</b> |
|------------------------------------------------|-----------------------------------------------------------------------|-------------------|
| <i>No mention of porphyria group (n=100)</i>   | Diagnostic test is <i>Likely Indicated</i>                            | 4                 |
|                                                | Diagnostic test is <i>Possibly Indicated</i>                          | 18                |
|                                                | Diagnostic test is <i>Unlikely Indicated</i>                          | 68                |
|                                                | Deceased                                                              | 10                |
| <i>'Porph' in clinical notes group (n=100)</i> | Suspected in chart                                                    | 16                |
|                                                | Suspected, ruled out in chart                                         | 15                |
|                                                | Diagnostic test is <i>Possibly Indicated</i> , not suspected in chart | 4                 |
|                                                | Unlikely based on chart review                                        | 54                |
|                                                | Diagnosed, documented in chart                                        | 4                 |
|                                                | Unknown, unable to determine                                          | 1                 |
|                                                | Deceased                                                              | 6                 |

**Table 6.** Top alternative explanations for AHP symptom profiles seen in both groups of patients. Conditions seen in no more than one patient are not listed.

|                                      | <b>Alternate AHP Symptom Explanation</b>   | <b># Patients</b>              |    |
|--------------------------------------|--------------------------------------------|--------------------------------|----|
| <i>No mention of porphyria group</i> | Surgery                                    | 8                              |    |
|                                      | Inflammatory Bowel Disease                 | 6                              |    |
|                                      | Cancer                                     | 6                              |    |
|                                      | Cancer Chemotherapy                        | 5                              |    |
|                                      | Gallbladder Pathology                      | 4                              |    |
|                                      | Diabetes                                   | 3                              |    |
|                                      | Carnitine Palmitoyl Transferase Deficiency | 2                              |    |
|                                      | Renal                                      | 4                              |    |
|                                      | Poly Cystic Ovarian Syndrome               | 2                              |    |
|                                      | Appendicitis                               | 2                              |    |
|                                      | Mastocytosis                               | 2                              |    |
|                                      | <i>'Porph' in clinical notes group</i>     | Liver Pathology                | 30 |
|                                      |                                            | Chemotherapy/Drug Side Effects | 3  |
| Mastocytosis                         |                                            | 2                              |    |

**Table 7.** Age statistics in years for the two patient groups.

|               | <b>NO MENTION OF<br/>PORPHYRIA</b> | <b>'PORPH' IN<br/>CLINICAL NOTES</b> |
|---------------|------------------------------------|--------------------------------------|
| <b>MEDIAN</b> | 51                                 | 54                                   |
| <b>MEAN</b>   | 53                                 | 50                                   |
| <b>MIN</b>    | 8                                  | 6                                    |
| <b>MAX</b>    | 91                                 | 91                                   |

**Table 8.** Sex distribution for the two patient groups.

|               | <b>NO<br/>MENTION<br/>OF<br/>PORPHYRIA</b> | <b>'POPRH'<br/>IN<br/>CLINICAL<br/>NOTES</b> |
|---------------|--------------------------------------------|----------------------------------------------|
| <b>MALE</b>   | 25                                         | 44                                           |
| <b>FEMALE</b> | 75                                         | 56                                           |

**Table 9.** Top reasons for the presence of the word ‘porph’ found in the clinical note.

| <i>More<br/>Common<br/>Reasons for<br/>'Porph' in<br/>Clinical Notes</i> | <b>#<br/>Patients</b> |
|--------------------------------------------------------------------------|-----------------------|
| <i>Suspicion of<br/>Porphyria</i>                                        | 31                    |
| <i>Liver<br/>Transplant<br/>Documentation</i>                            | 30                    |
| <i>Porphyria<br/>Mentioned in<br/>Treatment<br/>Precautions</i>          | 18                    |
| <i>Porphyria<br/>Diagnosis<br/>Mentioned in<br/>Notes</i>                | 4                     |
| <i>Porphyria Lab<br/>Tests Listed<br/>for Screening<br/>Physical</i>     | 3                     |
| <i>Family History<br/>of Porphyria</i>                                   | 5                     |
| <i>Misspelling</i>                                                       | 2                     |

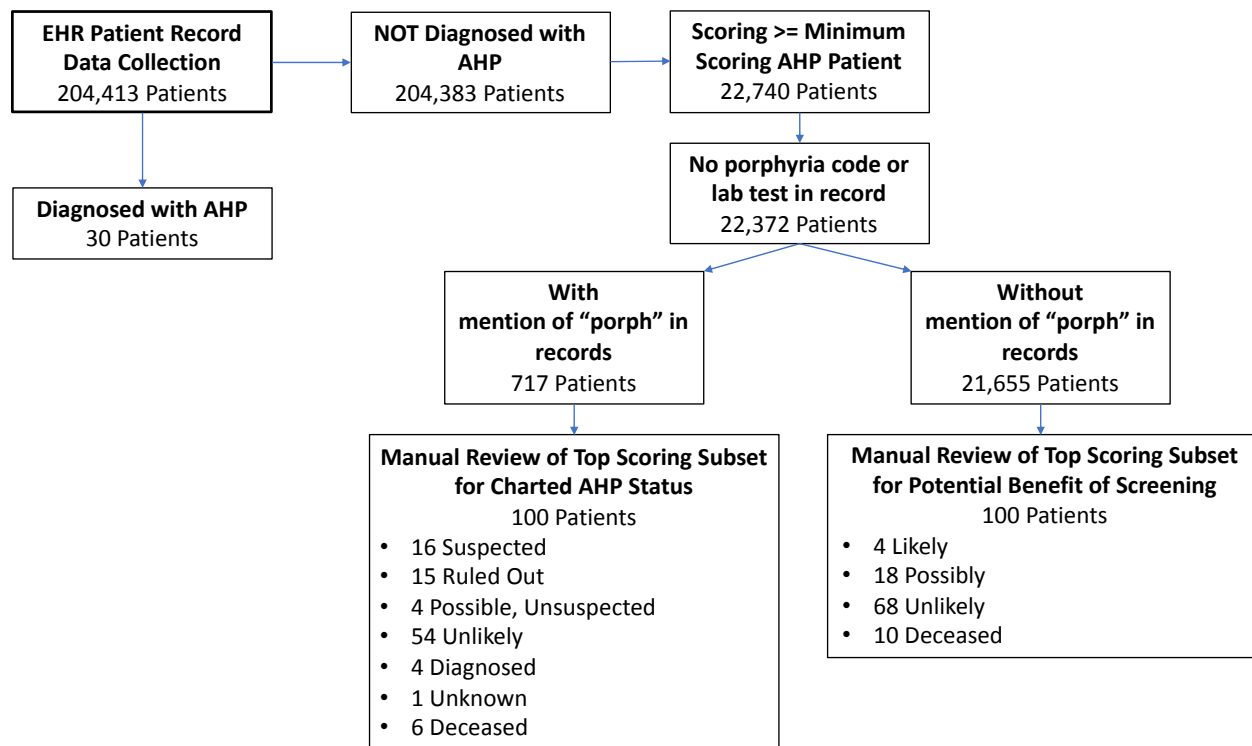

**Figure 1.** Flowchart of patient data record selection. Collection starts from full set of from full collection 204, 413 patient records and is filtered down to two sets of 100 records that were manually reviewed and characterized for 1) present indications for screening for AHP, and 2) status of AHP evaluation in the clinical notes of the record.

## References

1. Meystre S, Lovis C, Bürkle T, Tognola G, Budrionis A, Lehmann C. Clinical data reuse or secondary use: current status and potential future progress. In: Holmes J, Soualmia L, Séroussi B, editors. *Yearbook of Medical Informatics*. 2017. p. 38-52.
2. Anonymous. Rare Diseases Act of 2002. Public Law 107 - 280; 2002 November 6, 2002.
3. Haendel M, Vasilevsky N, Unni D, Bologna C, Harris N, Rehm H, et al. How many rare diseases are there? *Nature Reviews Drug Discovery*. 2019.
4. Ramalle-Gómara E, Ruiz E, Quiñones C, Andrés S, Iruzubieta J, Gil-de-Gómez J. General knowledge and opinion of future health care and non-health care professionals on rare diseases. *Journal of Evaluation in Clinical Practice*. 2015;21:198-201.
5. Garg R, Dong S, Shah S, Jonnalagadda S. A bootstrap machine learning approach to identify rare disease patients from electronic health records. *arXiv.org*. 2016:arXiv:1609.01586.
6. Colbaugh R, Glass K, Rudolf C, Tremblay M, editors. *Learning to identify rare disease patients from electronic health records*. AMIA Annual Symposium Proceedings; 2018; San Francisco, CA.
7. Shen F, Wang L, Liu H. Phenotypic analysis of clinical narratives using human phenotype ontology. *Studies in Health Technology and Informatics*. 2017;245:581-5.
8. Shen F, Liu S, Wang Y, Wen A, Wang L, Liu H. Utilization of electronic medical records and biomedical literature to support the diagnosis of rare diseases using data fusion and collaborative filtering approaches. *JMIR Medical Informatics*. 2018;6(4):e11301.
9. Besur S, Hou W, Schmeltzer P, Bonkovsky H. Clinically important features of porphyrin and heme metabolism and the porphyrias. *Metabolites*. 2014;4:977-1006.
10. Bissell D, Anderson K, Bonkovsky H. Porphyrin. *New England Journal of Medicine*. 2017;377:862-72.
11. Gouya L, Ventura P, Balwani M, Bissell D, Rees D, Penz C, et al. EXPLORE: a prospective, multinational, natural history study of patients with acute hepatic porphyria with recurrent attacks. *Hepatology*. 2019:Epub ahead of print.
12. Ramanujam V, Anderson K. Porphyrin diagnostics – Part 1: a brief overview of the porphyrias. *Current Protocols in Human Genetics*. 2015;86:17.20.1-17.20.6.
13. Szlendak U, Bykowska K, Lipniacka A. Clinical, biochemical and molecular characteristics of the main types of porphyria. *Advances in Clinical and Experimental Medicine*. 2016;25:361-8.
14. Elder G, Harper P, Badminton M, Sandberg S, Deybach J. The incidence of inherited porphyrias in Europe. *Journal of Inherited Metabolic Disease*. 2013;36:849-57.
15. Bonkovsky H, Maddukuri V, Yazici C, Anderson K, Bissell D, Bloomer J, et al. Acute porphyrias in the USA: features of 108 subjects from Porphyrias Consortium. *American Journal of Medicine*. 2014;127:1233-41.
16. Bonkovsky H, Dixon N, Rudnick S. Pathogenesis and clinical features of the acute hepatic porphyrias (AHPs). *Molecular Genetics and Metabolism*. 2019;128:213-8.
17. Chen B, Solis-Villa C, Hakenberg J, Qiao W, Srinivasan R, Yasuda M, et al. Acute intermittent porphyria: predicted pathogenicity of HMBS variants indicates extremely low penetrance of the autosomal dominant disease. *Human Mutation*. 2016;37:1215-22.
18. Anderson K, Bloomer J, Bonkovsky H, JP Kushner, Pierach C, Pimstone N, et al. Recommendations for the diagnosis and treatment of the acute porphyrias. *Annals of Internal Medicine*. 2005;142:439-50.



19. Pischik E, Kauppinen R. An update of clinical management of acute intermittent porphyria. *The Application of Clinical Genetics*. 2015;8:201-14.
20. Anonymous. PANHEMATIN® (hemin for injection) U.S. Prescribing Information. *Recordati Rare Diseases*. 2017:1-14.
21. Anonymous. Drug Trials Snapshots: GIVLAARI. Food & Drug Administration; 2019 November 20, 2019.
22. Sardh E, Harper P, Balwani M, Stein P, Rees D, Bissell D, et al. Phase 1 trial of an RNA interference therapy for acute intermittent porphyria. *New England Journal of Medicine*. 2019;380:549-58.
23. Anderson K. Porphyrias: An overview. *Up To Date* 2019.
24. Cherem J, Malagon J, Nellen H. Cimetidine and acute intermittent porphyria. *Annals of Internal Medicine*. 2005;143:694-5.
25. Cohen A, Smalheiser N, McDonagh M, Yu C, Adams C, Davis J, et al. Automated confidence ranked classification of randomized controlled trial articles: an aid to evidence-based medicine. *Journal of the American Medical Informatics Association*. 2015;22:707-17.
26. Sun Y, Liang D, Wang X, Tang X. Deepid3: Face recognition with very deep neural networks. *arXiv.org*. 2015:arXiv:1502.00873.
27. Kaur H, Pannu H, Malhi A. A systematic review on imbalanced data challenges in machine learning: applications and solutions. *ACM Computing Surveys (CSUR)*. 2019:79.
28. Dhar S, Cherkassky V. Development and evaluation of cost-sensitive universum-SVM. *IEEE Transactions on Cybernetics*. 2014;45:806-18.
29. Haixiang G, Yijing L, Shang J, Mingyun G, Yuanyue H, Bing G. Learning from class-imbalanced data: review of methods and applications. *Expert Systems with Applications*. 2017;73:220-39.

**Supplemental Table 1.** Final 141 features selected for inclusion in the machine learning model to predict acute hepatic porphyria. Features are scored by number of occurrences in an individual patient medical record, and then normalized.

| INDEX | FEATURE                                                                  | SOURCE DOCUMENTS                                                                       | DESCRIPTION                                        |
|-------|--------------------------------------------------------------------------|----------------------------------------------------------------------------------------|----------------------------------------------------|
| 1     | ABDOMINAL_PAIN_DX_NAME                                                   | Encounter<br>Diagnosis,<br>Patient<br>Problem List                                     | Text<br>description of<br>diagnosis code<br>(ICD9) |
| 2     | ABDOMINAL_PAIN_UNSPECIFIED_SITE_DX_NAME                                  | Encounter<br>Diagnosis,<br>Patient<br>Problem List                                     | Text<br>description of<br>diagnosis code<br>(ICD9) |
| 3     | ALTERNATIVE_THERAPY_-<br>_PINEAL_HORMONE_AGENTS_PHARM_SUBCLASS_NAME      | Concomittent<br>Medications,<br>Administered<br>Medications,<br>Medications<br>Ordered | Text<br>description of<br>drug subclass            |
| 4     | ANALGESIC_OPIOID_OXYCODONE_COMBINATIONS_PHARM_SUB<br>CLASS_NAME          | Concomittent<br>Medications,<br>Administered<br>Medications,<br>Medications<br>Ordered | Text<br>description of<br>drug subclass            |
| 5     | ANTI-ANXIETY_- _BENZODIAZEPINES_PHARM_CLASS_NAME                         | Concomittent<br>Medications,<br>Administered<br>Medications,<br>Medications<br>Ordered | Text<br>description of<br>drug class               |
| 6     | ANTICONVULSANT_-<br>_GABA_ANALOGS_PHARM_SUBCLASS_NAME                    | Concomittent<br>Medications,<br>Administered<br>Medications,<br>Medications<br>Ordered | Text<br>description of<br>drug subclass            |
| 7     | ANTIEMETIC_- _PHENOTHIAZINES_PHARM_SUBCLASS_NAME                         | Concomittent<br>Medications,<br>Administered<br>Medications,<br>Medications<br>Ordered | Text<br>description of<br>drug subclass            |
| 8     | ANTIHISTAMINE_- _1ST_GENERATION_-<br>_ETHANOLAMINES_PHARM_SUBCLASS_NAME  | Concomittent<br>Medications,<br>Administered<br>Medications,<br>Medications<br>Ordered | Text<br>description of<br>drug subclass            |
| 9     | ANTIHISTAMINE_- _1ST_GENERATION_-<br>_PHENOTHIAZINES_PHARM_SUBCLASS_NAME | Concomittent<br>Medications,<br>Administered<br>Medications,<br>Medications<br>Ordered | Text<br>description of<br>drug subclass            |
| 10    | BASO_#_COMPONENT_NAME                                                    | Lab Results                                                                            | Percent<br>Basophils<br>performed                  |

|    |                                                            |                                                                         |                                            |
|----|------------------------------------------------------------|-------------------------------------------------------------------------|--------------------------------------------|
| 11 | CALCIUM_REPLACEMENT_PHARM_CLASS_NAME                       | Concomittent Medications, Administered Medications, Medications Ordered | Text description of drug class             |
| 12 | CBC_WITH_DIFFERENTIAL_PROC_NAME                            | Procedures Ordered                                                      | CBC with diff order present                |
| 13 | CNSLT0031_PROC_CODE                                        | Procedures Ordered                                                      | Code for consult to Gastroenterology       |
| 14 | CONSULT_TO_GASTROENTEROLOGY_PROC_NAME                      | Procedures Ordered                                                      | Consult to Gastroenterology ordered        |
| 15 | COPD_(CHRONIC_OBSTRUCTIVE_PULMONARY_DISEASE)_(HCC)_DX_NAME | Encounter Diagnosis, Patient Problem List                               | Text description of diagnosis code (ICD9)  |
| 16 | CREATININE_URINE_CONCENTRATION_COMPONENT_NAME              | Lab Results                                                             | lab result component present               |
| 17 | CREATININEUR(REFERRAL)_COMPONENT_NAME                      | Lab Results                                                             | lab result component present               |
| 18 | DIFFERENTIAL_PROC_NAME                                     | Procedures Ordered                                                      | blood differential order present           |
| 19 | DIPHENHYDRAMINE_HCL_GENERIC_NAME_1                         | Concomittent Medication, Medications Ordered                            | Generic name of medication                 |
| 20 | ELEVATED_WHITE_BLOOD_CELL_COUNT_UNSPECIFIED_DX_ICD10_NAME  | Encounter Diagnosis, Patient Problem List                               | Text description of diagnosis code (ICD10) |
| 21 | EOS_#_COMPONENT_NAME                                       | Lab Results                                                             | eosinaphil count lab result present        |
| 22 | ESSENTIAL_(PRIMARY)_HYPERTENSION_DX_ICD10_NAME             | Encounter Diagnosis, Patient Problem List                               | Text description of diagnosis code (ICD10) |
| 23 | FERRITIN_SERUM_PROC_NAME                                   | Procedures Ordered                                                      | serum ferritin order present               |
| 24 | HYDROMORPHONE_HCL_GENERIC_NAME_1                           | Concomittent Medication, Medications Ordered                            | Generic name of medication                 |
| 25 | LAB00047_PROC_CODE                                         | Procedures Ordered                                                      | Plasma lipase procedure ordered            |
| 26 | LAB00364_PROC_CODE                                         | Procedures Ordered                                                      | Microscopic urine exam ordered             |

|    |                                                                                            |                                                                         |                                                     |
|----|--------------------------------------------------------------------------------------------|-------------------------------------------------------------------------|-----------------------------------------------------|
| 27 | LAB00681_PROC_CODE                                                                         | Procedures Ordered                                                      | CBC with differential ordered                       |
| 28 | LAB100107_PROC_CODE                                                                        | Procedures Ordered                                                      | Blood differential ordered                          |
| 29 | LAB100227_PROC_CODE                                                                        | Procedures Ordered                                                      | Urine volume measurement ordered                    |
| 30 | LAB100882_PROC_CODE                                                                        | Procedures Ordered                                                      | Multi-tube blood draw ordered                       |
| 31 | LIPASE__(LAB)_COMPONENT_NAME                                                               | Lab Results                                                             | plasma lipase result component present              |
| 32 | LIPASE_PLASMA_PROC_NAME                                                                    | Procedures Ordered                                                      | plasma lipase order present                         |
| 33 | LYMPHOCYTE_#_COMPONENT_NAME                                                                | Lab Results                                                             | blood lymphocyte count results present              |
| 34 | MAGNESIUM_SALTS_REPLACEMENT_PHARM_CLASS_NAME                                               | Concomittent Medications, Administered Medications, Medications Ordered | Text description of drug class                      |
| 35 | MELATONIN_GENERIC_NAME_1                                                                   | Concomittent Medication, Medications Ordered                            | Generic name of medication                          |
| 36 | MINERALS_AND_ELECTROLYTES_-_CALCIUM_REPLACEMENT/VITAMIN_D_COMBINATIONS_PHARM_SUBCLASS_NAME | Concomittent Medications, Administered Medications, Medications Ordered | Text description of drug subclass                   |
| 37 | MISC_REF_TEST_NAME_COMPONENT_NAME                                                          | Lab Results                                                             | Special test given with name of test in RESULT_TEXT |
| 38 | MISC_REF_TEST_RESULT_COMPONENT_NAME                                                        | Lab Results                                                             | Result of special test present                      |
| 39 | MONOCYTE_#_COMPONENT_NAME                                                                  | Lab Results                                                             | blood monocyte count results present                |
| 40 | NAUSEA_WITH_VOMITING_UNSPECIFIED_DX_ICD10_NAME                                             | Encounter Diagnosis, Patient Problem List                               | Text description of diagnosis code (ICD10)          |
| 41 | NEUTROPHIL_#_COMPONENT_NAME                                                                | Lab Results                                                             | blood neutrophil count results present              |
| 42 | NGRAM_0^pramipexole                                                                        | Notes                                                                   | Bigram of [token]^[token]                           |

|    |                               |       |                                               |
|----|-------------------------------|-------|-----------------------------------------------|
|    |                               |       | found in free text.                           |
| 43 | NGRAM_0^tablet                | Notes | Bigram of [token]^[token] found in free text. |
| 44 | NGRAM_10^olanzapine           | Notes | Bigram of [token]^[token] found in free text. |
| 45 | NGRAM_10^tablet               | Notes | Bigram of [token]^[token] found in free text. |
| 46 | NGRAM_100^sodium              | Notes | Bigram of [token]^[token] found in free text. |
| 47 | NGRAM_4^mg                    | Notes | Bigram of [token]^[token] found in free text. |
| 48 | NGRAM_4^odt                   | Notes | Bigram of [token]^[token] found in free text. |
| 49 | NGRAM_90^albuterol            | Notes | Bigram of [token]^[token] found in free text. |
| 50 | NGRAM_abdominal               | Notes | Unigram of [token] found in free text.        |
| 51 | NGRAM_abdominal^pain          | Notes | Bigram of [token]^[token] found in free text. |
| 52 | NGRAM_acute                   | Notes | Unigram of [token] found in free text.        |
| 53 | NGRAM_acute^distress          | Notes | Bigram of [token]^[token] found in free text. |
| 54 | NGRAM_ambulatory              | Notes | Unigram of [token] found in free text.        |
| 55 | NGRAM_antibiotics             | Notes | Unigram of [token] found in free text.        |
| 56 | NGRAM_antibiotics^sulfonamide | Notes | Bigram of [token]^[token] found in free text. |
| 57 | NGRAM_atraumatic              | Notes | Unigram of [token] found in free text.        |
| 58 | NGRAM_bipolar                 | Notes | Unigram of [token] found in free text.        |

|    |                       |       |                                                |
|----|-----------------------|-------|------------------------------------------------|
| 59 | NGRAM_cigarettes      | Notes | Unigram of [token] found in free text.         |
| 60 | NGRAM_compazine       | Notes | Unigram of [token] found in free text.         |
| 61 | NGRAM_control^pain    | Notes | Bigram of [token]^ [token] found in free text. |
| 62 | NGRAM_depakote        | Notes | Unigram of [token] found in free text.         |
| 63 | NGRAM_dilaudid        | Notes | Unigram of [token] found in free text.         |
| 64 | NGRAM_discharged      | Notes | Unigram of [token] found in free text.         |
| 65 | NGRAM_disintegrating  | Notes | Unigram of [token] found in free text.         |
| 66 | NGRAM_docusate        | Notes | Unigram of [token] found in free text.         |
| 67 | NGRAM_docusate^sodium | Notes | Bigram of [token]^ [token] found in free text. |
| 68 | NGRAM_dose^oral       | Notes | Bigram of [token]^ [token] found in free text. |
| 69 | NGRAM_duloxetine      | Notes | Unigram of [token] found in free text.         |
| 70 | NGRAM_ed              | Notes | Unigram of [token] found in free text.         |
| 71 | NGRAM_edisylate]      | Notes | Unigram of [token] found in free text.         |
| 72 | NGRAM_extended^tablet | Notes | Bigram of [token]^ [token] found in free text. |
| 73 | NGRAM_fibromyalgia    | Notes | Unigram of [token] found in free text.         |
| 74 | NGRAM_flare           | Notes | Unigram of [token] found in free text.         |
| 75 | NGRAM_flares          | Notes | Unigram of [token] found in free text.         |
| 76 | NGRAM_focal           | Notes | Unigram of [token] found in free text.         |
| 77 | NGRAM_gallops         | Notes | Unigram of [token] found in free text.         |

|    |                           |       |                                                |
|----|---------------------------|-------|------------------------------------------------|
| 78 | NGRAM_genitourinary       | Notes | Unigram of [token] found in free text.         |
| 79 | NGRAM_glycol              | Notes | Unigram of [token] found in free text.         |
| 80 | NGRAM_glycol^polyethylene | Notes | Bigram of [token]^ [token] found in free text. |
| 81 | NGRAM_gram                | Notes | Unigram of [token] found in free text.         |
| 82 | NGRAM_hydromorphone       | Notes | Unigram of [token] found in free text.         |
| 83 | NGRAM_instructed          | Notes | Unigram of [token] found in free text.         |
| 84 | NGRAM_iv                  | Notes | Unigram of [token] found in free text.         |
| 85 | NGRAM_latex               | Notes | Unigram of [token] found in free text.         |
| 86 | NGRAM_magnesium           | Notes | Unigram of [token] found in free text.         |
| 87 | NGRAM_melatonin           | Notes | Unigram of [token] found in free text.         |
| 88 | NGRAM_miralax             | Notes | Unigram of [token] found in free text.         |
| 89 | NGRAM_mouth^needed        | Notes | Bigram of [token]^ [token] found in free text. |
| 90 | NGRAM_mouth^twelve        | Notes | Bigram of [token]^ [token] found in free text. |
| 91 | NGRAM_nausea              | Notes | Unigram of [token] found in free text.         |
| 92 | NGRAM_nausea^vomiting     | Notes | Bigram of [token]^ [token] found in free text. |
| 93 | NGRAM_odt                 | Notes | Unigram of [token] found in free text.         |
| 94 | NGRAM_odt^ondansetron     | Notes | Bigram of [token]^ [token] found in free text. |
| 95 | NGRAM_olanzapine          | Notes | Unigram of [token] found in free text.         |

|     |                    |       |                                                |
|-----|--------------------|-------|------------------------------------------------|
| 96  | NGRAM_oncology     | Notes | Unigram of [token] found in free text.         |
| 97  | NGRAM_ondansetron  | Notes | Unigram of [token] found in free text.         |
| 98  | NGRAM_oral^powder  | Notes | Bigram of [token]^ [token] found in free text. |
| 99  | NGRAM_oxycodone    | Notes | Unigram of [token] found in free text.         |
| 100 | NGRAM_pain^severe  | Notes | Bigram of [token]^ [token] found in free text. |
| 101 | NGRAM_pathology    | Notes | Unigram of [token] found in free text.         |
| 102 | NGRAM_penicillins  | Notes | Unigram of [token] found in free text.         |
| 103 | NGRAM_phenergan    | Notes | Unigram of [token] found in free text.         |
| 104 | NGRAM_polyethylene | Notes | Unigram of [token] found in free text.         |
| 105 | NGRAM_powder       | Notes | Unigram of [token] found in free text.         |
| 106 | NGRAM_pramipexole  | Notes | Unigram of [token] found in free text.         |
| 107 | NGRAM_propranolol  | Notes | Unigram of [token] found in free text.         |
| 108 | NGRAM_protocol     | Notes | Unigram of [token] found in free text.         |
| 109 | NGRAM_psychosis    | Notes | Unigram of [token] found in free text.         |
| 110 | NGRAM_risperidone  | Notes | Unigram of [token] found in free text.         |
| 111 | NGRAM_rubs         | Notes | Unigram of [token] found in free text.         |
| 112 | NGRAM_scoliosis    | Notes | Unigram of [token] found in free text.         |
| 113 | NGRAM_seroquel     | Notes | Unigram of [token] found in free text.         |
| 114 | NGRAM_severe       | Notes | Unigram of [token] found in free text.         |



|     |                                                           |                                                                         |                                            |
|-----|-----------------------------------------------------------|-------------------------------------------------------------------------|--------------------------------------------|
| 115 | NGRAM_stomach                                             | Notes                                                                   | Unigram of [token] found in free text.     |
| 116 | NGRAM_sulfa                                               | Notes                                                                   | Unigram of [token] found in free text.     |
| 117 | NGRAM_sulfonamide                                         | Notes                                                                   | Unigram of [token] found in free text.     |
| 118 | NGRAM_urine                                               | Notes                                                                   | Unigram of [token] found in free text.     |
| 119 | NGRAM_vicodin                                             | Notes                                                                   | Unigram of [token] found in free text.     |
| 120 | NGRAM_zofran                                              | Notes                                                                   | Unigram of [token] found in free text.     |
| 121 | NORMAL_RANGE_COMPONENT_NAME                               | Lab Results                                                             | Lab test result within normal ranges       |
| 122 | OBSTRUCTIVE_SLEEP_APNEA_(ADULT)_(PEDIATRIC)_DX_ICD10_NAME | Encounter Diagnosis, Patient Problem List                               | Text description of diagnosis code (ICD10) |
| 123 | OBSTRUCTIVE_SLEEP_APNEA_DX_NAME                           | Encounter Diagnosis, Patient Problem List                               | Text description of diagnosis code (ICD9)  |
| 124 | ONDANSETRON_HCL_GENERIC_NAME_1                            | Concomittent Medication, Medications Ordered                            | Generic name of medication                 |
| 125 | OXYCODONE_HCL/ACETAMINOPHEN_GENERIC_NAME_1                | Concomittent Medication, Medications Ordered                            | Generic name of medication                 |
| 126 | PATHOLOGY_PROC_NAME                                       | Procedures Ordered                                                      | Transcribed pathology report present       |
| 127 | PELVIC_AND_PERINEAL_PAIN_DX_ICD10_NAME                    | Encounter Diagnosis, Patient Problem List                               | Text description of diagnosis code (ICD10) |
| 128 | PINEAL_HORMONE_AGENTS_PHARM_CLASS_NAME                    | Concomittent Medications, Administered Medications, Medications Ordered | Text description of drug subclass          |
| 129 | PROCHLORPERAZINE_EDISYLATE_GENERIC_NAME_1                 | Concomittent Medication, Medications Ordered                            | Generic name of medication                 |
| 130 | PROMETHAZINE_HCL_GENERIC_NAME_1                           | Concomittent Medication, Medications Ordered                            | Generic name of medication                 |

|     |                                          |                                           |                                            |
|-----|------------------------------------------|-------------------------------------------|--------------------------------------------|
| 131 | RADIOLOGY_PROC_NAME                      | Procedures Ordered                        | Transcribed radiology report present       |
| 132 | RAINBOW_HOLD_TUBE_- _BLUE_TOP_PROC_NAME  | Procedures Ordered                        | Multi-tube blood draw ordered              |
| 133 | RESTLESS_LEGS_SYNDROME_DX_ICD10_NAME     | Encounter Diagnosis, Patient Problem List | Text description of diagnosis code (ICD10) |
| 134 | TOBACCO_ABUSE_DX_NAME                    | Encounter Diagnosis, Patient Problem List | Text description of diagnosis code (ICD9)  |
| 135 | TRIPLE_P04_CRYSTALS_COMPONENT_NAME       | Lab Results                               | Component of result of lab test            |
| 136 | TRNS00039_PROC_CODE                      | Procedures Ordered                        | Transcribed pathology report present       |
| 137 | TRNS00040_PROC_CODE                      | Procedures Ordered                        | Transcribed imaging report present         |
| 138 | UNSPECIFIED ABDOMINAL PAIN_DX_ICD10_NAME | Encounter Diagnosis, Patient Problem List | Text description of diagnosis code (ICD10) |
| 139 | UNSPECIFIED ABDOMINAL PAIN_DX_ICD10_NAME | Encounter Diagnosis, Patient Problem List | Text description of diagnosis code (ICD10) |
| 140 | URINE_MICROSCOPIC_EXAM_PROC_NAME         | Lab Results                               | Name of lab test procedure                 |
| 141 | VOL(URINE)_PROC_NAME                     | Lab Results                               | Name of lab test procedure                 |

**Detecting Rare Diseases in Electronic Health Records Using Machine Learning and Knowledge Engineering: Case Study of Acute Hepatic Porphyrria**

Aaron Cohen, MD, MS <sup>1\*</sup>  
Steven Chamberlin, ND <sup>1</sup>  
Thomas Deloughery, MD <sup>1</sup>  
Michelle Nguyen, BS <sup>1</sup>  
Steven Bedrick, PhD <sup>1</sup>  
Stephen Meninger, PharmD <sup>2</sup>  
John J. Ko, PharmD, MS <sup>2</sup>  
Jigar Amin, PharmD <sup>2</sup>  
Alex Wei, PharmD <sup>2</sup>  
William Hersh, MD <sup>1</sup>

<sup>1</sup>Department of Medical Informatics & Clinical Epidemiology, School of Medicine, Oregon Health & Science University, Portland, OR USA.

<sup>2</sup>Anylam Pharmaceuticals, Cambridge, MA, USA.

\* Corresponding Author:  
Aaron M. Cohen, MD MS  
Professor  
Department of Medical Informatics & Clinical Epidemiology  
School of Medicine  
Oregon Health & Science University  
Portland, Oregon USA 97239  
Email: cohenaa@ohsu.edu

## Abstract

### Background

With the growing adoption of the electronic health record (EHR) worldwide over the last decade, new opportunities exist for leveraging EHR data for detection of rare diseases. Rare diseases are often not diagnosed or delayed in diagnosis by clinicians who encounter them infrequently. One such rare disease that may be amenable to EHR-based detection is acute hepatic porphyria (AHP). AHP consists of a family of rare, metabolic diseases characterized by potentially life-threatening acute attacks and, for some patients, chronic debilitating symptoms that negatively impact daily functioning and quality of life. The goal of this study was to apply machine learning and knowledge engineering to a large extract of EHR data to determine whether they could be effective in identifying patients not previously tested for AHP who should receive a proper diagnostic workup for AHP.

### Methods and Findings

We used an extract of the complete EHR data of 200,000 patients from an academic medical center for up to 10 years longitudinally and enriched it with records from an additional 5,571 patients from the center containing any mention of porphyria in notes, laboratory tests, diagnosis codes, and other parts of the record. After manually reviewing [the records of all 47 unique](#) patients with the ICD-10-CM code E80.21 (Acute intermittent [hepatic] porphyria), we identified 30 patients who were positive cases for our machine learning models, with the rest of the patients used as negative cases. We parsed the record into features, which were scored by frequency of appearance and labeled by the EHR source document. We then carried out a univariate feature analysis, manually choosing features not directly tied to provider attributes or suspicion of the patient having AHP. We next trained on the full dataset, with the best cross-validation performance coming from support vector machine (SVM) algorithm using a radial basis function (RBF) kernel. The trained model was applied back to the full data set and patients were ranked by margin distance. The top 100 ranked negative cases were manually reviewed for symptom complexes similar to AHP, finding four patients where AHP diagnostic testing was likely indicated and 18 patients where AHP diagnostic testing was possibly indicated. From the top 100 ranked cases of patients with mention of porphyria in their record, we identified four patients for whom AHP diagnostic testing was possibly indicated and had not been previously performed. Based solely on the reported prevalence of AHP, we would have expected only 0.002 cases out of the 200 patients manually reviewed.

### Conclusions

The application of machine learning and knowledge engineering to EHR data may facilitate the diagnosis of rare diseases such as AHP. The only manual modifications to this work were the removal of disease-specific or medical center specific features that might undermine our ability to find new cases. Further work will recommend clinical investigation to identified patients' clinicians, evaluate more patients, assess additional feature selection and machine learning algorithms, and apply this methodology to other rare diseases.

## Introduction

The growing adoption of the electronic health record (EHR) worldwide has created new opportunities for leveraging EHR data for other, so called *secondary* purposes, such as clinical and translational research, quality measurement and improvement, patient cohort identification and more {Meystre, 2017 #10530}. One emerging use case for leveraging of EHR data is to detect undiagnosed rare diseases. Although there is no absolute definition of a rare disease, the US Rare Diseases Act of 2002 defines rare diseases as those that occur in fewer than 200,000 patients worldwide {Anonymous, 2002 #11601}, and the National Organization for Rare Disorders (NORD, <https://rarediseases.org/>) registry lists more than 1,200 diseases. Others have noted that the true number of rare diseases is unknown, and have called for more research to define them {Haendel, 2019 #11646}.

Rare diseases can be difficult to diagnose because their infrequent occurrence may result in primary care physicians not considering them in diagnostic workups {Ramalle-Gómara, 2015 #12199}. They also often have general presentations with diffuse symptoms, as well as genetic components which may require specialized testing. This lack of timely diagnosis may lead to both physical and emotional suffering as patients remain undiagnosed for prolonged periods. Additionally, a lack of accurate diagnoses increases economic burden to healthcare systems as patients continue to receive inadequate and/or inappropriate treatment. Some informatics researchers have used EHR data to detect rare diseases, such as cardiac amyloidosis {Garg, 2016 #11604}, lipodystrophy {Colbaugh, 2018 #11605}, and a large collection of different diseases {Shen, 2017 #11607; Shen, 2018 #11606}.

One rare disease that may be amenable to EHR-based detection is acute hepatic porphyria (AHP). AHP is a subset of porphyria that refers to a family of rare, metabolic diseases characterized by potentially life-threatening acute attacks and, for some patients, chronic debilitating symptoms that negatively impact daily functioning and quality of life {Besur, 2014 #11907; Bissell, 2017 #11905; Gouya, 2019 #11908; Ramanujam, 2015 #11904; Szlendak, 2016 #11906}. During attacks, patients typically present with multiple signs and symptoms due to dysfunction across the autonomic, central, and peripheral nervous systems. The prevalence of diagnosed symptomatic AHP patients is ~1 per 100,000 {Elder, 2013 #11603}. Due to the nonspecific symptoms and the rare nature of the disease, AHP is often initially overlooked or misdiagnosed. A U.S. study demonstrated that diagnosis of AHP is delayed on average by up to 15 years {Bonkovsky, 2014 #11659}.

AHP is predominantly caused by a genetic mutation leading to a partial deficiency in the activity of one of the eight enzymes responsible for heme synthesis {Ramanujam, 2015 #11904}. These defects predispose patients to the accumulation of neurotoxic heme intermediates aminolevulinic acid (ALA) and porphobilinogen (PBG) when the rate limiting enzyme of the heme synthesis pathway, aminolevulinic acid synthase 1 (ALAS1), is induced {Bissell, 2017 #11905; Bonkovsky, 2019 #11909}. Gene mutations causing the disease are mostly autosomal dominant, however the disease has low penetrance (~1%) and many specific mutations have not been identified {Chen, 2016 #11910}. Furthermore, families carrying the gene may have few or only one affected member. Therefore, family history can be a poor diagnostic tool for this

disease. The preferred diagnostic procedure for AHP is biochemical testing of random/spot urine for ALA, PBG, and porphyrins {Anderson, 2005 #11911;Pischik, 2015 #11912}.

Historically, treatment of AHP has predominantly focused on avoidance of attack triggers, management of pain and other chronic symptoms, and treatment of acute attacks through the use of Panhematin® (hemin for injection) {Anonymous, 2017 #11913}. Panhematin was FDA approved in 1983 for the amelioration of recurrent attacks of acute intermittent porphyria (AIP) temporally related to the menstrual cycle in susceptible women after initial carbohydrate therapy is known or suspected to be inadequate {Anonymous, 2017 #11913}.

Recently, a new drug Givlaari® (givosiran), for subcutaneous injection has been approved by the FDA for the treatment of adults with AHP {Anonymous, 2019 #11914}. Givosiran is a double-stranded small interfering RNA (siRNA) molecule that reduces induced levels of the protein ALAS1. A Phase 1 trial has been published {Sardh, 2019 #11562} and a Phase 3 randomized control trial has shown this therapy to be effective in reducing the occurrence of acute attacks and impacting other manifestations of the disease {Anonymous, 2019 #11914}.

~~Oregon Health & Science University (OHSU) is the only academic medical center in Oregon and is thus a referral center for rare diseases like AHP. The OHSU Research Data Warehouse (RDW) is a research data “honest broker” service that provides EHR data to researchers, with appropriate IRB approval. The investigators have an ongoing institutional review board (IRB) approval to use an extract from the Oregon Health & Science University (OHSU) EHR research data warehouse (RDW) for a series of patient cohort identification projects. For this research, the patient cohort to identify was defined as those patients who have a documented clinical history of AHP, or a clinical history indicating that AHP diagnostic testing may be appropriate. The goal of this study was to apply machine learning and knowledge engineering to a large extract of EHR data to determine whether the combined approach could be effective in identifying patients not previously tested for AHP who should receive a proper diagnostic workup for AHP.~~

## Materials and Methods

This study protocol was approved by the OHSU Institutional Review Board (IRB00011159).

### Dataset

Oregon Health & Science University (OHSU) is the only academic medical center in Oregon and is thus a referral center for rare diseases like AHP. The OHSU Research Data Warehouse (RDW) is a research data “honest broker” service that provides EHR data to researchers, with appropriate IRB approval. The investigators have an ongoing institutional review board (IRB) approval to use an extract from the Oregon Health & Science University (OHSU) EHR research data warehouse (RDW) for a series of patient cohort identification projects. For this research, the patient cohort to identify was defined as those patients who have a documented clinical history of AHP, or a clinical history indicating that AHP diagnostic testing may be appropriate. The goal of this study was to apply machine learning and knowledge engineering to a large extract of EHR data to determine whether the combined approach could be effective in identifying patients not previously tested for AHP who should receive a proper diagnostic workup for AHP.

Commented [AMC1]: Revise or keep?

#### Reviewer comment:

While this is important background information, it's not clear if this paragraph is needed in the paper, other than noting the diagnostic/prognostics should rely on biomarker and other lab tests rather than family history. Consider removing, or condensing

Currently our response is to keep the text and add to the cover letter:

This text is important to provide the patient disease context for our work, and provides a bit of additional clinical and genetic background to orient readers who may not have the detailed expertise about this disease, such as informaticians and machine learning researchers. The difficult diagnosis of AHP is in part due to the disease low penetrance and inconsistent appearances in families even though AHP and related diseases are mostly autosomal dominant.

Formatted: Normal

A large dataset of approximately 200,000 patient records was requested from the RDW, complete as of the data pull date in March 2019, including over 30 million text notes plus other document types. ~~The data set goes back to the start of OHSU using our current~~ the Epic EHR system in January, 2009. These records ~~corresponded to consist of all~~ patients who had more than one primary care health care visit at our institution. Each patient record was represented as a collection of documents of types given in **Table 1**. Patient records could include zero or more documents of each type.

Commented [AMC2]: Bill do you have a date we can add here?

Commented [AMC3]: Bill do you have a date here or can you revise this sentence?

To insure an adequate ~~number of number of patients~~ sample size to make predictive models robust, we enriched the data set for possible AHP by adding records from an additional 5,571 patients who met one or more of the following case-insensitive criteria (see **Table 2**):

- Diagnosis including the wildcard search term “porph\*” in the diagnosis name
- Medication including the wildcard search term “hemin\*” in the medication name
- Procedure including the wildcard search term “porph\*” in the procedure name
- Clinical or result note including the wildcard search term “porph\*” in the note text

To develop a gold standard for the data, a medical student (MN), overseen by clinical experts among the rest of the authors, conducted a chart review to identify patients with a ~~high likelihood confirmed diagnosis~~ of AHP. We manually reviewed all the patients with the ICD-10-CM code E80.21 (Acute intermittent [hepatic] porphyria) in their record, looking for positive confirmation of AHP either through a lab test or a specific comment in a progress note. This process yielded 30 positive cases from the 47 coded for E80.21. As OHSU is the only academic medical center in Oregon and is thus a referral center for rare diseases like AHP, this may explain why the number of identified AHP patients in our database was higher than that which would be expected based on the global prevalence of AHP. For the remaining 17 records, we could not confirm by chart review the diagnosis of AHP. This may be due to the code being attached to the patient based on an encounter to rule out AHP, inaccurate past medical history data, or a charting error. For these 17 patients no additional information supporting the AHP diagnosis was found in the notes, clinical tests or medication records and the only evidence of AHP was an ICD-10-CM code at one place in the medical record.

The rest of the records were then assumed to be negative for AHP for the purposes of statistical analysis and machine learning. The data set consisted of the positive records plus the presumed negative records. The entire data set was used for statistical analysis and training the machine learning models, the final goal of which was to identify the presumed negative records which are actually likely to be positive.

We then deconstructed each patient record into a number of features to be used for machine learning. Structured data fields were encoded directly with the entire field content used as the feature. Free-text fields were parsed into unigrams and bigrams.

All features were labeled with their source document fields. This enabled, for example, diagnosis names in ICD-10-CM code fields in the problem list to be distinguished from the same ~~ICD-10-CM codes appearing in an encounter diagnosis~~ text appearing in free text notes. Feature values were encoded as the number of occurrences in the entire record for the patient. A summary of the types and counts of documents in the data set is shown in **Table 3**.

Commented [AMC4]: Needed to fix this because what we said before was not quite correct.

## Machine Learning Model Feature Selection and Training

### Feature Selection and Machine Learning Methods

Features to be included in the machine learning model were selected by performing univariate logistic regression analysis of the entire feature set, using the confirmed AHP patients as positive samples and the rest of the data set as negative samples. For each document type, the 100 top features were chosen, ranked by odds ratio, having a p-value < 0.01 and occurring in at least 4 positive case patient records. This statistical criteria was used to establish which data elements had a significant relationship between the outcome variable, which was the presence, or not, of a confirmed diagnosis of AHP. Requiring that included features have at least four positive case patient records was chosen as a filter to strike a balance between only keeping the most common features, and keeping thousands of rare features requiring manual review that were unlikely to be helpful in a generalized model.

From these several hundred features, a manual review process was performed to ensure that none of these features were directly connected to a diagnosis of AHP, mention of AHP in the record, or treatment of AHP. This was done by inspection. This process eliminated all text features mentioning any bigram of “acute hepatic porphyria,” medications such as hematin, and laboratory codes that in the OHSU system represented tests specifically for the diagnosis of porphyria.

The remaining features were then evaluated by using them in a machine learning model and scoring the model using 5 repetitions of 2-fold cross-validation. Several SVM kernel functions were tested including linear, polynomial degree 2, and the radial basis function (RBF), random forests, Adaboost, J48, and several topologies of Neural Network. Two normalization encoding methods were tried as well, binary, linear and log normalizing feature occurrence counts between 0.0 and 1.0.

After algorithm selection, a second round of feature screening was performed. Any features with non-zero algorithm weights were removed if any direct connection to AHP could be established. This was performed by close scrutiny and discussion with our clinical expert for each feature. This second pass incorporated a higher level of clinical expertise than the first pass. It was performed after filtering by machine learning weights in order to reduce the screening load on our clinical expert.

Features to be included in the machine learning model were then selected by performing univariate analysis of the entire feature set, using the confirmed AHP patients as positive samples and the rest of the data set as negative samples. For each document type, the 100 top features were chosen, ranked by odds ratio, having a p-value < 0.01 and occurring in at least 4 positive case patient records.

From these several hundred features, a manual review process was performed to ensure that none of these features were directly connected to a diagnosis of AHP, mention of AHP in the record, or treatment of AHP. This process eliminated all text features mentioning any bigram of “acute hepatic porphyria,” medications such as hematin, and laboratory codes that in the OHSU system represented tests specifically for the diagnosis of porphyria.

**Commented [AMC5]:** The Materials and Methods section requires considerable revision. Please only report the methods employed to study the hypothesis of the study- results from any analyses, including model building and sensitivity analyses, should be reported in the Results section. The outcome variable is not clearly defined, although the authors do note they rank features but univariate odds ratios, which I assume are represent the likelihood of a patient being diagnosed for AHP. The methods should include clear rationale for why a particular method was employed. If experiments are performed to further refine a model, the methods should be stated in this section, followed by the results of the methods in the results section. Machine Learning methods can be iterative, and may require manual review and revisions for model building, but this should be clearly outlined in the methods (e.g. how and why it is applied to the data



This process reduced the set to approximately 200 features. These features were then evaluated by using them in a machine learning model and scoring the model using 5 repetitions of 2 fold cross validation. These experiments found that an SVM with the radial basis function (RBF) kernel scored best for the ranking metrics AUC and average precision. Linear SVM, random forests, Adaboost, J48, and several topologies of Neural Network were also tried but failed to perform as well as the RBF SVM. It was also determined that feature values were best encoded using log normalization, transforming feature occurrence counts into values between 0.0 and 1.0. Binary encoding, as well as linear normalization, failed to perform as well. We used the SVMlight implementation of the RBF kernel. Experimentation with cross validation showed  $\gamma = 0.04$  to be optimal.

After algorithm selection, a second round of feature screening was performed. Any features with non-zero weights in the SVM model were removed if any direct connection to AHP could be established. This was performed by close scrutiny and discussion with clinical experts on each feature. For example, based on case series evidence, clinical hematology AHP specialists sometimes use cimetidine to treat AHP symptoms, as it is known to block a portion of the heme synthesis pathway as a side effect (Cherem, 2005 #11660). We found that cimetidine was a highly weighted feature in our initial models (due to its use by a specialist [TD] at OHSU based on case report data (Cherem, 2005 #11660)) that had to be removed as it is given in response to AHP rather than being predictive. This process resulted in 146 total features being included in the final model.

The 146 features included in the final model are shown in Table S-1. Final feature set cross-validation performance on the entire training set is shown in Table 4.

Commented [AMC6]: Move to results, not methods

#### Machine Learning for AHP Prediction and Evaluation Methodology

A final trained model using the features selected was created by training the selected algorithm with chosen parameter settings on the entire data set. This model was then applied back to the entire data set in order to create an AHP prediction score for each patient. The classifier margin distance taken as the prediction score.

The patient prediction scores were then analyzed. To keep the manual chart review process manageable, we could not review every patient. In particular, the range of scores obtained for the 30 confirmed positive training cases were compared to the rest of the patients in the data set. About 22,000 patients in the general population had scores that overlapped with those of the 30 positive patients. While this was only 10% of the patient records, it was more than could be manually reviewed. We decided to review the top scoring 100 cases manually from each of two subsets of the general population.

The first reviewed subset of 100 patients were those with no mention of porphyria in their chart, no related ICD-9-CM or ICD-10-CM codes, and no porphyria specific lab test. We selected the top scoring 100 patients that met these criteria. This represents the most important target population for our project – patients with persistent symptoms that have not had AHP considered and tested to rule it in or out as a diagnosis. Manual review of these cases is intended to demonstrate the potential of our proposed approach to identify potential cases of AHP that would benefit from diagnostic testing and follow up.

The second reviewed subset of 100 patients were those with a mention of porphyria in the text notes in their chart, but no related ICD-9-CM or ICD-10-CM diagnosis codes, and no porphyria-

specific lab test. These are patients where porphyria may have been considered by the clinician, or may have been tested at another health care facility with unavailable records, or may have been a work up in progress. Manual review of these cases was intended to discern the clinical face validity of the algorithmic predictions, that is, the high scoring patients in this group score high because the algorithm is paying attention to some of the same non-AHP-specific clinical symptoms and other variables as the clinician. While the manual review of these patients was primarily intended for gaining insight into how the algorithm was scoring patients with porphyria mentioned in the charts, based on the manual review some patients who may benefit from diagnostic testing could be found.

A clinically trained reviewer assessed the patients' records in these two non-overlapping subsets for symptom patterns consistent with acute hepatic porphyria (AHP). The reviewer was blinded to the model features. Clinical notes were searched for the 'classic triad' of AHP symptoms: abdominal pain, central nervous system abnormalities, and peripheral neuropathy {Anderson, 2019 #11643}. In addition, any report of pain was assessed, and searches were also conducted for the highest incident AHP symptoms: abdominal pain, vomiting, constipation, muscle weakness, psychiatric symptoms, limb, head, neck, or chest pain, hypertension, tachycardia, convulsion, sensory loss, fever, respiratory paralysis, diarrhea {Anderson, 2019 #11643}. All major comorbidities were also reviewed and documented, as well as alternative diagnoses to explain AHP symptom profiles.

The 100 patients with no mention of porphyria in their EHR record were classified into one of three categories: *AHP diagnostic testing likely indicated*, *AHP diagnostic testing possibly indicated*, and *AHP diagnostic testing unlikely indicated*. To be classified as *likely*, symptoms had to be present in all three categories of the 'classic triad', without a cause identified in the EHR, and with a substantial history of symptoms. To be classified as *possibly*, symptoms had to be present in at least one of the three categories, without a cause documented and with a substantial history. Patients were classified as *unlikely* if their symptoms could be explained by another diagnosis, or if they did not have a strong AHP symptom profile.

The 100 patients who did have a mention of porphyria in their clinical notes were classified into one of five categories of AHP status based on chart review and details in the clinical notes: *AHP already suspected*, *AHP already suspected but ruled out*, *diagnostic testing likely indicated but AHP not suspected*, *unlikely AHP*, and *AHP diagnosis mentioned in notes*. A patient was classified as *AHP already suspected* if there was any level of AHP suspicion mentioned in their clinical notes, without a formal diagnosis or lab test. *AHP already suspected but ruled out* was assigned if there was a suspicion of AHP in the note, but had been ruled out, usually by negative lab tests. These lab tests were only documented in the note, since we excluded patients from this subset who had lab tests in the laboratory data itself. *Diagnostic testing likely indicated but AHP not suspected* was assigned if there were symptoms present in at least one of the three triad categories, without a cause, but no suspicion of AHP mentioned in the notes. For these patients the clinical notes contained the string 'porph' but presence of 'porph' in the clinical note was not related to suspicion of AHP. *Unlikely AHP* was assigned if AHP type symptoms could be explained by another diagnosis, or there was not a strong AHP symptom profile. Finally, patients were assigned to *AHP diagnosis* if there was any mention of an existing AHP diagnosis in the notes, even patient reported. The reasons for the presence of the string 'porph' in the clinical note for the second set of 100 patients was also reviewed and documented. Patient's categorized as *AHP already suspected* and *Diagnostic testing likely indicated but AHP not suspected* would

benefit from AHP testing as they displayed suspicion of AHP or symptom complexes associated with AHP but have yet received a full diagnostic work-up.

Figure 1 shows a flowchart of the overall patient record filtering and manual review process. The process starts with 204,413 patient records, and using a combination of machine learning and structured data filtering described above, identifies 200 patients that were manually reviewed. 100 of those patients were identified as not having any mention of porphyria in the medical record and potentially could benefit from AHP diagnostic testing. The other 100 of those patients did have mention of porphyria in their medical record, but no diagnostic code for porphyria. These records were reviewed to determine the reason for the mention of porphyria and evaluate whether these reasons were consistent with the goal of the machine learning to identify patients with symptoms and other clinical features consistent with a possible porphyria diagnosis.

Commented [AMC7]: Move to beginning of the results section

## Results

### *Final selected features and machine learning cross-validation*

Formatted: Font: Italic

Figure 1 shows a flowchart of the overall patient record filtering and manual review process. The process starts with 204,413 patient records, and using a combination of machine learning and structured data filtering described above, identifies 200 patients that were manually reviewed. 100 of those patients were identified as not having any mention of porphyria in the medical record and potentially could benefit from AHP diagnostic testing. The other 100 of those patients did have mention of porphyria in their medical record, but no diagnostic code for porphyria. These records were reviewed to determine the reason for the mention of porphyria and evaluate whether these reasons were consistent with the goal of the machine learning to identify patients with symptoms and other clinical features consistent with a possible porphyria diagnosis.

Commented [AMC8]: Move to beginning of the results section

Several hundred features made it through the statistical testing and occurrence frequency filter. From these several hundred features, the manual review process reduced the set to approximately 200 features. These features were then evaluated by using them in a machine learning model and scoring the model using 5 repetitions of 2-fold cross-validation. These experiments found that an SVM with the radial basis function (RBF) kernel scored best for the ranking metrics AUC and average precision. The other machine learning methods explored failed to perform as well as the RBF SVM. It was also determined that feature values were best encoded using log normalization, transforming feature occurrence counts into values between 0.0 and 1.0. Binary encoding, as well as linear normalization, failed to perform as well. We used the SVMLight implementation of the RBF kernel. Experimentation with cross-validation showed  $\gamma = 0.04$  to be optimal.

Formatted: Normal

After algorithm selection and tuning, the second round of feature screening removed a few features that the SVM model assigned non-zero weights which were thought to be directly connected to the pre-established diagnosis of AHP by the clinical expert. For example, based on case series evidence, clinical hematology AHP specialists sometimes use cimetidine to treat AHP symptoms, as it is known to block a portion of the heme synthesis pathway as a side effect {Cherem, 2005 #11660}. We found that cimetidine was a highly weighted feature in our initial models (due to its use by a specialist [TD] at OHSU based on case report data {Cherem, 2005 #11660}) that had to be removed as it is given in response to AHP rather than being predictive. This process resulted in 141 total features being included in the final model.

The 141 features included in the final model are shown in **Table S-1**. Final feature set cross-validation performance on the entire training set is shown in **Table 4**.

Commented [AMC9]: Move to results, not methods

*Application of machine learning to the full data set*

Formatted: Font: Italic

The final machine learning model with the 141 features was trained on the entire data set, and this model was then applied back to the entire data set in order to provide a margin distance score for every patient.

The patient prediction scores were then analyzed. In particular, the range of scores obtained for the 30 confirmed positive training cases were compared to the rest of the patients in the data set. About 22,000 patients in the general population had scores that overlapped with those of the 30 positive patients. While this was only 10% of the patient records, it was more than could be manually reviewed.

We reviewed the top scoring 100 cases manually from each of two subsets of the general population. Out of the 100 patient charts we reviewed with no mention of porphyria, four were identified as likely to *AHP diagnostic testing likely indicated*, all without mention of porphyria in their medical record or documentation of a urine PBG test. The first patient was a male with six years of unexplained intermittent abdominal pain with nausea, vomiting, and diarrhea. His other conditions included complex regional pain syndrome, peripheral neuropathy, cardiac arrhythmias, panic attacks, and depression. The next patient was a female whose abdominal pain was described as ‘a long standing symptom with extensive negative evaluation’. Also listed in her profile were neuralgias, hereditary small fiber neuropathy, movement disorder, fibromyalgia, migraines, palpitations, and somatization disorder. The third patient was a woman with multiple emergency department admissions for severe abdominal pain. She also had severe suicidality with a permanent tracheostomy due to a hanging attempt, borderline personality disorder, tachycardia, anxiety, saddle anesthesia, insomnia, and severe somatization disorder including a comment in her note advising not to admit the patient for only vague complaints. The fourth patient was a female with a history of abdominal pain comments in the notes describing that the etiology had not been identified for her complex symptomology which included headaches, abdominal pain, paresthesias and palpitations.

Formatted: Paragraph

Overall, about a quarter of the 100 patients in the group without mention of porphyria had symptom profiles that were consistent with undiagnosed AHP and AHP diagnostic testing would either be likely or possibly indicated (**Table 5**). In this group there was no sign or suspicion of AHP by the clinician in the record. This is a much higher concentration of possible AHP patients than would be expected by chance based on the known prevalence of AHP.

Alternate explanations for characteristic AHP symptom profiles were diverse in the patient group without any mention of porphyria (**Table 6**). Cancers seen in this group included breast, uterine, pancreatic, cervical, leukemia and adrenal carcinoma. Other common comorbidities and conditions seen in this group included: fibromyalgia, irritable bowel syndrome, chronic fatigue, obesity, hypertension, obstructive sleep apnea, and chronic obstructive pulmonary disease. In contrast, alternate symptom profiles in the group with mention of porphyria in the notes were dominated by liver pathologies, mostly hepatocellular carcinoma.

Patients in the group *without* mention of porphyria in the medical record generally had much longer and more complicated histories compared to the other group, with 86 out of 100 having encounters spread over four years or longer. The patients *with* porphyria mentioned in the clinical notes tended to have shorter, and less complex histories (only 39 out of 100 had over 4 years of encounters), more focused on a single medical issue or set of symptoms, which may have been due to their being referral to our academic medical center from other health care sites.

There were small differences in age summary statistics between the two groups (**Table 7**), but notably more pediatric patients in the reviewed group with mention of porphyria found in clinical notes than those without (10 patients vs 1 patient). There were significantly more male patients found in this group too, compared to the group with no mention of porphyria (**Table 8**). Associated conditions for these 44 male patients were dominated by only a few diagnoses/symptom patterns: liver disease (N=18), suspicion of porphyria (N=11), or actinic keratosis (N=3). In contrast, no single condition dominated the male disease distribution in the patient group without mention of porphyria in the notes.

About a third of patients in the group *with* mention of porphyria in the clinical notes had some level of suspicion and work-up for AHP documented. We also identified four patients in this group that we thought had possibly undiagnosed AHP, without suspicion documented in the notes. We labeled these patients as *Diagnostic testing likely indicated but AHP not suspected*. Three of these patients had 'porphyria' in their clinical note listed as a standard precaution for several different medications (hydrochloroquinone, ferrous sulfate), which they were taking. In fact, about two thirds of the patients with 'porphyria' in the clinic notes had other reasons, besides suspicion of AHP, for the presence of this word (**Table 9**). A large number of these patients were candidates for liver transplantation. Standard clinical documentation for evaluation for this procedure included a list of possible causes of liver failure, including protoporphyria. Porphyria was also mentioned as a precaution for certain medications or treatments given to some patients in this group, which included hydroxychloroquinone ferrous sulfate, therapeutic abortion, and UV light therapy for actinic keratosis.

## Discussion

This work identified four likely and 18 possible patients who had no mention of porphyria in their charts for whom AHP diagnostic testing could be indicated. In addition, four patients who had mention of porphyria in their charts not related to a diagnostic evaluation of the disease were also found likely to have AHP diagnostic testing indicated. This number of patients with indications for AHP diagnostic testing and possibly to-be confirmed diagnosis vastly exceeds that due to chance and surpassed our expectations. It will require clinical follow-up to determine whether these patients' symptoms are truly due to AHP or not, but the manual record review clearly demonstrates that our methodology has found patients for whom a spot urine porphobilinogen test is indicated.

Another benefit of identifying such patients is to inform local specialists of the presence of patients with rare diseases in which they have expertise. An institution-wide search for confirmed AHP patients through our targeted ICD-10-CM code search plus manual chart review identified 30 confirmed AHP patients. A majority of these patients were previously unknown to

the porphyria specialist (TD) at OHSU. Identifying rare disease patients through large-scale data review in this manner can help connect them with the appropriate specialist to ensure optimal care.

Our results strongly suggest that leveraging of EHR data coupled with machine learning can be an effective method of identifying patients who should receive a diagnostic biochemical test to screen for AHP. Our automated model was able to identify patients with compelling constellations of symptoms who had not been previously worked up for porphyria. It was also able to identify patients for whom porphyria had been considered without direct access to porphyria-related data elements such as hemin treatment, lab tests specific to AHP, or mention of AHP diagnosis in clinical notes.

This is especially interesting in the light that the overall cross-validation scores of the model on the data set using the known 30 AHP cases as the positive set and the rest of the data as negative training samples was not very high, with cross-validation yielding an average AUC = 0.775. This is certainly a low performance figure compared to other current machine learning tasks such as publication type identification [Cohen, 2015 #9258], or facial image recognition [Sun, 2015 #11641]. However, these other tasks are very different from this one due to the extremely rare nature of the positive AHP cases in both the training data as well as in the actual patient population. In most machine learning research, a data set is considered skewed or imbalanced if the number of positive cases is much less than 50%. A recent systematic review on imbalanced data classification cites articles investigating negative to positive case ratios of 100 to 1 as “highly imbalanced” [Kaur, 2019 #11902;Dhar, 2014 #11903]. For problems such as rare diseases, the imbalance ratio can be nearly 10,000 to 1, as it is here. Lifting the predictive power to perhaps 22 in 100 manually reviewed cases is a potentially transformative level of performance.

The strongest positive predictors in the model included unexplained abdominal pain, pelvic and perineal pain, nausea and vomiting, and a number of pain and nausea medications. Frequent urinalysis was also a strong positive predictive feature, this is likely due to being associated with frequent ER visits and hospitalizations. The model relied on encoding the frequency of episodes, and not just binary presence of absence of symptoms. Indirectly, in the model this represented recurrent, undiagnosed problems consistent with AHP.

As these methods are general, and not specific to AHP, they should be applicable to other rare disorders that have a constellation of recurrent symptoms as indicating features. There are likely ways to improve the machine learning approach, including the use of more advanced features that represent time, duration, and intervals, explicit coding of symptom separation and overlap, and more sophisticated machine learning algorithms specifically tailored to situations where the positive case is extremely rare. Investigation into machine learning algorithms for highly skewed data such as these is an active area of research [Haixiang, 2017 #11642].

## Conclusion

The combination of large data sets, machine learning techniques, and clinical knowledge engineering can be a powerful tool to identify patients with undiagnosed rare diseases. The use

case of AHP presented here revealed four undiagnosed patients thought likely to have AHP, as well as 18 others who would likely benefit from testing. This level of precision in identifying potential cases of AHP from EHR data is much higher than would be expected by the prevalence of the disease.

Analyzing the EHR with advanced techniques such as demonstrated here points to the potential of the future of digital medicine on a population scale. Advanced approaches enabled by the wide deployment of the EHR can now be used to improve medicine and medical care in areas that have been underserved or inaccessible. Health care can be made more proactive, not simply in terms of common conditions and age or gender related screening, but for rarer conditions as well.

We plan to continue this work in several directions. First, an IRB-approved clinical validation study is being implemented. In this study, we will contact the primary care clinicians (PCP) of the patients where AHP diagnostic testing was found to be *likely* or *possibly* indicated. We will inform them that an algorithm based on EHR data has determined that their patient might have AHP and could benefit from a spot urine porphobilinogen, which is an inexpensive, non-invasive and easy to perform diagnostic test. With the agreement of the PCP, we will then contact patients and offer them the test. Expert clinical consultation will be made available to the PCP for any questions they have. We will collect data on the interactions with the PCPs, the number of spot urine porphobilinogen tests administered, as well as the test results. In this manner, we will be able to study the clinical impact of our rare disease identification approach.

Second, we will continue to refine our methods. Other machine learning algorithms, such as random forests and deep learning, may have advantages for AHP and other rare diseases. Other methods of encoding the EHR data that incorporate embeddings and temporal representations, have been shown to demonstrate leading-edge results in other fields, such as computer vision, machine translation, and speech recognition, and may assist with rare diseases.

Finally, we will extend this methodology to other rare diseases that are difficult to diagnose, focusing on those for which effective treatments are becoming available. If the timeline for diagnosing rare conditions can be substantially reduced, there is great potential to impact patient health in a very significant manner.

### Acknowledgements and Funding

This work was funded and the associated editorial support was provided by Alnylam Pharmaceuticals, Inc., Cambridge, MA.

### Declaration of Interest

Stephen Meninger, John J. Ko, and Jigar Amin, are employees of Alnylam, and Alex Wei was an employee of Alnylam during his contribution to the manuscript.





|                            |                                                                                           |
|----------------------------|-------------------------------------------------------------------------------------------|
| <b>Procedures Ordered</b>  | Procedures ordered by clinicians for patients during an encounter.                        |
| <b>Lab Result Comments</b> | Non-numerical, text portion, if any for results of lab tests.                             |
| <b>Surgeries</b>           | Description of surgeries performed on patient at hospital in both text and coded forms.   |
| <b>Vitals</b>              | Documentation of vital values such as heartrate, blood pressure, weight, and temperature. |

- Formatted: Font: 12 pt, Not Bold
- Formatted: Font: Not Bold
- Formatted: Font: 12 pt, Not Bold
- Formatted: Font: 12 pt, Not Bold
- Formatted: Font: Not Bold
- Formatted: Font: 12 pt, Not Bold
- Formatted: Font: 12 pt, Not Bold
- Formatted: Font: Not Bold
- Formatted: Font: Not Bold
- Formatted: Font: 12 pt, Not Bold
- Formatted: Font: 12 pt, Not Bold
- Formatted: Font: Not Bold
- Formatted: Font: 12 pt, Not Bold

**Table 2.** Electronic Health Record (EHR) total document and unique patients counts of porphyria codes and mentioned in text notes or label tests. Counts shown here are out of a total of 347,709,284 individual EHR documents and 204,413 total unique patient records.

| <u>Code</u>                                         | <u>Total Documents</u> | <u>Patients</u> |
|-----------------------------------------------------|------------------------|-----------------|
| ICD9 277.1                                          | 3879                   | 308             |
| E80.0 Hereditary erythropoietic porphyria           | 472                    | 37              |
| E80.1 Porphyria cutanea tarda                       | 783                    | 77              |
| E80.20 Unspecified porphyria                        | 2010                   | 247             |
| E80.21 Acute intermittent (hepatic) porphyria       | 1016                   | 47              |
| E80.29 Other porphyria                              | 109                    | 24              |
| E80.4 Gilbert syndrome                              | 3197                   | 366             |
| E80.6 Other disorders of bilirubin metabolism       | 9502                   | 2308            |
| E80.7 Disorder of bilirubin metabolism, unspecified | 75                     | 58              |
| Patients with porphyria mentioned in a lab test:    | 359                    | 175             |
| Searching field NOTE_TEXT for term porphyria:       | 14353                  | 3012            |

Formatted: Normal

Formatted: Font: (Default) Times New Roman

Formatted: Font: (Default) Times New Roman

Formatted: Font: (Default) Times New Roman

Formatted: Font: (Default) Calibri, Font color: Black

Formatted Table

Formatted: Font color: Text 1

**Table 3.** Summary of document types and counts used in the EHR data set for this research.

| <u>Document Type</u>            | <u>Patients</u> | <u>Encounters</u> | <u>Records</u>  | <u>Median</u> | <u>Max</u>   |
|---------------------------------|-----------------|-------------------|-----------------|---------------|--------------|
| <u>Current Medications</u>      | <u>187724</u>   | <u>N/A</u>        | <u>99602443</u> | <u>89</u>     | <u>57406</u> |
| <u>Demographics</u>             | <u>204413</u>   | <u>N/A</u>        | <u>204413</u>   | <u>1</u>      | <u>1</u>     |
| <u>Encounter Attributes</u>     | <u>204412</u>   | <u>19589057</u>   | <u>19589057</u> | <u>43</u>     | <u>3335</u>  |
| <u>Encounter Diagnoses</u>      | <u>202843</u>   | <u>10113657</u>   | <u>52295188</u> | <u>69</u>     | <u>27215</u> |
| <u>Hospital Encounters</u>      | <u>145551</u>   | <u>1163284</u>    | <u>1163284</u>  | <u>3</u>      | <u>520</u>   |
| <u>Lab Results</u>              | <u>172795</u>   | <u>2012185</u>    | <u>58386934</u> | <u>84</u>     | <u>27384</u> |
| <u>Ordered Medications</u>      | <u>190256</u>   | <u>3964120</u>    | <u>15155203</u> | <u>23</u>     | <u>7041</u>  |
| <u>Microbiology Results</u>     | <u>54798</u>    | <u>145528</u>     | <u>1988429</u>  | <u>5</u>      | <u>5174</u>  |
| <u>Notes</u>                    | <u>204161</u>   | <u>10014987</u>   | <u>28938900</u> | <u>56</u>     | <u>14933</u> |
| <u>Problem List</u>             | <u>181221</u>   | <u>N/A</u>        | <u>1737749</u>  | <u>6</u>      | <u>204</u>   |
| <u>Procedures Ordered</u>       | <u>198833</u>   | <u>5129756</u>    | <u>19501225</u> | <u>31</u>     | <u>35364</u> |
| <u>Result Comments</u>          | <u>131104</u>   | <u>896896</u>     | <u>1542279</u>  | <u>4</u>      | <u>1765</u>  |
| <u>Surgeries</u>                | <u>44238</u>    | <u>78403</u>      | <u>83535</u>    | <u>1</u>      | <u>54</u>    |
| <u>Vitals</u>                   | <u>199971</u>   | <u>3500418</u>    | <u>18268032</u> | <u>24</u>     | <u>9442</u>  |
| <u>Administered Medications</u> | <u>100565</u>   | <u>349332</u>     | <u>17160858</u> | <u>17</u>     | <u>53178</u> |
| <u>Ambulatory Encounters</u>    | <u>204235</u>   | <u>12091755</u>   | <u>12091755</u> | <u>27</u>     | <u>1991</u>  |

| <u>Type</u>                     | <u>Patients</u> | <u>Encounters</u> | <u>Records</u> | <u>Mean</u> | <u>Median</u> | <u>Max</u> |
|---------------------------------|-----------------|-------------------|----------------|-------------|---------------|------------|
| <u>current_medications</u>      | 187,724         | N/A               | 99,602,443     | 530.58      | 89            | 57,406     |
| <u>demographics</u>             | 204,413         | N/A               | 204,413        | 1.00        | 1             | 1          |
| <u>encounter_attributes</u>     | 204412          | 19,589,057        | 19,589,057     | 95.83       | 43            | 3335       |
| <u>encounter_diagnoses</u>      | 202,843         | 10,113,657        | 52,295,188     | 257.81      | 69            | 27,215     |
| <u>hospital_encounters</u>      | 145,551         | 1,163,284         | 1,163,284      | 7.99        | 3             | 520        |
| <u>lab_results</u>              | 172,795         | 2,012,185         | 58,386,934     | 337.90      | 84            | 27,384     |
| <u>medications_ordered</u>      | 190,256         | 3,964,120         | 15,155,203     | 79.66       | 23            | 7,041      |
| <u>microbiology_results</u>     | 54,798          | 145,528           | 1,988,429      | 36.29       | 5             | 5,174      |
| <u>notes</u>                    | 204,161         | 10,014,987        | 28,938,900     | 141.75      | 56            | 14,933     |
| <u>problem_list</u>             | 181,221         | N/A               | 1,737,749      | 9.59        | 6             | 204        |
| <u>procedures_ordered</u>       | 198,833         | 5,129,756         | 19,501,225     | 98.08       | 31            | 35,364     |
| <u>result_comments</u>          | 131,104         | 896,896           | 1,542,279      | 11.76       | 4             | 1,765      |
| <u>surgeries</u>                | 44,238          | 78,403            | 83,535         | 1.89        | 1             | 54         |
| <u>vitals</u>                   | 199,971         | 3,500,418         | 18,268,032     | 91.35       | 24            | 9,442      |
| <u>administered_medications</u> | 100,565         | 349,332           | 17,160,858     | 170.64      | 17            | 53,178     |
| <u>ambulatory_encounters</u>    | 204,235         | 12,091,755        | 12,091,755     | 59.21       | 27            | 1,991      |

Commented [AMC10]: Bill, What do you think of ...

Formatted ...

**Table 4.** Cross-validation performance of the final feature set on the entire data set for ranking the 30 confirmed cases of porphyria higher than the general population. SVM with radial basis function (RBF) kernel and gamma = 0.04.

| Metric            | Score |
|-------------------|-------|
| AUC               | 0.775 |
| Average Precision | 0.060 |
| Precision @ 100   | 0.031 |
| Log Loss          | 0.404 |

Formatted: Font: (Default) Times New Roman, Font color: Text 1

Formatted Table

Formatted: Font: (Default) Times New Roman

**Table 1** Assessment of the likelihood of undiagnosed acute hepatic porphyria based on clinical note symptom documentation. **Both groups** of 100 reviewed patients are listed.

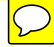

|                                                | <b>Acute Hepatic Porphyria?</b>                                       | <b># Patients</b> |
|------------------------------------------------|-----------------------------------------------------------------------|-------------------|
| <b>No mention of porphyria group (n=100)</b>   | Diagnostic test is <i>Likely Indicated</i>                            | 4                 |
|                                                | Diagnostic test is <i>Possibly Indicated</i>                          | 18                |
|                                                | Diagnostic test is <i>Unlikely Indicated</i>                          | 68                |
|                                                | Deceased                                                              | 10                |
| <b>'Porph' in clinical notes group (n=100)</b> | Suspected in chart                                                    | 16                |
|                                                | Suspected, ruled out in chart                                         | 15                |
|                                                | Diagnostic test is <i>Possibly Indicated</i> , not suspected in chart | 4                 |
|                                                | Unlikely based on chart review                                        | 54                |
|                                                | Diagnosed, documented in chart                                        | 4                 |
|                                                | Unknown, unable to determine                                          | 1                 |
|                                                | Deceased                                                              | 6                 |

Formatted Table

**Table 6.** Top alternative explanations for AHP symptom profiles seen in both group patients. Conditions seen in no more than one patient are not listed.

|                                      | <b>Alternate AHP Symptom Explanation</b>   | <b># Patients</b> |
|--------------------------------------|--------------------------------------------|-------------------|
| <i>No mention of porphyria group</i> | Surgery                                    | 8                 |
|                                      | Inflammatory Bowel Disease                 | 6                 |
|                                      | Cancer                                     | 6                 |
|                                      | Cancer Chemotherapy                        | 5                 |
|                                      | Gallbladder Pathology                      | 4                 |
|                                      | Diabetes                                   | 3                 |
|                                      | Carnitine Palmitoyl Transferase Deficiency | 2                 |
|                                      | Renal                                      | 4                 |
|                                      | Poly Cystic Ovarian Syndrome               | 2                 |
|                                      | Appendicitis                               | 2                 |
|                                      | Mastocytosis                               | 2                 |
|                                      | <i>'Porph' in clinical notes group</i>     | Liver Pathology   |
| Chemotherapy/Drug Side Effects       |                                            | 3                 |
| Mastocytosis                         |                                            | 2                 |

Formatted Table

**Table 7.** Age statistics in years for the two patient groups.

|                                                                                               | <b>NO MENTION OF<br/>PORPHYRIA</b> | <b>'PORPH' IN<br/>CLINICAL NOTES</b> |
|-----------------------------------------------------------------------------------------------|------------------------------------|--------------------------------------|
| <b>MEDIAN</b>                                                                                 | 51                                 | 54                                   |
| <b>MEAN</b>  | 53                                 | 50                                   |
| <b>MIN</b>                                                                                    | 8                                  | 6                                    |
| <b>MAX</b>                                                                                    | 91                                 | 91                                   |

Formatted Table

**Table 8.** Sex distribution for the two patient groups.

|               | <b>NO<br/>MENTION<br/>OF<br/>PORPHYRIA</b> | <b>'POPRH'<br/>IN<br/>CLINICAL<br/>NOTES</b> |
|---------------|--------------------------------------------|----------------------------------------------|
| <b>MALE</b>   | 25                                         | 44                                           |
| <b>FEMALE</b> | 75                                         | 56                                           |

Formatted Table



**Table 9.** Top reasons for the presence of the word ‘porph’ found in the clinical note.

| <i>More Common Reasons for 'Porph' in Clinical Notes</i> | <b># Patients</b> |
|----------------------------------------------------------|-------------------|
| <i>Suspicion of Porphyria</i>                            | 31                |
| <i>Liver Transplant Documentation</i>                    | 30                |
| <i>Porphyria Mentioned in Treatment Precautions</i>      | 18                |
| <i>Porphyria Diagnosis Mentioned in Notes</i>            | 4                 |
| <i>Porphyria Lab Tests Listed for Screening</i>          | 3                 |
| <i>Physical Family History of Porphyria</i>              | 5                 |
| <i>Misspelling</i>                                       | 2                 |

Formatted Table

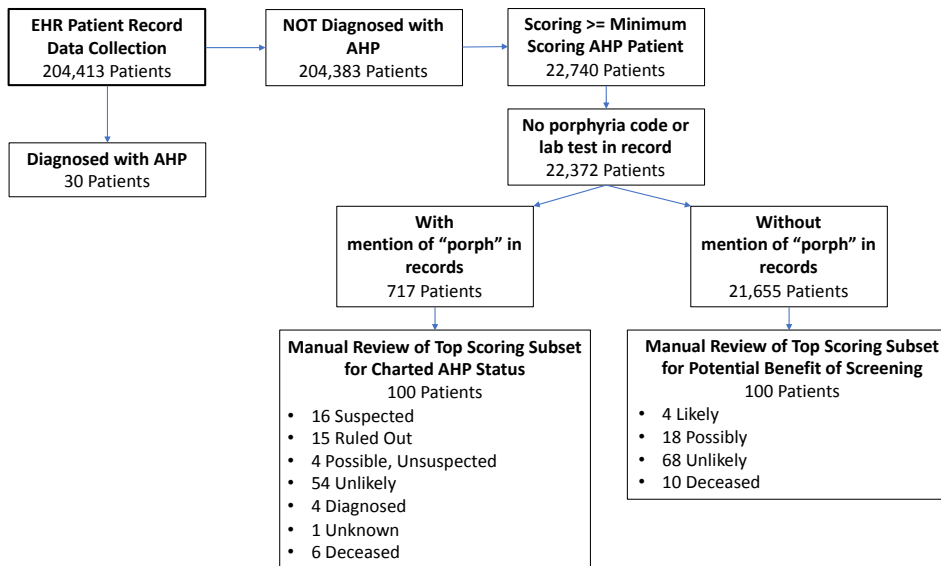

**Figure 1.** Flowchart of patient data record selection. Collection starts from full set of from full collection 204, 413 patient records and is filtered down to two sets of 100 records that were manually reviewed and characterized for 1) present indications for screening for AHP, and 2) status of AHP evaluation in the clinical notes of the record.

References

**Supplemental Table 1.** Final 1416 features selected for inclusion in the machine learning model to predict acute hepatic porphyria. Features are scored by number of occurrences in an individual patient medical record, and then normalized.

Commented [AMC12]: Need to reformat table to include data descriptions

| INDEX | FEATURE                                                                | SOURCE DOCUMENTS                                                                       | DE                          |
|-------|------------------------------------------------------------------------|----------------------------------------------------------------------------------------|-----------------------------|
| 1     | ABDOMINAL PAIN_DX_NAME                                                 | Encounter<br>Diagnosis,<br>Patient Problem<br>List                                     | Text<br>of d<br>cod         |
| 2     | ABDOMINAL PAIN UNSPECIFIED_SITE_DX_NAME                                | Encounter<br>Diagnosis,<br>Patient Problem<br>List                                     | Text<br>of d<br>cod         |
| 3     | ALTERNATIVE THERAPY -<br>PINEAL HORMONE_AGENTS_PHARM_SUBCLASS_NAME     | Concomittent<br>Medications,<br>Administered<br>Medications,<br>Medications<br>Ordered | Text description<br>of d    |
| 4     | ANALGESIC OPIOID OXYCODONE COMBINATIONS PHARM_SUBCLASS_NAME            | Concomittent<br>Medications,<br>Administered<br>Medications,<br>Medications<br>Ordered | Text description<br>of d    |
| 5     | ANTI-ANXIETY - BENZODIAZEPINES PHARM_CLASS_NAME                        | Concomittent<br>Medications,<br>Administered<br>Medications,<br>Medications<br>Ordered | Text description<br>of d    |
| 6     | ANTICONVULSANT - GABA ANALOGS PHARM_SUBCLASS_NAME                      | Concomittent<br>Medications,<br>Administered<br>Medications,<br>Medications<br>Ordered | Text description<br>of d    |
| 7     | ANTIEMETIC - PHENOTHIAZINES PHARM_SUBCLASS_NAME                        | Concomittent<br>Medications,<br>Administered<br>Medications,<br>Medications<br>Ordered | Text description<br>of d    |
| 8     | ANTIHISTAMINE - 1ST GENERATION -<br>ETHANOLAMINES PHARM_SUBCLASS_NAME  | Concomittent<br>Medications,<br>Administered<br>Medications,<br>Medications<br>Ordered | Text description<br>of d    |
| 9     | ANTIHISTAMINE - 1ST GENERATION -<br>PHENOTHIAZINES PHARM_SUBCLASS_NAME | Concomittent<br>Medications,<br>Administered<br>Medications,<br>Medications<br>Ordered | Text description<br>of d    |
| 10    | BASO # COMPONENT_NAME                                                  | Lab Results                                                                            | Percent<br>Basophils<br>per |

Formatted: Font: (Default) Times New Roman, 9 pt

Formatted: Font: Bold

Formatted: Font: (Default) Times New Roman, 9 pt

Formatted Table

Formatted: Font: (Default) Times New Roman, 9 pt

|    |                                                            |                                                                         |                                   |                                                  |
|----|------------------------------------------------------------|-------------------------------------------------------------------------|-----------------------------------|--------------------------------------------------|
| 11 | CALCIUM REPLACEMENT PHARM CLASS NAME                       | Concomittent Medications, Administered Medications, Medications Ordered | Text description of CBC with diff | Formatted: Font: (Default) Times New Roman, 9 pt |
| 12 | CBC WITH DIFFERENTIAL PROC NAME                            | Procedures Ordered                                                      | Code for consult to Gas           | Formatted: Font: (Default) Times New Roman, 9 pt |
| 13 | CNSLT0031 PROC CODE                                        | Procedures Ordered                                                      | Consult to Gastroenterology       | Formatted: Font: (Default) Times New Roman, 9 pt |
| 14 | CONSULT TO GASTROENTEROLOGY PROC NAME                      | Procedures Ordered                                                      | Text description of diagnosis     | Formatted: Font: (Default) Times New Roman, 9 pt |
| 15 | COPD (CHRONIC OBSTRUCTIVE PULMONARY DISEASE) (HCC) DX NAME | Encounter Diagnosis, Patient Problem List                               | lab result component              | Formatted: Font: (Default) Times New Roman, 9 pt |
| 16 | CREATININE URINE CONCENTRATION COMPONENT NAME              | Lab Results                                                             | lab result component              | Formatted: Font: (Default) Times New Roman, 9 pt |
| 17 | CREATININEUR(REFERRAL) COMPONENT NAME                      | Lab Results                                                             | blood differential order          | Formatted: Font: (Default) Times New Roman, 9 pt |
| 18 | DIFFERENTIAL PROC NAME                                     | Procedures Ordered                                                      | Generic name of med               | Formatted: Font: (Default) Times New Roman, 9 pt |
| 19 | DIPHENHYDRAMINE HCL GENERIC NAME 1                         | Concomittent Medication, Medications Ordered                            | Text description of diagnosis     | Formatted: Font: (Default) Times New Roman, 9 pt |
| 20 | ELEVATED WHITE BLOOD CELL COUNT UNSPECIFIED DX ICD10 NAME  | Encounter Diagnosis, Patient Problem List                               | eosinophili count                 | Formatted: Font: (Default) Times New Roman, 9 pt |
| 21 | EOS # COMPONENT NAME                                       | Lab Results                                                             | lab                               | Formatted: Font: (Default) Times New Roman, 9 pt |
| 22 | ESSENTIAL (PRIMARY) HYPERTENSION DX ICD10 NAME             | Encounter Diagnosis, Patient Problem List                               | Text description of diagnosis     | Formatted: Font: (Default) Times New Roman, 9 pt |
| 23 | FERRITIN SERUM PROC NAME                                   | Procedures Ordered                                                      | serum ferritin                    | Formatted: Font: (Default) Times New Roman, 9 pt |
| 24 | HYDROMORPHONE HCL GENERIC NAME 1                           | Concomittent Medication, Medications Ordered                            | Generic name of med               | Formatted: Font: (Default) Times New Roman, 9 pt |
| 25 | LAB00047 PROC CODE                                         | Procedures Ordered                                                      | Plasma nptase procedure           | Formatted: Font: (Default) Times New Roman, 9 pt |
| 26 | LAB00364 PROC CODE                                         | Procedures Ordered                                                      | Microscopic urine exam            | Formatted: Font: (Default) Times New Roman, 9 pt |
| 27 | LAB00681 PROC CODE                                         | Procedures Ordered                                                      | CBC with differential             | Formatted: Font: (Default) Times New Roman, 9 pt |

|    |                                                                                               |                                                                                        |                                                       |                                                  |
|----|-----------------------------------------------------------------------------------------------|----------------------------------------------------------------------------------------|-------------------------------------------------------|--------------------------------------------------|
| 28 | LAB100107_PROC_CODE                                                                           | Procedures<br>Ordered                                                                  | Blood<br>differential<br>ord                          | Formatted: Font: (Default) Times New Roman, 9 pt |
| 29 | LAB100227_PROC_CODE                                                                           | Procedures<br>Ordered                                                                  | Urine volume<br>measurement<br>ord                    | Formatted: Font: (Default) Times New Roman, 9 pt |
| 30 | LAB100882_PROC_CODE                                                                           | Procedures<br>Ordered                                                                  | Multi-tube blood<br>draw                              | Formatted: Font: (Default) Times New Roman, 9 pt |
| 31 | LIPASE_(LAB)_COMPONENT_NAME                                                                   | Lab Results                                                                            | plasma lipase<br>result component<br>pres             | Formatted: Font: (Default) Times New Roman, 9 pt |
| 32 | LIPASE_PLASMA_PROC_NAME                                                                       | Procedures<br>Ordered                                                                  | plasma lipase<br>ord                                  | Formatted: Font: (Default) Times New Roman, 9 pt |
| 33 | LYMPHOCYTE_#_COMPONENT_NAME                                                                   | Lab Results                                                                            | blood<br>lymphocyte<br>count results<br>pres          | Formatted: Font: (Default) Times New Roman, 9 pt |
| 34 | MAGNESIUM_SALTS_REPLACEMENT_PHARM_CLASS_NAME                                                  | Concomitant<br>Medications,<br>Administered<br>Medications,<br>Medications,<br>Ordered | Text description<br>of d                              | Formatted: Font: (Default) Times New Roman, 9 pt |
| 35 | MELATONIN_GENERIC_NAME_1                                                                      | Concomitant<br>Medication,<br>Medications,<br>Ordered                                  | Generic name of<br>med                                | Formatted: Font: (Default) Times New Roman, 9 pt |
| 36 | MINERALS_AND_ELECTROLYTES_-<br>CALCIUM_REPLACEMENT/VITAMIN_D_COMBINATIONS_PHARM_SUBCLASS_NAME | Concomitant<br>Medications,<br>Administered<br>Medications,<br>Medications,<br>Ordered | Text description<br>of d                              | Formatted: Font: (Default) Times New Roman, 9 pt |
| 37 | MISC_REF_TEST_NAME_COMPONENT_NAME                                                             | Lab Results                                                                            | Spectral test<br>given with name<br>of test in<br>RES | Formatted: Font: (Default) Times New Roman, 9 pt |
| 38 | MISC_REF_TEST_RESULT_COMPONENT_NAME                                                           | Lab Results                                                                            | Result or special<br>test                             | Formatted: Font: (Default) Times New Roman, 9 pt |
| 39 | MONOCYTE_#_COMPONENT_NAME                                                                     | Lab Results                                                                            | blood monocyte<br>count results<br>pres               | Formatted: Font: (Default) Times New Roman, 9 pt |
| 40 | NAUSEA_WITH_VOMITING_UNSPECIFIED_DX_ICD10_NAME                                                | Encounter<br>Diagnosis,<br>Patient Problem<br>List                                     | Text description<br>of diagnosis<br>cod               | Formatted: Font: (Default) Times New Roman, 9 pt |
| 41 | NEUTROPHIL_#_COMPONENT_NAME                                                                   | Lab Results                                                                            | blood neutrophil<br>count results<br>pres             | Formatted: Font: (Default) Times New Roman, 9 pt |
| 42 | NGRAM_0^pramipexole                                                                           | Notes                                                                                  | Bigram or<br>[token]^[token]<br>found in free<br>text | Formatted: Font: (Default) Times New Roman, 9 pt |
| 43 | NGRAM_0^tablet                                                                                | Notes                                                                                  | Bigram or<br>[token]^[token]<br>found in free<br>text | Formatted: Font: (Default) Times New Roman, 9 pt |
| 44 | NGRAM_10^olanzapine                                                                           | Notes                                                                                  | Bigram or<br>[tok                                     | Formatted: Font: (Default) Times New Roman, 9 pt |

|    |                                       |       |                                                                                               |
|----|---------------------------------------|-------|-----------------------------------------------------------------------------------------------|
|    |                                       |       | found in free text.                                                                           |
| 45 | <u>.NGRAM_10^tablet</u>               | Notes | Bigram of [token]^[token] found in free text Formatted: Font: (Default) Times New Roman, 9 pt |
| 46 | <u>.NGRAM_100^sodium</u>              | Notes | Bigram or [token]^[token] found in free text Formatted: Font: (Default) Times New Roman, 9 pt |
| 47 | <u>.NGRAM_4^mg</u>                    | Notes | Bigram or [token]^[token] found in free text Formatted: Font: (Default) Times New Roman, 9 pt |
| 48 | <u>.NGRAM_4^odt</u>                   | Notes | Bigram or [token]^[token] found in free text Formatted: Font: (Default) Times New Roman, 9 pt |
| 49 | <u>.NGRAM_90^albuterol</u>            | Notes | Bigram or [token]^[token] found in free text Formatted: Font: (Default) Times New Roman, 9 pt |
| 50 | <u>.NGRAM_abdominal</u>               | Notes | Unigram or [token] found in free text Formatted: Font: (Default) Times New Roman, 9 pt        |
| 51 | <u>.NGRAM_abdominal^pain</u>          | Notes | Bigram or [token]^[token] found in free text Formatted: Font: (Default) Times New Roman, 9 pt |
| 52 | <u>.NGRAM_acute</u>                   | Notes | Unigram or [token] found in free text Formatted: Font: (Default) Times New Roman, 9 pt        |
| 53 | <u>.NGRAM_acute^distress</u>          | Notes | Bigram or [token]^[token] found in free text Formatted: Font: (Default) Times New Roman, 9 pt |
| 54 | <u>.NGRAM_ambulatory</u>              | Notes | Unigram or [token] found in free text Formatted: Font: (Default) Times New Roman, 9 pt        |
| 55 | <u>.NGRAM_antibiotics</u>             | Notes | Unigram or [token] found in free text Formatted: Font: (Default) Times New Roman, 9 pt        |
| 56 | <u>.NGRAM_antibiotics^sulfonamide</u> | Notes | Bigram or [token]^[token] found in free text Formatted: Font: (Default) Times New Roman, 9 pt |
| 57 | <u>.NGRAM_atraumatic</u>              | Notes | Unigram or [token] found in free text Formatted: Font: (Default) Times New Roman, 9 pt        |
| 58 | <u>.NGRAM_bipolar</u>                 | Notes | Unigram or [token] found in free text Formatted: Font: (Default) Times New Roman, 9 pt        |
| 59 | <u>.NGRAM_cigarettes</u>              | Notes | Unigram or [token] found in free text Formatted: Font: (Default) Times New Roman, 9 pt        |
| 60 | <u>.NGRAM_compazine</u>               | Notes | Unigram or [token] found in free text Formatted: Font: (Default) Times New Roman, 9 pt        |
| 61 | <u>.NGRAM_control^pain</u>            | Notes | Bigram or [tok Formatted: Font: (Default) Times New Roman, 9 pt                               |

|                    |                                            |                       |                                                                                                |
|--------------------|--------------------------------------------|-----------------------|------------------------------------------------------------------------------------------------|
|                    |                                            |                       | found in free text.                                                                            |
| <a href="#">62</a> | <a href="#">_NGRAM_depakote</a>            | <a href="#">Notes</a> | Unigram of [token] found in free text. Formatted: Font: (Default) Times New Roman, 9 pt        |
| <a href="#">63</a> | <a href="#">_NGRAM_dilaudid</a>            | <a href="#">Notes</a> | Unigram or [token] found in free text. Formatted: Font: (Default) Times New Roman, 9 pt        |
| <a href="#">64</a> | <a href="#">_NGRAM_discharged</a>          | <a href="#">Notes</a> | Unigram or [token] found in free text. Formatted: Font: (Default) Times New Roman, 9 pt        |
| <a href="#">65</a> | <a href="#">_NGRAM_disintegrating</a>      | <a href="#">Notes</a> | Unigram or [token] found in free text. Formatted: Font: (Default) Times New Roman, 9 pt        |
| <a href="#">66</a> | <a href="#">_NGRAM_docusate</a>            | <a href="#">Notes</a> | Unigram or [token] found in free text. Formatted: Font: (Default) Times New Roman, 9 pt        |
| <a href="#">67</a> | <a href="#">_NGRAM_docusate^sodium</a>     | <a href="#">Notes</a> | Bigram or [token]^[token] found in free text. Formatted: Font: (Default) Times New Roman, 9 pt |
| <a href="#">68</a> | <a href="#">_NGRAM_dose^oral</a>           | <a href="#">Notes</a> | Bigram or [token]^[token] found in free text. Formatted: Font: (Default) Times New Roman, 9 pt |
| <a href="#">69</a> | <a href="#">_NGRAM_duloxetine</a>          | <a href="#">Notes</a> | Unigram or [token] found in free text. Formatted: Font: (Default) Times New Roman, 9 pt        |
| <a href="#">70</a> | <a href="#">_NGRAM_ed</a>                  | <a href="#">Notes</a> | Unigram or [token] found in free text. Formatted: Font: (Default) Times New Roman, 9 pt        |
| <a href="#">71</a> | <a href="#">_NGRAM_edisylate]</a>          | <a href="#">Notes</a> | Unigram or [token] found in free text. Formatted: Font: (Default) Times New Roman, 9 pt        |
| <a href="#">72</a> | <a href="#">_NGRAM_extended^tablet</a>     | <a href="#">Notes</a> | Bigram or [token]^[token] found in free text. Formatted: Font: (Default) Times New Roman, 9 pt |
| <a href="#">73</a> | <a href="#">_NGRAM_fibromyalgia</a>        | <a href="#">Notes</a> | Unigram or [token] found in free text. Formatted: Font: (Default) Times New Roman, 9 pt        |
| <a href="#">74</a> | <a href="#">_NGRAM_flare</a>               | <a href="#">Notes</a> | Unigram or [token] found in free text. Formatted: Font: (Default) Times New Roman, 9 pt        |
| <a href="#">75</a> | <a href="#">_NGRAM_flares</a>              | <a href="#">Notes</a> | Unigram or [token] found in free text. Formatted: Font: (Default) Times New Roman, 9 pt        |
| <a href="#">76</a> | <a href="#">_NGRAM_focal</a>               | <a href="#">Notes</a> | Unigram or [token] found in free text. Formatted: Font: (Default) Times New Roman, 9 pt        |
| <a href="#">77</a> | <a href="#">_NGRAM_gallops</a>             | <a href="#">Notes</a> | Unigram or [token] found in free text. Formatted: Font: (Default) Times New Roman, 9 pt        |
| <a href="#">78</a> | <a href="#">_NGRAM_genitourinary</a>       | <a href="#">Notes</a> | Unigram or [token] found in free text. Formatted: Font: (Default) Times New Roman, 9 pt        |
| <a href="#">79</a> | <a href="#">_NGRAM_glycol</a>              | <a href="#">Notes</a> | Unigram or [token] found in free text. Formatted: Font: (Default) Times New Roman, 9 pt        |
| <a href="#">80</a> | <a href="#">_NGRAM_glycol^polyethylene</a> | <a href="#">Notes</a> | Bigram or [tok] Formatted: Font: (Default) Times New Roman, 9 pt                               |



|                    |                                        |       |                                                                                                 |
|--------------------|----------------------------------------|-------|-------------------------------------------------------------------------------------------------|
|                    |                                        |       | found in free text.                                                                             |
| <a href="#">81</a> | <a href="#">.NGRAM_gram</a>            | Notes | Unigram of [token] found in free text. Formatted: Font: (Default) Times New Roman, 9 pt         |
| <a href="#">82</a> | <a href="#">.NGRAM_hydromorphone</a>   | Notes | Unigram or [token] found in free text. Formatted: Font: (Default) Times New Roman, 9 pt         |
| <a href="#">83</a> | <a href="#">.NGRAM_instructed</a>      | Notes | Unigram or [token] found in free text. Formatted: Font: (Default) Times New Roman, 9 pt         |
| <a href="#">84</a> | <a href="#">.NGRAM_iv</a>              | Notes | Unigram or [token] found in free text. Formatted: Font: (Default) Times New Roman, 9 pt         |
| <a href="#">85</a> | <a href="#">.NGRAM_latex</a>           | Notes | Unigram or [token] found in free text. Formatted: Font: (Default) Times New Roman, 9 pt         |
| <a href="#">86</a> | <a href="#">.NGRAM_magnesium</a>       | Notes | Unigram or [token] found in free text. Formatted: Font: (Default) Times New Roman, 9 pt         |
| <a href="#">87</a> | <a href="#">.NGRAM_melatonin</a>       | Notes | Unigram or [token] found in free text. Formatted: Font: (Default) Times New Roman, 9 pt         |
| <a href="#">88</a> | <a href="#">.NGRAM_miralax</a>         | Notes | Unigram or [token] found in free text. Formatted: Font: (Default) Times New Roman, 9 pt         |
| <a href="#">89</a> | <a href="#">.NGRAM_mouth^needed</a>    | Notes | Bigram or [token]^ [token] found in free text. Formatted: Font: (Default) Times New Roman, 9 pt |
| <a href="#">90</a> | <a href="#">.NGRAM_mouth^twelve</a>    | Notes | Bigram or [token]^ [token] found in free text. Formatted: Font: (Default) Times New Roman, 9 pt |
| <a href="#">91</a> | <a href="#">.NGRAM_nausea</a>          | Notes | Unigram or [token] found in free text. Formatted: Font: (Default) Times New Roman, 9 pt         |
| <a href="#">92</a> | <a href="#">.NGRAM_nausea^vomiting</a> | Notes | Bigram or [token]^ [token] found in free text. Formatted: Font: (Default) Times New Roman, 9 pt |
| <a href="#">93</a> | <a href="#">.NGRAM_odt</a>             | Notes | Unigram or [token] found in free text. Formatted: Font: (Default) Times New Roman, 9 pt         |
| <a href="#">94</a> | <a href="#">.NGRAM_odt^ondansetron</a> | Notes | Bigram or [token]^ [token] found in free text. Formatted: Font: (Default) Times New Roman, 9 pt |
| <a href="#">95</a> | <a href="#">.NGRAM_olanzapine</a>      | Notes | Unigram or [token] found in free text. Formatted: Font: (Default) Times New Roman, 9 pt         |
| <a href="#">96</a> | <a href="#">.NGRAM_oncology</a>        | Notes | Unigram or [token] found in free text. Formatted: Font: (Default) Times New Roman, 9 pt         |
| <a href="#">97</a> | <a href="#">.NGRAM_ondansetron</a>     | Notes | Unigram or [token] found in free text. Formatted: Font: (Default) Times New Roman, 9 pt         |
| <a href="#">98</a> | <a href="#">.NGRAM_oral^powder</a>     | Notes | Bigram or [token]^ [token] found in free text. Formatted: Font: (Default) Times New Roman, 9 pt |

|                     |                                     |                       |                                               |                                                  |
|---------------------|-------------------------------------|-----------------------|-----------------------------------------------|--------------------------------------------------|
| <a href="#">99</a>  | <a href="#">_NGRAM_oxycodone</a>    | <a href="#">Notes</a> | Unigram of<br>[token] found in<br>free        | Formatted: Font: (Default) Times New Roman, 9 pt |
| <a href="#">100</a> | <a href="#">_NGRAM_pain^severe</a>  | <a href="#">Notes</a> | Bigram or<br>[token]^[token]<br>found in free | Formatted: Font: (Default) Times New Roman, 9 pt |
| <a href="#">101</a> | <a href="#">_NGRAM_pathology</a>    | <a href="#">Notes</a> | Unigram or<br>[token] found in<br>free        | Formatted: Font: (Default) Times New Roman, 9 pt |
| <a href="#">102</a> | <a href="#">_NGRAM_penicillins</a>  | <a href="#">Notes</a> | Unigram or<br>[token] found in<br>free        | Formatted: Font: (Default) Times New Roman, 9 pt |
| <a href="#">103</a> | <a href="#">_NGRAM_phenergan</a>    | <a href="#">Notes</a> | Unigram or<br>[token] found in<br>free        | Formatted: Font: (Default) Times New Roman, 9 pt |
| <a href="#">104</a> | <a href="#">_NGRAM_polyethylene</a> | <a href="#">Notes</a> | Unigram or<br>[token] found in<br>free        | Formatted: Font: (Default) Times New Roman, 9 pt |
| <a href="#">105</a> | <a href="#">_NGRAM_powder</a>       | <a href="#">Notes</a> | Unigram or<br>[token] found in<br>free        | Formatted: Font: (Default) Times New Roman, 9 pt |
| <a href="#">106</a> | <a href="#">_NGRAM_pramipexole</a>  | <a href="#">Notes</a> | Unigram or<br>[token] found in<br>free        | Formatted: Font: (Default) Times New Roman, 9 pt |
| <a href="#">107</a> | <a href="#">_NGRAM_propranolol</a>  | <a href="#">Notes</a> | Unigram or<br>[token] found in<br>free        | Formatted: Font: (Default) Times New Roman, 9 pt |
| <a href="#">108</a> | <a href="#">_NGRAM_protocol</a>     | <a href="#">Notes</a> | Unigram or<br>[token] found in<br>free        | Formatted: Font: (Default) Times New Roman, 9 pt |
| <a href="#">109</a> | <a href="#">_NGRAM_psychosis</a>    | <a href="#">Notes</a> | Unigram or<br>[token] found in<br>free        | Formatted: Font: (Default) Times New Roman, 9 pt |
| <a href="#">110</a> | <a href="#">_NGRAM_risperidone</a>  | <a href="#">Notes</a> | Unigram or<br>[token] found in<br>free        | Formatted: Font: (Default) Times New Roman, 9 pt |
| <a href="#">111</a> | <a href="#">_NGRAM_rubs</a>         | <a href="#">Notes</a> | Unigram or<br>[token] found in<br>free        | Formatted: Font: (Default) Times New Roman, 9 pt |
| <a href="#">112</a> | <a href="#">_NGRAM_scoliosis</a>    | <a href="#">Notes</a> | Unigram or<br>[token] found in<br>free        | Formatted: Font: (Default) Times New Roman, 9 pt |
| <a href="#">113</a> | <a href="#">_NGRAM_serquel</a>      | <a href="#">Notes</a> | Unigram or<br>[token] found in<br>free        | Formatted: Font: (Default) Times New Roman, 9 pt |
| <a href="#">114</a> | <a href="#">_NGRAM_severe</a>       | <a href="#">Notes</a> | Unigram or<br>[token] found in<br>free        | Formatted: Font: (Default) Times New Roman, 9 pt |
| <a href="#">115</a> | <a href="#">_NGRAM_stomach</a>      | <a href="#">Notes</a> | Unigram or<br>[token] found in<br>free        | Formatted: Font: (Default) Times New Roman, 9 pt |
| <a href="#">116</a> | <a href="#">_NGRAM_sulfa</a>        | <a href="#">Notes</a> | Unigram or<br>[token] found in<br>free        | Formatted: Font: (Default) Times New Roman, 9 pt |
| <a href="#">117</a> | <a href="#">_NGRAM_sulfonamide</a>  | <a href="#">Notes</a> | Unigram or<br>[token] found in<br>free        | Formatted: Font: (Default) Times New Roman, 9 pt |
| <a href="#">118</a> | <a href="#">_NGRAM_urine</a>        | <a href="#">Notes</a> | Unigram or<br>[token] found in<br>free        | Formatted: Font: (Default) Times New Roman, 9 pt |

|     |                                                                |                                                                         |                                                     |                                                  |
|-----|----------------------------------------------------------------|-------------------------------------------------------------------------|-----------------------------------------------------|--------------------------------------------------|
| 119 | <u>NGRAM_vicodin</u>                                           | Notes                                                                   | Unigram of [token] found in<br><u>free</u>          | Formatted: Font: (Default) Times New Roman, 9 pt |
| 120 | <u>NGRAM_zofran</u>                                            | Notes                                                                   | Unigram of [token] found in<br><u>free</u>          | Formatted: Font: (Default) Times New Roman, 9 pt |
| 121 | <u>NORMAL_RANGE_COMPONENT_NAME</u>                             | Lab Results                                                             | Lab test result within normal range<br><u>range</u> | Formatted: Font: (Default) Times New Roman, 9 pt |
| 122 | <u>OBSTRUCTIVE_SLEEP_APNEA_(ADULT)_PEDIATRIC_DX_ICD10_NAME</u> | Encounter<br>Diagnosis,<br>Patient Problem<br>List                      | Text description of diagnosis<br><u>code</u>        | Formatted: Font: (Default) Times New Roman, 9 pt |
| 123 | <u>OBSTRUCTIVE_SLEEP_APNEA_DX_NAME</u>                         | Encounter<br>Diagnosis,<br>Patient Problem<br>List                      | Text description of diagnosis<br><u>code</u>        | Formatted: Font: (Default) Times New Roman, 9 pt |
| 124 | <u>ONDANSETRON_HCL_GENERIC_NAME_1</u>                          | Concomittent Medication, Medications Ordered                            | Generic name of<br><u>med</u>                       | Formatted: Font: (Default) Times New Roman, 9 pt |
| 125 | <u>OXYCODONE_HCL/ACETAMINOPHEN_GENERIC_NAME_1</u>              | Concomittent Medication, Medications Ordered                            | Generic name of<br><u>med</u>                       | Formatted: Font: (Default) Times New Roman, 9 pt |
| 126 | <u>PATHOLOGY_PROC_NAME</u>                                     | Procedures Ordered                                                      | Transcribed pathology report<br><u>pres</u>         | Formatted: Font: (Default) Times New Roman, 9 pt |
| 127 | <u>PELVIC_AND_PERINEAL_PAIN_DX_ICD10_NAME</u>                  | Encounter<br>Diagnosis,<br>Patient Problem<br>List                      | Text description of diagnosis<br><u>code</u>        | Formatted: Font: (Default) Times New Roman, 9 pt |
| 128 | <u>PINEAL_HORMONE_AGENTS_PHARM_CLASS_NAME</u>                  | Concomittent Medications, Administered Medications, Medications Ordered | Text description of d<br><u>code</u>                | Formatted: Font: (Default) Times New Roman, 9 pt |
| 129 | <u>PROCHLORPERAZINE_EDISYLATE_GENERIC_NAME_1</u>               | Concomittent Medication, Medications Ordered                            | Generic name of<br><u>med</u>                       | Formatted: Font: (Default) Times New Roman, 9 pt |
| 130 | <u>PROMETHAZINE_HCL_GENERIC_NAME_1</u>                         | Concomittent Medication, Medications Ordered                            | Generic name of<br><u>med</u>                       | Formatted: Font: (Default) Times New Roman, 9 pt |
| 131 | <u>RADIOLOGY_PROC_NAME</u>                                     | Procedures Ordered                                                      | Transcribed radiology report<br><u>pres</u>         | Formatted: Font: (Default) Times New Roman, 9 pt |
| 132 | <u>RAINBOW_HOLD_TUBE_-BLUE_TOP_PROC_NAME</u>                   | Procedures Ordered                                                      | Multi-tube brood<br><u>draw</u>                     | Formatted: Font: (Default) Times New Roman, 9 pt |
| 133 | <u>RESTLESS_LEGS_SYNDROME_DX_ICD10_NAME</u>                    | Encounter<br>Diagnosis,<br>Patient Problem<br>List                      | Text description of diagnosis<br><u>code</u>        | Formatted: Font: (Default) Times New Roman, 9 pt |
| 134 | <u>TOBACCO_ABUSE_DX_NAME</u>                                   | Encounter<br>Diagnosis,<br>Patient Problem<br>List                      | Text description of diagnosis<br><u>code</u>        | Formatted: Font: (Default) Times New Roman, 9 pt |

|     |                                          |                                                    |                                         |                                                  |
|-----|------------------------------------------|----------------------------------------------------|-----------------------------------------|--------------------------------------------------|
| 135 | TRIPLE_P04_CRYSTALS_COMPONENT_NAME       | Lab Results                                        | Component of<br>resu                    | Formatted: Font: (Default) Times New Roman, 9 pt |
| 136 | TRNS00039_PROC_CODE                      | Procedures<br>Ordered                              | Transcribed<br>pathology report<br>pres | Formatted: Font: (Default) Times New Roman, 9 pt |
| 137 | TRNS00040_PROC_CODE                      | Procedures<br>Ordered                              | Transcribed<br>imaging report<br>pres   | Formatted: Font: (Default) Times New Roman, 9 pt |
| 138 | UNSPECIFIED ABDOMINAL PAIN DX ICD10_NAME | Encounter<br>Diagnosis,<br>Patient Problem<br>List | Text description<br>of diagnosis<br>cod | Formatted: Font: (Default) Times New Roman, 9 pt |
| 139 | UNSPECIFIED ABDOMINAL PAIN DX ICD10_NAME | Encounter<br>Diagnosis,<br>Patient Problem<br>List | Text description<br>of diagnosis<br>cod | Formatted: Font: (Default) Times New Roman, 9 pt |
| 140 | URINE MICROSCOPIC EXAM PROC_NAME         | Lab Results                                        | Name of lab test<br>pro                 | Formatted: Font: (Default) Times New Roman, 9 pt |
| 141 | VOL(URINE)_PROC_NAME                     | Lab Results                                        | Name of lab test<br>pro                 | Formatted: Font: (Default) Times New Roman, 9 pt |

1. ~~PELVIC AND PERINEAL PAIN DX ICD10\_NAME~~
2. ~~MAGNESIUM SALTS REPLACEMENT PHARM CLASS NAME~~
3. ~~NGRAM\_atraumatic~~
4. ~~NGRAM\_pain^severe~~
5. ~~NAUSEA WITH VOMITING UNSPECIFIED DX ICD10\_NAME~~
6. ~~CALCIUM REPLACEMENT PHARM CLASS NAME~~
7. ~~MINERALS AND ELECTROLYTES\_  
\_CALCIUM REPLACEMENT/VITAMIN D COMBINATIONS PHARM SUBC  
LASS NAME~~
8. ~~NGRAM\_compazine~~
9. ~~DIFFERENTIAL\_PROC\_NAME~~
10. ~~LAB100107\_PROC\_CODE~~
11. ~~COPD (CHRONIC OBSTRUCTIVE PULMONARY DISEASE) (HCC) DX NA  
ME~~
12. ~~ELEVATED WHITE BLOOD CELL COUNT UNSPECIFIED DX ICD10 NA  
ME~~
13. ~~OBSTRUCTIVE SLEEP APNEA (ADULT) (PEDIATRIC) DX ICD10\_NAME~~
14. ~~NGRAM\_oxycodone~~
15. ~~NGRAM\_dose^oral~~
16. ~~PROCHLORPERAZINE EDISYLATE GENERIC NAME\_1~~
17. ~~NGRAM\_protocol~~
18. ~~NGRAM\_scoliosis~~
19. ~~NGRAM\_duloxetine~~
20. ~~ANTIEMETIC\_ PHENOTHIAZINES PHARM SUBCLASS NAME~~
21. ~~NGRAM\_seroquel~~
22. ~~TOBACCO ABUSE DX NAME~~
23. ~~HYDROMORPHONE HCL GENERIC NAME\_1~~
24. ~~OBSTRUCTIVE SLEEP APNEA DX NAME~~
25. ~~NGRAM\_oncology~~
26. ~~LAB100882\_PROC\_CODE~~

27. ~~RAINBOW\_HOLD\_TUBE\_ \_BLUE\_TOP\_PROC\_NAME~~  
28. ~~NGRAM\_mouth^twelve~~  
29. ~~DIPHENHYDRAMINE\_HCL\_GENERIC\_NAME\_1~~  
30. ~~NGRAM\_extended^tablet~~  
31. ~~ANTIHISTAMINE\_ \_1ST\_GENERATION\_ \_  
\_ETHANOLAMINES\_PHARM\_SUBCLASS\_NAME~~  
32. ~~NGRAM\_cigarettes~~  
33. ~~UNSPECIFIED\_ABDOMINAL\_PAIN\_DX\_ICD10\_NAME~~  
34. ~~NGRAM\_fibromyalgia~~  
35. ~~NGRAM\_bipolar~~  
36. ~~# REMOVED NGRAM\_hematology~~  
37. ~~LAB00364\_PROC\_CODE~~  
38. ~~URINE\_MICROSCOPIC\_EXAM\_PROC\_NAME~~  
39. ~~NGRAM\_edisylate}~~  
40. ~~ANTI ANXIETY\_ \_BENZODIAZEPINES\_PHARM\_CLASS\_NAME~~  
41. ~~ALTERNATIVE\_THERAPY\_ \_  
\_PINEAL\_HORMONE\_AGENTS\_PHARM\_SUBCLASS\_NAME~~  
42. ~~NGRAM\_4^mg~~  
43. ~~ONDANSETRON\_HCL\_GENERIC\_NAME\_1~~  
44. ~~TRNS00039\_PROC\_CODE~~  
45. ~~PATHOLOGY\_PROC\_NAME~~  
46. ~~UNSPECIFIED\_ABDOMINAL\_PAIN\_DX\_ICD10\_NAME~~  
47. ~~RESTLESS\_LEGS\_SYNDROME\_DX\_ICD10\_NAME~~  
48. ~~TRNS00040\_PROC\_CODE~~  
49. ~~RADIOLOGY\_PROC\_NAME~~  
50. ~~NGRAM\_miralax~~  
51. ~~CONSULT\_TO\_GASTROENTEROLOGY\_PROC\_NAME~~  
52. ~~CNSLT0031\_PROC\_CODE~~  
53. ~~NGRAM\_ondansetron~~  
54. ~~ABDOMINAL\_PAIN\_DX\_NAME~~  
55. ~~MELATONIN\_GENERIC\_NAME\_1~~  
56. ~~PINEAL\_HORMONE\_AGENTS\_PHARM\_CLASS\_NAME~~  
57. ~~TRIPLE\_P04\_CRYSTALS\_COMPONENT\_NAME~~  
58. ~~NGRAM\_dilaudid~~  
59. ~~NGRAM\_focal~~  
60. ~~NGRAM\_nausea^vomiting~~  
61. ~~NGRAM\_10^olanzapine~~  
62. ~~NGRAM\_antibiotics~~  
63. ~~LAB00047\_PROC\_CODE~~  
64. ~~LIPASE\_PLASMA\_PROC\_NAME~~  
65. ~~NGRAM\_instructed~~  
66. ~~LIPASE\_ (LAB)\_ COMPONENT\_NAME~~  
67. ~~NGRAM\_4^odt~~  
68. ~~NGRAM\_100^sodium~~  
69. ~~VOL(URINE)\_PROC\_NAME~~  
70. ~~LAB100227\_PROC\_CODE~~

71. ~~NEUTROPHIL\_#\_COMPONENT\_NAME~~  
72. ~~LYMPHOCYTE\_#\_COMPONENT\_NAME~~  
73. ~~MONOCYTE\_#\_COMPONENT\_NAME~~  
74. ~~EOS\_#\_COMPONENT\_NAME~~  
75. ~~BASO\_#\_COMPONENT\_NAME~~  
76. ~~NGRAM\_10^tablet~~  
77. ~~OXYCODONE\_HCL/ACETAMINOPHEN\_GENERIC\_NAME\_1~~  
78. ~~NGRAM\_olanzapine~~  
79. ~~NGRAM\_genitourinary~~  
80. ~~ANALGESIC\_OPIOID\_OXYCODONE\_COMBINATIONS\_PHARM\_SUBCLASS\_NAME~~  
81. ~~NGRAM\_90^albuterol~~  
82. ~~NGRAM\_disintegrating~~  
83. ~~ANTICONVULSANT\_\_GABA\_ANALOGS\_PHARM\_SUBCLASS\_NAME~~  
84. ~~NGRAM\_risperidone~~  
85. ~~NGRAM\_0^pramipexole~~  
86. ~~NORMAL\_RANGE\_COMPONENT\_NAME~~  
87. ~~# REMOVED HISTAMINE\_H2 RECEPTOR\_INHIBITORS\_PHARM\_CLASS\_NAME~~  
88. ~~# REMOVED GASTRIC\_ACID\_SECRETION\_REDUCERS\_\_HISTAMINE\_H2 RECEPTOR\_ANTAGONISTS\_PHARM\_SUBCLASS\_NAME~~  
89. ~~NGRAM\_abdominal~~  
90. ~~NGRAM\_0^tablet~~  
91. ~~NGRAM\_pramipexole~~  
92. ~~# REMOVED NGRAM\_17^gram~~  
93. ~~ABDOMINAL\_PAIN\_UNSPECIFIED\_SITE\_DX\_NAME~~  
94. ~~NGRAM\_propranolol~~  
95. ~~NGRAM\_rubs~~  
96. ~~# REMOVED NGRAM\_infusion~~  
97. ~~NGRAM\_pathology~~  
98. ~~NGRAM\_control^pain~~  
99. ~~NGRAM\_flare~~  
100. ~~NGRAM\_hydromorphone~~  
101. ~~CREATININE\_URINE\_CONCENTRATION\_COMPONENT\_NAME~~  
102. ~~NGRAM\_acute^distress~~  
103. ~~NGRAM\_sulfonamide~~  
104. ~~NGRAM\_antibiotics^sulfonamide~~  
105. ~~NGRAM\_depakote~~  
106. ~~NGRAM\_melatonin~~  
107. ~~NGRAM\_abdominal^pain~~  
108. ~~NGRAM\_gram~~  
109. ~~NGRAM\_magnesium~~  
110. ~~FERRITIN\_SERUM\_PROC\_NAME~~  
111. ~~NGRAM\_odt~~  
112. ~~NGRAM\_odt^ondansetron~~  
113. ~~NGRAM\_ambulatory~~

114. ~~NGRAM\_phenergan~~  
115. ~~NGRAM\_flares~~  
116. ~~NGRAM\_mouth^needed~~  
117. ~~NGRAM\_glycol^polyethylene~~  
118. ~~NGRAM\_polyethylene~~  
119. ~~NGRAM\_glycol~~  
120. ~~NGRAM\_psychosis~~  
121. ~~NGRAM\_urine~~  
122. ~~NGRAM\_docusate^sodium~~  
123. ~~NGRAM\_docusate~~  
124. ~~ANTI~~HISTAMINE~~\_1ST\_GENERATION\_  
\_PHENOTHIAZINES\_PHARM\_SUBCLASS\_NAME~~  
125. ~~PROMETHAZINE\_HCL\_GENERIC\_NAME\_1~~  
126. ~~NGRAM\_stomach~~  
127. ~~NGRAM\_ed~~  
128. ~~CREATININEUR(REFERRAL)\_COMPONENT\_NAME~~  
129. ~~MISC\_REF\_TEST\_RESULT\_COMPONENT\_NAME~~  
130. ~~CBC\_WITH\_DIFFERENTIAL\_PROC\_NAME~~  
131. ~~LAB00681\_PROC\_CODE~~  
132. ~~NGRAM\_oral^powder~~  
133. ~~NGRAM\_powder~~  
134. ~~ESSENTIAL\_(PRIMARY)\_HYPERTENSION\_DX\_ICD10\_NAME~~  
135. ~~NGRAM\_sulfa~~  
136. ~~NGRAM\_severe~~  
137. ~~NGRAM\_penicillins~~  
138. ~~NGRAM\_gallops~~  
139. ~~NGRAM\_vicodin~~  
140. ~~MISC\_REF\_TEST\_NAME\_COMPONENT\_NAME~~  
141. ~~NGRAM\_latex~~  
142. ~~NGRAM\_zofran~~  
143. ~~NGRAM\_iv~~  
144. ~~NGRAM\_discharged~~  
145. ~~NGRAM\_nausea~~  
146. ~~NGRAM\_acute~~

## References

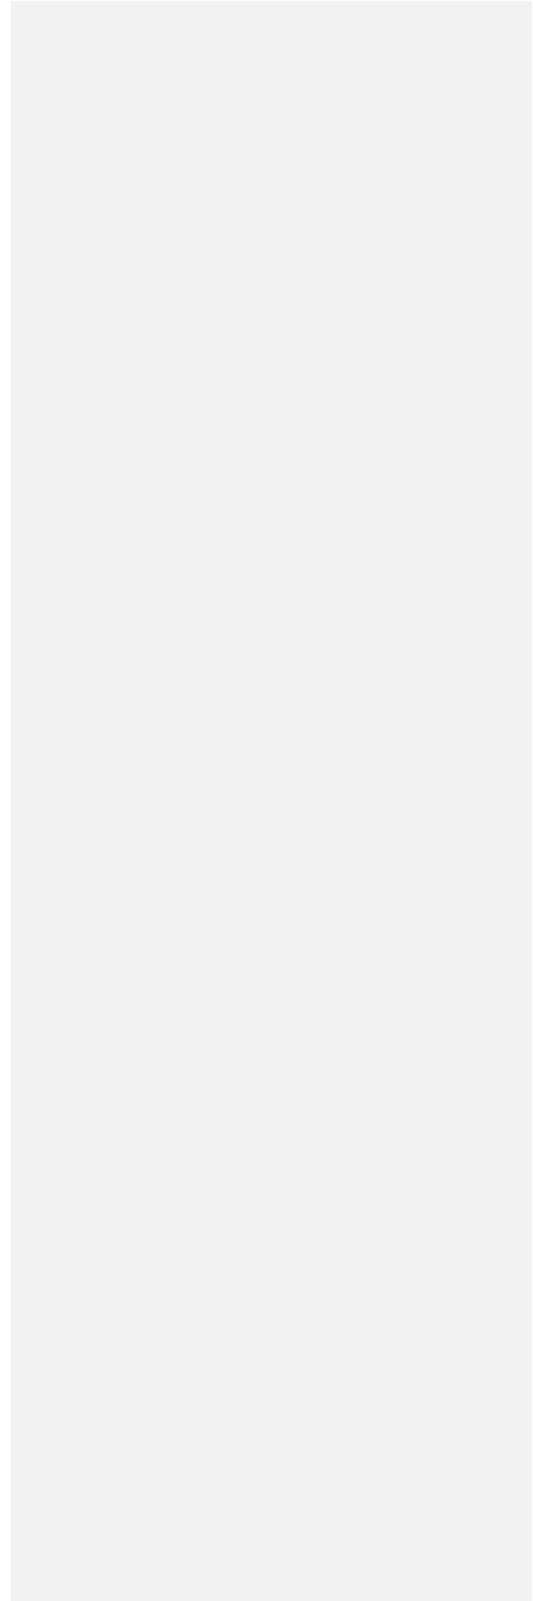

Supplement: pone.0235574.s003.pdf [file pone.0235574.s003.pdf]
