# Supplementary material for: Detecting rare diseases in electronic health records using machine learning and knowledge engineering: Case study of acute hepatic porphyria
Source: PubMed Central journal article supplement (PMC7331997; doi:10.1371/journal.pone.0235574), 2020-07-02
Supplement: pone.0235574.s002.pdf [file pone.0235574.s002.pdf]

# PLOS ONE

## Detecting Rare Diseases in Electronic Health Records Using Machine Learning and Knowledge Engineering: Case Study of Acute Hepatic Porphyria

--Manuscript Draft--

|                              |                                                                                                                                                                                                                                                                                                                                                                                                                                                                                                                                                                                                                                                                                                                                                                                                                                                                                                                                                                                                                                                                                                                                                                                                                                                                                                                                                                                                                                                                                                                                                                                                                                                                                                                                                                                                                                                                                                                                                                                                                                                                                                                                                                                                                                                                                                                                                                                                                                                                                                                                                                                                                                                                                                                                                                                                                                                                                                                                                                                                                                                                                                                                                                                                                                                                                                                               |
|------------------------------|-------------------------------------------------------------------------------------------------------------------------------------------------------------------------------------------------------------------------------------------------------------------------------------------------------------------------------------------------------------------------------------------------------------------------------------------------------------------------------------------------------------------------------------------------------------------------------------------------------------------------------------------------------------------------------------------------------------------------------------------------------------------------------------------------------------------------------------------------------------------------------------------------------------------------------------------------------------------------------------------------------------------------------------------------------------------------------------------------------------------------------------------------------------------------------------------------------------------------------------------------------------------------------------------------------------------------------------------------------------------------------------------------------------------------------------------------------------------------------------------------------------------------------------------------------------------------------------------------------------------------------------------------------------------------------------------------------------------------------------------------------------------------------------------------------------------------------------------------------------------------------------------------------------------------------------------------------------------------------------------------------------------------------------------------------------------------------------------------------------------------------------------------------------------------------------------------------------------------------------------------------------------------------------------------------------------------------------------------------------------------------------------------------------------------------------------------------------------------------------------------------------------------------------------------------------------------------------------------------------------------------------------------------------------------------------------------------------------------------------------------------------------------------------------------------------------------------------------------------------------------------------------------------------------------------------------------------------------------------------------------------------------------------------------------------------------------------------------------------------------------------------------------------------------------------------------------------------------------------------------------------------------------------------------------------------------------------|
| <b>Manuscript Number:</b>    | PONE-D-20-10338                                                                                                                                                                                                                                                                                                                                                                                                                                                                                                                                                                                                                                                                                                                                                                                                                                                                                                                                                                                                                                                                                                                                                                                                                                                                                                                                                                                                                                                                                                                                                                                                                                                                                                                                                                                                                                                                                                                                                                                                                                                                                                                                                                                                                                                                                                                                                                                                                                                                                                                                                                                                                                                                                                                                                                                                                                                                                                                                                                                                                                                                                                                                                                                                                                                                                                               |
| <b>Article Type:</b>         | Research Article                                                                                                                                                                                                                                                                                                                                                                                                                                                                                                                                                                                                                                                                                                                                                                                                                                                                                                                                                                                                                                                                                                                                                                                                                                                                                                                                                                                                                                                                                                                                                                                                                                                                                                                                                                                                                                                                                                                                                                                                                                                                                                                                                                                                                                                                                                                                                                                                                                                                                                                                                                                                                                                                                                                                                                                                                                                                                                                                                                                                                                                                                                                                                                                                                                                                                                              |
| <b>Full Title:</b>           | Detecting Rare Diseases in Electronic Health Records Using Machine Learning and Knowledge Engineering: Case Study of Acute Hepatic Porphyria                                                                                                                                                                                                                                                                                                                                                                                                                                                                                                                                                                                                                                                                                                                                                                                                                                                                                                                                                                                                                                                                                                                                                                                                                                                                                                                                                                                                                                                                                                                                                                                                                                                                                                                                                                                                                                                                                                                                                                                                                                                                                                                                                                                                                                                                                                                                                                                                                                                                                                                                                                                                                                                                                                                                                                                                                                                                                                                                                                                                                                                                                                                                                                                  |
| <b>Short Title:</b>          | Detecting Rare Diseases Using Machine Learning on EHR Data: Case Study of Acute Hepatic Porphyria                                                                                                                                                                                                                                                                                                                                                                                                                                                                                                                                                                                                                                                                                                                                                                                                                                                                                                                                                                                                                                                                                                                                                                                                                                                                                                                                                                                                                                                                                                                                                                                                                                                                                                                                                                                                                                                                                                                                                                                                                                                                                                                                                                                                                                                                                                                                                                                                                                                                                                                                                                                                                                                                                                                                                                                                                                                                                                                                                                                                                                                                                                                                                                                                                             |
| <b>Corresponding Author:</b> | Aaron M. Cohen, M.D.<br>Oregon Health & Science University<br>Portland, OR UNITED STATES                                                                                                                                                                                                                                                                                                                                                                                                                                                                                                                                                                                                                                                                                                                                                                                                                                                                                                                                                                                                                                                                                                                                                                                                                                                                                                                                                                                                                                                                                                                                                                                                                                                                                                                                                                                                                                                                                                                                                                                                                                                                                                                                                                                                                                                                                                                                                                                                                                                                                                                                                                                                                                                                                                                                                                                                                                                                                                                                                                                                                                                                                                                                                                                                                                      |
| <b>Keywords:</b>             | Rare Diseases; Acute Hepatic Porphyria; Machine Learning; Data Science; Electronic Health Record                                                                                                                                                                                                                                                                                                                                                                                                                                                                                                                                                                                                                                                                                                                                                                                                                                                                                                                                                                                                                                                                                                                                                                                                                                                                                                                                                                                                                                                                                                                                                                                                                                                                                                                                                                                                                                                                                                                                                                                                                                                                                                                                                                                                                                                                                                                                                                                                                                                                                                                                                                                                                                                                                                                                                                                                                                                                                                                                                                                                                                                                                                                                                                                                                              |
| <b>Abstract:</b>             | <p><b>Background:</b> With the growing adoption of the electronic health record (EHR) worldwide over the last decade, new opportunities exist for leveraging EHR data for detection of rare diseases. Rare diseases are often not diagnosed or delayed in diagnosis by clinicians who encounter them infrequently. One such rare disease that may be amenable to EHR-based detection is acute hepatic porphyria (AHP). AHP consists of a family of rare, metabolic diseases characterized by potentially life-threatening acute attacks and, for some patients, chronic debilitating symptoms that negatively impact daily functioning and quality of life. The goal of this study was to apply machine learning and knowledge engineering to a large extract of EHR data to determine whether they could be effective in identifying patients not previously tested for AHP who should receive a proper diagnostic workup for AHP.</p> <p><b>Methods and Findings:</b> We used an extract of the complete EHR data of 200,000 patients from an academic medical center for up to 10 years longitudinally and enriched it with records from an additional 5,571 patients from the center containing any mention of porphyria in notes, laboratory tests, diagnosis codes, and other parts of the record. After manually reviewing all patients with the ICD-10-CM code E80.21 (Acute intermittent [hepatic] porphyria), we identified 30 patients who were positive cases for our machine learning models, with the rest of the patients used as negative cases. We parsed the record into features, which were scored by frequency of appearance and labeled by the EHR source document. We then carried out a univariate feature analysis, manually choosing features not directly tied to provider attributes or suspicion of the patient having AHP. We next trained on the full dataset, with the best cross-validation performance coming from support vector machine (SVM) algorithm using a radial basis function (RBF) kernel. The trained model was applied back to the full data set and patients were ranked by margin distance. The top 100 ranked negative cases were manually reviewed for symptom complexes similar to AHP, finding four patients where AHP diagnostic testing was likely indicated and 18 patients where AHP diagnostic testing was possibly indicated. From the top 100 ranked cases of patients with mention of porphyria in their record, we identified four patients for whom AHP diagnostic testing was possibly indicated and had not been previously performed. Based solely on the reported prevalence of AHP, we would have expected only 0.002 cases out of the 200 patients manually reviewed.</p> <p><b>Conclusions:</b> The application of machine learning and knowledge engineering to EHR data may facilitate the diagnosis of rare diseases such as AHP. The only manual modifications to this work were the removal of disease-specific or medical center specific features that might undermine our ability to find new cases. Further work will recommend clinical investigation to identified patients' clinicians, evaluate more patients, assess additional feature selection and machine learning algorithms, and apply this methodology to other rare diseases.</p> |
| <b>Order of Authors:</b>     | Aaron M. Cohen, M.D.<br>Steven Chamberlin                                                                                                                                                                                                                                                                                                                                                                                                                                                                                                                                                                                                                                                                                                                                                                                                                                                                                                                                                                                                                                                                                                                                                                                                                                                                                                                                                                                                                                                                                                                                                                                                                                                                                                                                                                                                                                                                                                                                                                                                                                                                                                                                                                                                                                                                                                                                                                                                                                                                                                                                                                                                                                                                                                                                                                                                                                                                                                                                                                                                                                                                                                                                                                                                                                                                                     |

|                                                                                                                                                                                                                                                                                                                                                                                                                                                                                                                                                                                                                                                                                                                                                                                                                                                                                                                                                                                                                                                                                                                                                                                                                                                                                                                                                                                     |                                                                                                                                                                                                                                                                                                                                                                                                                                                                                                                                                                                                                                                                                                                                                 |
|-------------------------------------------------------------------------------------------------------------------------------------------------------------------------------------------------------------------------------------------------------------------------------------------------------------------------------------------------------------------------------------------------------------------------------------------------------------------------------------------------------------------------------------------------------------------------------------------------------------------------------------------------------------------------------------------------------------------------------------------------------------------------------------------------------------------------------------------------------------------------------------------------------------------------------------------------------------------------------------------------------------------------------------------------------------------------------------------------------------------------------------------------------------------------------------------------------------------------------------------------------------------------------------------------------------------------------------------------------------------------------------|-------------------------------------------------------------------------------------------------------------------------------------------------------------------------------------------------------------------------------------------------------------------------------------------------------------------------------------------------------------------------------------------------------------------------------------------------------------------------------------------------------------------------------------------------------------------------------------------------------------------------------------------------------------------------------------------------------------------------------------------------|
|                                                                                                                                                                                                                                                                                                                                                                                                                                                                                                                                                                                                                                                                                                                                                                                                                                                                                                                                                                                                                                                                                                                                                                                                                                                                                                                                                                                     | Thomas Deloughery                                                                                                                                                                                                                                                                                                                                                                                                                                                                                                                                                                                                                                                                                                                               |
|                                                                                                                                                                                                                                                                                                                                                                                                                                                                                                                                                                                                                                                                                                                                                                                                                                                                                                                                                                                                                                                                                                                                                                                                                                                                                                                                                                                     | Michelle Nguyen                                                                                                                                                                                                                                                                                                                                                                                                                                                                                                                                                                                                                                                                                                                                 |
|                                                                                                                                                                                                                                                                                                                                                                                                                                                                                                                                                                                                                                                                                                                                                                                                                                                                                                                                                                                                                                                                                                                                                                                                                                                                                                                                                                                     | Steven Bedrick                                                                                                                                                                                                                                                                                                                                                                                                                                                                                                                                                                                                                                                                                                                                  |
|                                                                                                                                                                                                                                                                                                                                                                                                                                                                                                                                                                                                                                                                                                                                                                                                                                                                                                                                                                                                                                                                                                                                                                                                                                                                                                                                                                                     | Stephen Meninger                                                                                                                                                                                                                                                                                                                                                                                                                                                                                                                                                                                                                                                                                                                                |
|                                                                                                                                                                                                                                                                                                                                                                                                                                                                                                                                                                                                                                                                                                                                                                                                                                                                                                                                                                                                                                                                                                                                                                                                                                                                                                                                                                                     | John J. Ko                                                                                                                                                                                                                                                                                                                                                                                                                                                                                                                                                                                                                                                                                                                                      |
|                                                                                                                                                                                                                                                                                                                                                                                                                                                                                                                                                                                                                                                                                                                                                                                                                                                                                                                                                                                                                                                                                                                                                                                                                                                                                                                                                                                     | Jigar J. Amin                                                                                                                                                                                                                                                                                                                                                                                                                                                                                                                                                                                                                                                                                                                                   |
|                                                                                                                                                                                                                                                                                                                                                                                                                                                                                                                                                                                                                                                                                                                                                                                                                                                                                                                                                                                                                                                                                                                                                                                                                                                                                                                                                                                     | Alex J. Wei                                                                                                                                                                                                                                                                                                                                                                                                                                                                                                                                                                                                                                                                                                                                     |
|                                                                                                                                                                                                                                                                                                                                                                                                                                                                                                                                                                                                                                                                                                                                                                                                                                                                                                                                                                                                                                                                                                                                                                                                                                                                                                                                                                                     | William Hersh                                                                                                                                                                                                                                                                                                                                                                                                                                                                                                                                                                                                                                                                                                                                   |
| <b>Additional Information:</b>                                                                                                                                                                                                                                                                                                                                                                                                                                                                                                                                                                                                                                                                                                                                                                                                                                                                                                                                                                                                                                                                                                                                                                                                                                                                                                                                                      |                                                                                                                                                                                                                                                                                                                                                                                                                                                                                                                                                                                                                                                                                                                                                 |
| <b>Question</b>                                                                                                                                                                                                                                                                                                                                                                                                                                                                                                                                                                                                                                                                                                                                                                                                                                                                                                                                                                                                                                                                                                                                                                                                                                                                                                                                                                     | <b>Response</b>                                                                                                                                                                                                                                                                                                                                                                                                                                                                                                                                                                                                                                                                                                                                 |
| <p><b>Financial Disclosure</b></p> <p>Enter a financial disclosure statement that describes the sources of funding for the work included in this submission. Review the <a href="#">submission guidelines</a> for detailed requirements. View published research articles from <a href="#">PLOS ONE</a> for specific examples.</p> <p>This statement is required for submission and <b>will appear in the published article</b> if the submission is accepted. Please make sure it is accurate.</p> <p><b>Unfunded studies</b><br/>Enter: <i>The author(s) received no specific funding for this work.</i></p> <p><b>Funded studies</b><br/>Enter a statement with the following details:</p> <ul style="list-style-type: none"> <li>• Initials of the authors who received each award</li> <li>• Grant numbers awarded to each author</li> <li>• The full name of each funder</li> <li>• URL of each funder website</li> <li>• Did the sponsors or funders play any role in the study design, data collection and analysis, decision to publish, or preparation of the manuscript?</li> <li>• <b>NO</b> - Include this sentence at the end of your statement: <i>The funders had no role in study design, data collection and analysis, decision to publish, or preparation of the manuscript.</i></li> <li>• <b>YES</b> - Specify the role(s) played.</li> </ul> <p>* typeset</p> | <p>AC, BH, SC, and MN received support for this work from Alnylam Pharmaceuticals, Inc., Cambridge, MA.</p> <p>SM, JK, JA and AW are/were employees of Alnylam Pharmaceuticals, Inc., Cambridge, MA during the time of this research.</p> <p>This work was funded and the associated editorial support was provided by Alnylam Pharmaceuticals, Inc., Cambridge, MA.<br/>Grant number 4510005336<br/><a href="https://www.alnylam.com/">https://www.alnylam.com/</a></p> <p>Alnylam participated in algorithm design and preparation of the manuscript. They had no role in the evaluation or EHR data collection and analysis, nor did they have any access to the individual patient electronic health record data used in this research.</p> |
| <b>Competing Interests</b>                                                                                                                                                                                                                                                                                                                                                                                                                                                                                                                                                                                                                                                                                                                                                                                                                                                                                                                                                                                                                                                                                                                                                                                                                                                                                                                                                          | I have read the journal's policy and the authors of this manuscript have the following                                                                                                                                                                                                                                                                                                                                                                                                                                                                                                                                                                                                                                                          |

|                                                                                                                                                                                                                                                                                                                                                                                                                                                                                                                                                                                                                                                                                                                                                                                                                                                                                                                                                                                               |                                                                                                                                                                 |
|-----------------------------------------------------------------------------------------------------------------------------------------------------------------------------------------------------------------------------------------------------------------------------------------------------------------------------------------------------------------------------------------------------------------------------------------------------------------------------------------------------------------------------------------------------------------------------------------------------------------------------------------------------------------------------------------------------------------------------------------------------------------------------------------------------------------------------------------------------------------------------------------------------------------------------------------------------------------------------------------------|-----------------------------------------------------------------------------------------------------------------------------------------------------------------|
| <p>Use the instructions below to enter a competing interest statement for this submission. On behalf of all authors, disclose any <a href="#">competing interests</a> that could be perceived to bias this work—acknowledging all financial support and any other relevant financial or non-financial competing interests.</p> <p>This statement <b>will appear in the published article</b> if the submission is accepted. Please make sure it is accurate. View published research articles from <a href="#">PLOS ONE</a> for specific examples.</p> <p><b>NO authors have competing interests</b></p> <p>Enter: <i>The authors have declared that no competing interests exist.</i></p> <p><b>Authors with competing interests</b></p> <p>Enter competing interest details beginning with this statement:</p> <p><i>I have read the journal's policy and the authors of this manuscript have the following competing interests: [insert competing interests here]</i></p> <p>* typeset</p> | <p>competing interests:</p> <p>GIVLAARI is a product of Alnylam. GIVLAARI is a prescription medicine used to treat acute hepatic porphyria (AHP) in adults.</p> |
| <p><b>Ethics Statement</b></p> <p>Enter an ethics statement for this submission. This statement is required if the study involved:</p> <ul style="list-style-type: none"> <li>• Human participants</li> <li>• Human specimens or tissue</li> <li>• Vertebrate animals or cephalopods</li> <li>• Vertebrate embryos or tissues</li> <li>• Field research</li> </ul> <p>Write "N/A" if the submission does not require an ethics statement.</p> <p>General guidance is provided below. Consult the <a href="#">submission guidelines</a> for</p>                                                                                                                                                                                                                                                                                                                                                                                                                                                | <p>This study protocol was approved by the OHSU Institutional Review Board (IRB00011159).</p>                                                                   |

detailed instructions. **Make sure that all information entered here is included in the Methods section of the manuscript.**

#### Format for specific study types

##### Human Subject Research (involving human participants and/or tissue)

- Give the name of the institutional review board or ethics committee that approved the study
- Include the approval number and/or a statement indicating approval of this research
- Indicate the form of consent obtained (written/oral) or the reason that consent was not obtained (e.g. the data were analyzed anonymously)

##### Animal Research (involving vertebrate animals, embryos or tissues)

- Provide the name of the Institutional Animal Care and Use Committee (IACUC) or other relevant ethics board that reviewed the study protocol, and indicate whether they approved this research or granted a formal waiver of ethical approval
- Include an approval number if one was obtained
- If the study involved *non-human primates*, add *additional details* about animal welfare and steps taken to ameliorate suffering
- If anesthesia, euthanasia, or any kind of animal sacrifice is part of the study, include briefly which substances and/or methods were applied

##### Field Research

Include the following details if this study involves the collection of plant, animal, or other materials from a natural setting:

- Field permit number
- Name of the institution or relevant body that granted permission

##### Data Availability

Authors are required to make all data underlying the findings described fully available, without restriction, and from the time of publication. PLOS allows rare

No - some restrictions will apply

exceptions to address legal and ethical concerns. See the [PLOS Data Policy](#) and [FAQ](#) for detailed information.

A Data Availability Statement describing where the data can be found is required at submission. Your answers to this question constitute the Data Availability Statement and **will be published in the article**, if accepted.

**Important:** Stating 'data available on request from the author' is not sufficient. If your data are only available upon request, select 'No' for the first question and explain your exceptional situation in the text box.

Do the authors confirm that all data underlying the findings described in their manuscript are fully available without restriction?

**Describe where the data may be found in full sentences. If you are copying our sample text, replace any instances of XXX with the appropriate details.**

- If the data are **held or will be held in a public repository**, include URLs, accession numbers or DOIs. If this information will only be available after acceptance, indicate this by ticking the box below. For example: *All XXX files are available from the XXX database (accession number(s) XXX, XXX).*
- If the data are all contained **within the manuscript and/or Supporting Information files**, enter the following: *All relevant data are within the manuscript and its Supporting Information files.*
- If neither of these applies but you are able to provide **details of access elsewhere**, with or without limitations, please do so. For example:

*Data cannot be shared publicly because of [XXX]. Data are available from the XXX Institutional Data Access / Ethics Committee (contact via XXX) for researchers who meet the criteria for*

The patient data underlying the analysis cannot be released publicly because of HIPPA and other legal requirements. Data can be made available from OHSU for researchers who have an approved study and complete an appropriate data use agreement with OHSU.

The full set of final machine learning model features are included in Supplemental Table 1.

*access to confidential data.*

*The data underlying the results presented in the study are available from (include the name of the third party and contact information or URL).*

- This text is appropriate if the data are owned by a third party and authors do not have permission to share the data.

\* typeset

Additional data availability information:

Tick here if your circumstances are not covered by the questions above and you need the journal's help to make your data available.

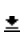

## Detecting Rare Diseases in Electronic Health Records Using Machine Learning and Knowledge Engineering: Case Study of Acute Hepatic Porphyrria

Aaron Cohen, MD, MS <sup>1\*</sup>  
Steven Chamberlin, ND <sup>1</sup>  
Thomas Deloughery, MD <sup>1</sup>  
Michelle Nguyen, BS <sup>1</sup>  
Steven Bedrick, PhD <sup>1</sup>  
Stephen Meninger, PharmD <sup>2</sup>  
John J. Ko, PharmD, MS <sup>2</sup>  
Jigar Amin, PharmD <sup>2</sup>  
Alex Wei, PharmD <sup>2</sup>  
William Hersh, MD <sup>1</sup>

<sup>1</sup>Department of Medical Informatics & Clinical Epidemiology, School of Medicine, Oregon Health & Science University, Portland, OR USA.

<sup>2</sup>Alnylam Pharmaceuticals, Cambridge, MA, USA.

\* Corresponding Author:

Aaron M. Cohen, MD MS

Professor

Department of Medical Informatics & Clinical Epidemiology

School of Medicine

Oregon Health & Science University

Portland, Oregon USA 97239

Email: [cohenaa@ohsu.edu](mailto:cohenaa@ohsu.edu)

# 1 **Abstract**

## 2 Background

3 With the growing adoption of the electronic health record (EHR) worldwide over the last decade,  
4 new opportunities exist for leveraging EHR data for detection of rare diseases. Rare diseases are  
5 often not diagnosed or delayed in diagnosis by clinicians who encounter them infrequently. One  
6 such rare disease that may be amenable to EHR-based detection is acute hepatic porphyria  
7 (AHP). AHP consists of a family of rare, metabolic diseases characterized by potentially life-  
8 threatening acute attacks and, for some patients, chronic debilitating symptoms that negatively  
9 impact daily functioning and quality of life. The goal of this study was to apply machine learning  
10 and knowledge engineering to a large extract of EHR data to determine whether they could be  
11 effective in identifying patients not previously tested for AHP who should receive a proper  
12 diagnostic workup for AHP.

13

## 14 Methods and Findings

15 We used an extract of the complete EHR data of 200,000 patients from an academic medical  
16 center for up to 10 years longitudinally and enriched it with records from an additional 5,571  
17 patients from the center containing any mention of porphyria in notes, laboratory tests, diagnosis  
18 codes, and other parts of the record. After manually reviewing  patients with the ICD-10-CM  
19 code E80.21 (Acute intermittent [hepatic] porphyria), we identified 30 patients who were  
20 positive cases for our machine learning models, with the rest of the patients used as negative  
21 cases. We parsed the record into features, which were scored by frequency of appearance and  
22 labeled by the EHR source document. We then carried out a univariate feature analysis, manually  
23 choosing features not directly tied to provider attributes or suspicion of the patient having AHP.



24 We next trained on the full dataset, with the best cross-validation performance coming from  
25 support vector machine (SVM) algorithm using a radial basis function (RBF) kernel. The trained  
26 model was applied back to the full data set and patients were ranked by margin distance. The top  
27 100 ranked negative cases were manually reviewed for symptom complexes similar to AHP,  
28 finding four patients where AHP diagnostic testing was likely indicated and 18 patients where  
29 AHP diagnostic testing was possibly indicated. From the top 100 ranked cases of patients with  
30 mention of porphyria in their record, we identified four patients for whom AHP diagnostic  
31 testing was possibly indicated and had not been previously performed. Based solely on the  
32 reported prevalence of AHP, we would have expected only 0.002 cases out of the 200 patients  
33 manually reviewed.

34

## 35 Conclusions

36 The application of machine learning and knowledge engineering to EHR data may facilitate the  
37 diagnosis of rare diseases such as AHP. The only manual modifications to this work were the  
38 removal of disease-specific or medical center specific features that might undermine our ability  
39 to find new cases. Further work will recommend clinical investigation to identified patients'  
40 clinicians, evaluate more patients, assess additional feature selection and machine learning  
41 algorithms, and apply this methodology to other rare diseases.

42

## 43 **Introduction**

44 The growing adoption of the electronic health record (EHR) worldwide has created new  
45 opportunities for leveraging EHR data for other, so called *secondary* purposes, such as clinical  
46 and translational research, quality measurement and improvement, patient cohort identification

47 and more [1]. One emerging use case for leveraging of EHR data is to detect undiagnosed rare  
48 diseases. Although there is no absolute definition of a rare disease, the US Rare Diseases Act of  
49 2002 defines rare diseases as those that occur in fewer than 200,000 patients worldwide [2], and  
50 the National Organization for Rare Disorders (NORD, <https://rarediseases.org/>) registry lists  
51 more than 1,200 diseases. Others have noted that the true number of rare diseases is unknown,  
52 and have called for more research to define them [3].

53  
54 Rare diseases can be difficult to diagnose because their infrequent occurrence may result in  
55 primary care physicians not considering them in diagnostic workup. They also often have  
56 general presentations with diffuse symptoms, as well as genetic components which may require  
57 specialized testing. This lack of timely diagnosis may lead to both physical and emotional  
58 suffering as patients remain undiagnosed for prolonged periods. Additionally, a lack of accurate  
59 diagnoses increases economic burden to healthcare systems as patients continue to receive  
60 inadequate and/or inappropriate treatment. Some informatics researchers have used EHR data to  
61 detect rare diseases, such as cardiac amyloidosis [4], lipodystrophy [5], and a large collection of  
62 different diseases [6, 7].

63  
64 One rare disease that may be amenable to EHR-based detection is acute hepatic porphyria  
65 (AHP). AHP is a subset of porphyria that refers to a family of rare, metabolic diseases  
66 characterized by potentially life-threatening acute attacks and, for some patients, chronic  
67 debilitating symptoms that negatively impact daily functioning and quality of life [8-12]. During  
68 attacks, patients typically present with multiple signs and symptoms due to dysfunction across  
69 the autonomic, central, and peripheral nervous systems. The prevalence of diagnosed

70 symptomatic AHP patients is ~1 per 100,000 [13]. Due to the nonspecific symptoms and the rare  
71 nature of the disease, AHP is often initially overlooked or misdiagnosed. A U.S. study  
72 demonstrated that diagnosis of AHP is delayed on average by up to 15 years [14].

73

74  AHP is predominantly caused by a genetic mutation leading to a partial deficiency in the activity  
75 of one of the eight enzymes responsible for heme synthesis [11]. These defects predispose  
76 patients to the accumulation of neurotoxic heme intermediates aminolevulinic acid (ALA) and  
77 porphobilinogen (PBG) when the rate limiting enzyme of the heme synthesis pathway,  
78 aminolevulinic acid synthase 1 (ALAS1), is induced [9, 15]. Gene mutations causing the disease  
79 are mostly autosomal dominant, however the disease has low penetrance (~1%) and many  
80 specific mutations have not been identified [16]. Furthermore, families carrying the gene may  
81 have few or only one affected member. Therefore, family history can be a poor diagnostic tool  
82 for this disease. The preferred diagnostic procedure for AHP is biochemical testing of  
83 random/spot urine for ALA, PBG, and porphyrins [17, 18].

84

85 Historically, treatment of AHP has predominantly focused on avoidance of attack triggers,  
86 management of pain and other chronic symptoms, and treatment of acute attacks through the use  
87 of Panhematin<sup>®</sup> (hemin for injection).  Panhematin was FDA approved in 1983 for the  
88 amelioration of recurrent attacks of acute intermittent porphyria (AIP) temporally related to the  
89 menstrual cycle in susceptible women after initial carbohydrate therapy is known or suspected to  
90 be inadequate [19].

91

92 Recently, a new drug Givlaari<sup>®</sup> (givosiran), for subcutaneous injection has been approved by the  
93 FDA for the treatment of adults with AHP. Givosiran is a double-stranded small interfering RNA  
94 (siRNA) molecule that reduces induced levels of the protein ALAS1. A Phase 1 trial has been  
95 published [20] and a Phase 3 randomized control trial has shown this therapy to be effective in  
96 reducing the occurrence of acute attacks and impacting other manifestations of the disease [21].

97 Oregon Health & Science University (OHSU) is the only academic medical center in Oregon and  
98 is thus a referral center for rare diseases like AHP. The OHSU Research Data Warehouse (RDW)  
99 is a research data “honest broker” service that provides EHR data to researchers, with  
100 appropriate IRB approval. The investigators have an ongoing institutional review board (IRB)  
101 approval to use an extract from the Oregon Health & Science University (OHSU) EHR research  
102 data warehouse (RDW) for a series of patient cohort identification projects. For this research, the  
103 patient cohort to identify was defined as those patients who have a documented clinical history  
104 of AHP, or a clinical history indicating that AHP diagnostic testing may be appropriate. The goal  
105 of this study was to apply machine learning and knowledge engineering to a large extract of EHR  
106 data to determine whether the combined approach could be effective in identifying patients not  
107 previously tested for AHP who should receive a proper diagnostic workup for AHP. This study  
108 protocol was approved by the OHSU Institutional Review Board (IRB00011159).

## 109 **Materials and Methods**

110

### 111 *Dataset*

112 A large dataset of approximately 200,000 patient records was requested from the RDW,  
113 complete as of the data pull date in March 20 including over 30 million text notes plus other

114 document types. These records corresponded to patients who had more than one primary care  
115 health care visit at our institution. Each patient record was represented as a collection of  
116 documents of types given in **Table 1**. Patient records could include zero or more documents of  
117 each type.

118  
119 To insure an adequate number of number of patients to make predictive models robust, we  
120 enriched the data set for possible AHP by adding records from an additional 5,571 patients who  
121 met one or more of the following case-insensitive criteria (see **Table 2**):

- 122 • Diagnosis including “porph” in the diagnosis name
- 123 • Medication including “hep” in the medication name
- 124 • Procedure including “porph” in the procedure name
- 125 • Clinical or result note including “porph” in the note text

126  
127 To develop a gold standard for the data, a medical student (MN), overseen by clinical expert  
128 among the rest of the authors, identified patients with a high likelihood of AHP. We manually  
129 reviewed all the patients with the ICD-10-CM code E80.21 (Acute intermittent [hepatic]  
130 porphyria) in their record, looking for positive confirmation of AHP either through a lab test or a  
131 specific comment in a progress note. This process yielded 30 positive cases from the 47 coded  
132 for E80.21. As OHSU is the only academic medical center in Oregon and is thus a referral center  
133 for rare diseases like AHP, this may explain why the number of identified AHP patients in our  
134 database was higher than that which would be expected based on the global prevalence of AHP.  
135 The rest of the records were then assumed to be negative for AHP for the purposes of statistical  
136 analysis and machine learning.

137 We then deconstructed each patient record into a number of features to be used for machine  
138 learning. Structured data fields were encoded directly with the entire field content used as the  
139 feature. Free-text fields were parsed into unigrams and bigrams. All features were labeled with  
140 their source **document**. This enabled, for example, ICD-10-CM codes in the problem list to be  
141 distinguished from the same ICD-10-CM codes appearing in an encounter diagnosis. Feature  
142 values were encoded as the number of occurrences in the entire record for the patient. A  
143 summary of the types and counts of documents in the data set is shown in **Table 3**.

#### 144 *Machine Learning Model Feature Selection and Training*

145 Features to be included in the machine learning model were then selected by performing  
146 univariate analysis of the entire feature set, using the confirmed AHP patients as positive  
147 samples and the rest of the data set as negative samples. For each document type, the 100 top  
148 features were chosen, ranked by odds ratio, having a p-value < 0.01 and occurring in at least  
149 positive case patient records.

150 From these several hundred features, a **manual review process** was performed to ensure that none  
151 of these features were directly connected to a diagnosis of AHP, mention of AHP in the record,  
152 or treatment of AHP. This process eliminated all text features mentioning any bigram of “acute  
153 hepatic porphyria,” medications such as hematin, and laboratory codes that in the OHSU system  
154 represented tests specifically for the diagnosis of porphyria.

155 **This process reduced the set to approximately 200 features.** These features were then evaluated  
156 by using them in a machine learning model and scoring the model using 5 repetitions of 2-fold  
157 cross-validation. **These experiments found that an SVM with the radial basis function (RBF)**  
158 **kernel scored best for the ranking metrics AUC and average precision.** Linear SVM, random  
159 **forests, Adaboost, J48, and several topologies of Neural Network were also tried but failed to**

160 perform as well as the RBF SVM. It was also determined that feature values were best encoded  
161 using log normalization, transforming feature occurrence counts into values between 0.0 and 1.0.  
162 Binary encoding, as well as linear normalization, failed to perform as well.  used the  
163 SVMLight implementation of the RBF kernel. Experimentation with cross-validation showed  
164 gamma = 0.04 to be optimal.

165 After algorithm selection, a second round of feature screening was performed. Any features with  
166 non-zero weights in the SVM model were removed if any direct connection to AHP could be  
167 established. **This was performed by close scrutiny and discussion with clinical experts on each** 

**168 feature.** For example, based on case series evidence, clinical hematology AHP specialists  
169 sometimes use cimetidine to treat AHP symptoms, as it is known to block a portion of the heme  
170 synthesis pathway as a side effect [22]. We found that cimetidine was a highly weighted feature  
171 in our initial models (due to its use by a specialist [TD] at OHSU based on case report data [22])  
172 that had to be removed as it is given in response to AHP rather than being predictive. **This**

**173 process resulted in 146 total features being included in the final model.** 

174 **The 146 features included in the final model are shown in Table S-1. Final feature set cross-**  
**175 validation performance on the entire training set is shown in Table 4.** 

176 *Machine Learning for AHP Prediction and Evaluation Methodology*

177 A final trained model using the features selected was created by training the **model**  the entire  
178 data set. This model was then applied back to the entire data set in order to create an AHP  
179 prediction score for each patient. The classifier margin distance was taken as the prediction  
180 score.

181 The patient prediction scores were then analyzed. In particular, the range of scores obtained for  
182 the 30 confirmed positive training cases were compared to the rest of the patients in the data set.  
183 About 22,000 patients in the general population had scores that overlapped with those of the 30  
184 positive patients. While this was only 10% of the patient records, it was more than could be  
185 manually reviewed. We decided to review the top scoring 100 cases manually from each of two  
186 subsets of the general population.

187 The first reviewed subset of 100 patients were those with no mention of porphyria in their chart,  
188 no related ICD-9-CM or ICD-10-CM codes, and no porphyria specific lab test. We selected the  
189 top scoring 100 patients that met these criteria. This represents the most important target  
190 population for our project – patients with persistent symptoms that have not had AHP considered  
191 and tested to rule it in or out as a diagnosis. Manual review of these cases is intended to  
192 demonstrate the potential of our proposed approach to identify potential cases of AHP that would  
193 benefit from diagnostic testing and follow up.

194 The second reviewed subset of 100 patients were those with a mention of porphyria in the text  
195 notes in their chart, but no related ICD-9-CM or ICD-10-CM diagnosis codes, and no porphyria-  
196 specific lab test. These are patients where porphyria may have been considered by the clinician,  
197 or may have been tested at another health care facility with unavailable records, or may have  
198 been a work up in progress. Manual review of these cases was intended to discern the clinical  
199 face validity of the algorithmic predictions, that is, the high scoring patients in this group score  
200 high because the algorithm is paying attention to some of the same non-AHP-specific clinical  
201 symptoms and other variables as the clinician. While the manual review of these patients was  
202 primarily intended for gaining insight into how the algorithm was scoring patients with porphyria



203 mentioned in the charts, based on the manual review some patients who may benefit from  
204 diagnostic testing could be found.

205 A clinically trained reviewer assessed the patients' records in these two non-overlapping subsets  
206 for symptom patterns consistent with acute hepatic porphyria (AHP). The reviewer was blinded  
207 to the model features. Clinical notes were searched for the 'classic triad' of AHP symptoms:  
208 abdominal pain, central nervous system abnormalities, and peripheral neuropathy [23]. In  
209 addition, any report of pain was assessed, and searches were also conducted for the highest  
210 incident AHP symptoms: abdominal pain, vomiting, constipation, muscle weakness, psychiatric  
211 symptoms, limb, head, neck, or chest pain, hypertension, tachycardia, convulsion, sensory loss,  
212 fever, respiratory paralysis, diarrhea [23]. All major comorbidities were also reviewed and  
213 documented, as well as alternative diagnoses to explain AHP symptom profiles.

214 The 100 patients with no mention of porphyria in their EHR record were classified into one of  
215 three categories: *AHP diagnostic testing likely indicated*, *AHP diagnostic testing possibly*  
216 *indicated*, and *AHP diagnostic testing unlikely indicated*. To be classified as *likely*, symptoms  
217 had to be present in all three categories of the 'classic triad', without a cause identified in the  
218 EHR, and with a substantial history of symptoms. To be classified as *possibly*, symptoms had to  
219 be present in at least one of the three categories, without a cause documented and with a  
220 substantial history. Patients were classified as *unlikely* if their symptoms could be explained by  
221 another diagnosis, or if they did not have a strong AHP symptom profile.

222 The 100 patients who did have a mention of porphyria in their clinical notes were classified into  
223 one of five categories of AHP status based on chart review and details in the clinical notes: *AHP*  
224 *already suspected*, *AHP already suspected but ruled out*, *diagnostic testing likely indicated but*  
225 *AHP not suspected*, *unlikely AHP*, and *AHP diagnosis mentioned in notes*. A patient was

226 classified as *AHP already suspected* if there was any level of AHP suspicion mentioned in their  
227 clinical notes, without a formal diagnosis or lab test. *AHP already suspected but ruled out* was  
228 assigned if there was a suspicion of AHP in the note, but had been ruled out, usually by negative  
229 lab tests. These lab tests were only documented in the note, since we excluded patients from this  
230 subset who had lab tests in the laboratory data itself. *Diagnostic testing likely indicated but AHP*  
231 *not suspected* was assigned if there were symptoms present in at least one of the three triad  
232 categories, without a cause, but no suspicion of AHP mentioned in the notes. For these patients  
233 the clinical notes contained the string ‘porph’ but presence of ‘porph’ in the clinical note was not  
234 related to suspicion of AHP. *Unlikely AHP* was assigned if AHP type symptoms could be  
235 explained by another diagnosis, or there was not a strong AHP symptom profile. Finally, patients  
236 were assigned to *AHP diagnosis* if there was any mention of an existing AHP diagnosis in the  
237 notes, even patient reported. The reasons for the presence of the string ‘porph’ in the clinical note  
238 for the second set of 100 patients was also reviewed and documented. Patient’s categorized as  
239 *AHP already suspected* and *Diagnostic testing likely indicated but AHP not suspected* would  
240 benefit from AHP testing as they displayed suspicion of AHP or symptom complexes associated  
241 with AHP but have yet received a full diagnostic work-up.

242 **Figure 1 shows a flowchart of the overall patient record filtering and manual review process.**  The  
243 process starts with **204,413 patient records,**  and using a combination of machine learning and  
244 structured data filtering described above, identifies 200 patients that were manually reviewed.  
245 100 of those patients were identified as not having any mention of porphyria in the medical  
246 record and potentially could benefit from AHP diagnostic testing. The other 100 of those patients  
247 did have mention of porphyria in their medical record, but no diagnostic code for porphyria.  
248 These records were reviewed to determine the reason for the mention of porphyria and evaluate

249 whether these reasons were consistent with the goal of the machine learning to identify patients  
250 with symptoms and other clinical features consistent with a possible porphyria diagnosis.

251

## 252 **Results**

253 Out of the 100 patient charts we reviewed with no mention of porphyria, four were identified as  
254 likely to *AHP diagnostic testing likely indicated*, all without mention of porphyria in their  
255 medical record or documentation of a urine PBG test. The first patient was a male with six years  
256 of unexplained intermittent abdominal pain with nausea, vomiting, and diarrhea. His other  
257 conditions included complex regional pain syndrome, peripheral neuropathy, cardiac  
258 arrhythmias, panic attacks, and depression. The next patient was a female whose abdominal pain  
259 was described as ‘a long standing symptom with extensive negative evaluation’. Also listed in  
260 her profile were neuralgias, hereditary small fiber neuropathy, movement disorder, fibromyalgia,  
261 migraines, palpitations, and somatization disorder. The third patient was a woman with multiple  
262 emergency department admissions for severe abdominal pain. She also had severe suicidality  
263 with a permanent tracheostomy due to a hanging attempt, borderline personality disorder,  
264 tachycardia, anxiety, saddle anesthesia, insomnia, and severe somatization disorder including a  
265 comment in her note advising not to admit the patient for only vague complaints. The fourth  
266 patient was a female with a history of abdominal pain comments in the notes describing that the  
267 etiology had not been identified for her complex symptomology which included headaches,  
268 abdominal pain, paresthesias and palpitations.

269

270 Overall, about a quarter of the 100 patients in the group without mention of porphyria had  
271 symptom profiles that were consistent with undiagnosed AHP and AHP diagnostic testing would

272 either be likely or possibly indicated (**Table 5**). In this group there was no sign or suspicion of  
273 AHP by the clinician in the record. This is a much higher concentration of possible AHP patients  
274 than would be expected by chance based on the known prevalence of AHP.

275  
276 Alternate explanations for characteristic AHP symptom profiles were diverse in the patient group  
277 without any mention of porphyria (**Table 6**). Cancers seen in this group included breast, uterine,  
278 pancreatic, cervical, leukemia and adrenal carcinoma. Other common comorbidities and  
279 conditions seen in this group included: fibromyalgia, irritable bowel syndrome, chronic fatigue,  
280 obesity, hypertension, obstructive sleep apnea, and chronic obstructive pulmonary disease. In  
281 contrast, alternate symptom profiles in the group with mention of porphyria in the notes were  
282 dominated by liver pathologies, mostly hepatocellular carcinoma.

283  
284  
285 Patients in the group *without* mention of porphyria in the medical record generally had much  
286 longer and more complicated histories compared to the other group, with 86 out of 100 having  
287 encounters spread over four years or longer. The patients *with* porphyria mentioned in the  
288 clinical notes tended to have shorter, and less complex histories (only 39 out of 100 had over 4  
289 years of encounters), more focused on a single medical issue or set of symptoms, which may  
290 have been due to their being referral to our academic medical center from other health care sites.

291  
292 There were small differences in age summary statistics between the two groups (**Table 7**), but  
293 notably more pediatric patients in the reviewed group with mention of porphyria found in clinical  
294 notes than those without (10 patients vs 1 patient). There were significantly more male patients

295 found in this group too, compared to the group with no mention of porphyria (**Table 8**).  
296 Associated conditions for these 44 male patients were dominated by only a few  
297 diagnoses/symptom patterns: liver disease (N=18), suspicion of porphyria (N=11), or actinic  
298 keratosis (N=3). In contrast, no single condition dominated the male disease distribution in the  
299 patient group without mention of porphyria in the notes.

300

301 About a third of patients in the group *with* mention of porphyria in the clinical notes had some  
302 level of suspicion and work-up for AHP documented. We also identified four patients in this  
303 group that we thought had possibly undiagnosed AHP, without suspicion documented in the  
304 notes. We labeled these patients as *Diagnostic testing likely indicated but AHP not suspected*.  
305 Three of these patients had ‘porphyria’ in their clinical note listed as a standard precaution for  
306 several different medications (hydrochloroquinone, ferrous sulfate), which they were taking. In  
307 fact, about two thirds of the patients with ‘porphyria’ in the clinic notes had other reasons,  
308 besides suspicion of AHP, for the presence of this word (**Table 9**). A large number of these  
309 patients were candidates for liver transplantation. Standard clinical documentation for evaluation  
310 for this procedure included a list of possible causes of liver failure, including protoporphyria.  
311 Porphyria was also mentioned as a precaution for certain medications or treatments given to  
312 some patients in this group, which included hydroxychloroquinone ferrous sulfate, therapeutic  
313 abortion, and UV light therapy for actinic keratosis.

314

## 315 **Discussion**

316 This work identified four likely and 18 possible patients who had no mention of porphyria in  
317 their charts for whom AHP diagnostic testing could be indicated. In addition, four patients who

318 had mention of porphyria in their charts not related to a diagnostic evaluation of the disease were  
319 also found likely to have AHP diagnostic testing indicated. This number of patients with  
320 indications for AHP diagnostic testing and possibly to-be confirmed diagnosis vastly exceeds  
321 that due to chance and surpassed our expectations. It will require clinical follow-up to determine  
322 whether these patients' symptoms are truly due to AHP or not, but the manual record review  
323 clearly demonstrates that our methodology has found patients for whom a spot urine  
324 porphobilinogen test is indicated.

325  
326 Another benefit of identifying such patients is to inform local specialists of the presence of  
327 patients with rare diseases in which they have expertise. An institution-wide search for  
328 confirmed AHP patients through our targeted ICD-10-CM code search plus manual chart review  
329 identified 30 confirmed AHP patients. A majority of these patients were previously unknown to  
330 the porphyria specialist (TD) at OHSU. Identifying rare disease patients through large-scale data  
331 review in this manner can help connect them with the appropriate specialist to ensure optimal  
332 care.

333  
334 Our results strongly suggest that leveraging of EHR data coupled with machine learning can be  
335 an effective method of identifying patients who should receive a diagnostic biochemical test to  
336 screen for AHP. Our automated model was able to identify patients with compelling  
337 constellations of symptoms who had not be previously worked up for porphyria. It was also able  
338 to identify patients for whom porphyria had been considered without direct access to porphyria-  
339 related data elements such as hemin treatment, lab tests specific to AHP, or mention of AHP  
340 diagnosis in clinical notes.

341  
342 This is especially interesting in the light that the overall cross-validation scores of the model on  
343 the data set using the known 30 AHP cases as the positive set and the rest of the data as negative  
344 training samples was not very high, with cross-validation yielding an average AUC = 0.775. This  
345 is certainly a low performance figure compared to other current machine learning tasks such as  
346 publication type identification [24], or facial image recognition [25]. However, these other tasks  
347 are very different from this one due to the extremely rare nature of the positive AIP cases in both  
348 the training data as well as in the actual patient population. In most machine learning research, a  
349 data set is considered skewed or imbalanced if the number of positive cases is much less than  
350 50%. A recent systematic review on imbalanced data classification cites articles investigating  
351 negative to positive case ratios of 100 to 1 as “highly imbalanced” [26, 27]. For problems such as  
352 rare diseases, the imbalance ratio can be nearly 10,000 to 1, as it is here. Lifting the predictive  
353 power to perhaps 22 in 100 manually reviewed cases is a potentially transformative level of  
354 performance.

355  
356 The strongest positive predictors in the model included unexplained abdominal pain, pelvic and  
357 perineal pain, nausea and vomiting, and a number of pain and nausea medications. Frequent  
358 urinalysis was also a strong positive predictive feature, this is likely due to being associated with  
359 frequent ER visits and hospitalizations. The model relied on encoding the frequency of episodes,  
360 and not just binary presence of absence of symptoms. Indirectly, in the model this represented  
361 recurrent, undiagnosed problems consistent with AHP.

362

363 As these methods are general, and not specific to AHP, they should be applicable to other rare  
364 disorders that have a constellation of recurrent symptoms as indicating features. There are likely  
365 ways to improve the machine learning approach, including the use of more advanced features  
366 that represent time, duration, and intervals, explicit coding of symptom separation and overlap,  
367 and more sophisticated machine learning algorithms specifically tailored to situations where the  
368 positive case is extremely rare. Investigation into machine learning algorithms for highly skewed  
369 data such as these is an active area of research [28].

370

### 371 **Conclusion**

372 The combination of large data sets, machine learning techniques, and clinical knowledge  
373 engineering can be a powerful tool to identify patients with undiagnosed rare diseases. The use  
374 case of AHP presented here revealed four undiagnosed patients thought likely to have AHP, as  
375 well as 18 others who would likely benefit from testing. This level of precision in identifying  
376 potential cases of AHP from EHR data is much higher than would be expected by the prevalence  
377 of the disease.

378

379 Analyzing the EHR with advanced techniques such as demonstrated here points to the potential  
380 of the future of digital medicine on a population scale. Advanced approaches enabled by the  
381 wide deployment of the EHR can now be used to improve medicine and medical care in areas  
382 that have been underserved or inaccessible. Health care can be made more proactive, not simply  
383 in terms of common conditions and age or gender related screening, but for rarer conditions as  
384 well.

385



386 We plan to continue this work in several directions. First, an IRB-approved clinical validation  
387 study is being implemented. In this study, we will contact the primary care clinicians (PCP) of  
388 the patients where AHP diagnostic testing was found to be *likely* or *possibly* indicated. We will  
389 inform them that an algorithm based on EHR data has determined that their patient might have  
390 AHP and could benefit from a spot urine porphobilinogen, which is an is inexpensive, non-  
391 invasive and easy to perform diagnostic test. With the agreement of the PCP, we will then  
392 contact patients and offer them the test. Expert clinical consultation will be made available to the  
393 PCP for any questions they have. We will collect data on the interactions with the PCPs, the  
394 number of spot urine porphobilinogen tests administered, as well as the test results. In this  
395 manner, we will be able to study the clinical impact of our rare disease identification approach.

396

397 Second, we will continue to refine our methods. Other machine learning algorithms, such as  
398 random forests and deep learning, may have advantages for AHP and other rare diseases. Other  
399 methods of encoding the EHR data that incorporate embeddings and temporal representations,  
400 have been shown to demonstrate leading-edge results in other fields, such as computer vision,  
401 machine translation, and speech recognition, and may assist with rare diseases.

402

403 Finally, we will extend this methodology to other rare diseases that are difficult to diagnose,  
404 focusing on those for which effective treatments are becoming available. If the timeline for  
405 diagnosing rare conditions can be substantially reduced, there is great potential to impact patient  
406 health in a very significant manner.

407

408 **Acknowledgements and Funding**

409 This work was funded and the associated editorial support was provided by Alnylam  
410 Pharmaceuticals, Inc., Cambridge, MA.

411

412 **Declaration of Interest**

413 Stephen Meninger, John J. Ko, and Jigar Amin, are employees of Alnylam, and Alex Wei was an  
414 employee of Alnylam during his contribution to the manuscript.



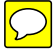

**Table 1.** Electronic Health Record (EHR) document types used in this research.

|                          |
|--------------------------|
| Administered Medications |
| Current Medications      |
| Demographics             |
| Encounter Diagnosis      |
| Hospital Encounters      |
| Lab Results              |
| Medications Ordered      |
| Microbiology Results     |
| Notes                    |
| Problem List             |
| Procedures Ordered       |
| Lab Result Comments      |
| Surgeries                |
| Age                      |

**Table 2.** Electronic Health Record (EHR) document counts of porphyria codes and mentioned in text notes or label tests.

| <b>Code</b>                                         | <b>Total</b>  | <b>Unique</b>  |
|-----------------------------------------------------|--------------------------------------------------------------------------------------------------|---------------------------------------------------------------------------------------------------|
| ICD9 277.1                                          | 3879                                                                                             | 308                                                                                               |
| E80.0 Hereditary erythropoietic porphyria           | 472                                                                                              | 37                                                                                                |
| E80.1 Porphyria cutanea tarda                       | 783                                                                                              | 77                                                                                                |
| E80.20 Unspecified porphyria                        | 2010                                                                                             | 247                                                                                               |
| E80.21 Acute intermittent (hepatic) porphyria       | 1016                                                                                             | 47                                                                                                |
| E80.29 Other porphyria                              | 109                                                                                              | 24                                                                                                |
| E80.4 Gilbert syndrome                              | 3197                                                                                             | 366                                                                                               |
| E80.6 Other disorders of bilirubin metabolism       | 9502                                                                                             | 2308                                                                                              |
| E80.7 Disorder of bilirubin metabolism, unspecified | 75                                                                                               | 58                                                                                                |
| Patients with porphyria mentioned in a lab test:    | 359                                                                                              | 175                                                                                               |
| Searching field NOTE_TEXT for term porphyria:       | 14353                                                                                            | 3012                                                                                              |

**Table 3.** Summary of document types and counts used in the EHR data set for this research.

| Type                     | Patients | Encounters | Records    | Mean   | Median | Max    |
|--------------------------|----------|------------|------------|--------|--------|--------|
| current_medication       | 187,724  | N/A        | 99,602,443 | 530.58 | 89     | 57,406 |
| demographics             | 204,413  | N/A        | 204,413    | 1.00   | 1      | 1      |
| encounter_attributes     | 204,412  | 19,589,057 | 19,589,057 | 95.83  | 43     | 3,335  |
| encounter_diagnoses      | 202,843  | 10,113,657 | 52,295,188 | 257.81 | 69     | 27,215 |
| hospital_encounters      | 145,551  | 1,163,284  | 1,163,284  | 7.99   | 3      | 520    |
| lab_results              | 172,795  | 2,012,185  | 58,386,934 | 337.90 | 84     | 27,384 |
| medications_ordered      | 190,256  | 3,964,120  | 15,155,203 | 79.66  | 23     | 7,041  |
| microbiology_results     | 54,798   | 145,528    | 1,988,429  | 36.29  | 5      | 5,174  |
| notes                    | 204,161  | 10,014,987 | 28,938,900 | 141.75 | 56     | 14,933 |
| problem_list             | 181,221  | N/A        | 1,737,749  | 9.59   | 6      | 204    |
| procedures_ordered       | 198,833  | 5,129,756  | 19,501,225 | 98.08  | 31     | 35,364 |
| result_comments          | 131,104  | 896,896    | 1,542,279  | 11.76  | 4      | 1,765  |
| surgeries                | 44,238   | 78,403     | 83,535     | 1.89   | 1      | 54     |
| vitals                   | 199,971  | 3,500,418  | 18,268,032 | 91.35  | 24     | 9,442  |
| administered_medications | 100,565  | 349,332    | 17,160,858 | 170.64 | 17     | 53,178 |
| ambulatory_encounters    | 204,235  | 12,091,755 | 12,091,755 | 59.21  | 27     | 1,991  |

**Table 4.** Cross-validation performance of the final feature set on the entire data set for ranking the 30 confirmed cases of porphyria higher than the general population. SVM with radial basis function (RBF) kernel and  $\gamma = 0.04$ .

| Metric            | Score |
|-------------------|-------|
| AUC               | 0.775 |
| Average Precision | 0.060 |
| Precision @ 100   | 0.031 |
| Log Loss          | 0.404 |

**Table 5.** Assessment of the likelihood of undiagnosed acute hepatic porphyria based on clinical note symptom documentation. Both groups of 100 reviewed patients are listed.

|                                                    | <b>Acute Hepatic Porphyria?</b>                                       | <b># Patients</b> |
|----------------------------------------------------|-----------------------------------------------------------------------|-------------------|
| <i>No mention of porphyria group<br/>(n=100)</i>   | Diagnostic test is <i>Likely Indicated</i>                            | 4                 |
|                                                    | Diagnostic test is <i>Possibly Indicated</i>                          | 18                |
|                                                    | Diagnostic test is <i>Unlikely Indicated</i>                          | 68                |
| <i>'Porph' in clinical notes group<br/>(n=100)</i> | Deceased                                                              | 10                |
|                                                    | Suspected in chart                                                    | 16                |
|                                                    | Suspected, ruled out in chart                                         | 15                |
|                                                    | Diagnostic test is <i>Possibly Indicated</i> , not suspected in chart | 4                 |
|                                                    | Unlikely based on chart review                                        | 54                |
|                                                    | Diagnosed, documented in chart                                        | 4                 |
|                                                    | Unknown, unable to determine                                          | 1                 |
|                                                    | Deceased                                                              | 6                 |



**Table 6.** Top alternative explanations for AHP symptom profiles seen in both groups of patients. Conditions seen in no more than one patient are not listed.

|                                      | <b>Alternate AHP Symptom Explanation</b>   | <b># Patients</b> |
|--------------------------------------|--------------------------------------------|-------------------|
| <i>No mention of porphyria group</i> | Surgery                                    | 8                 |
|                                      | Inflammatory Bowel Disease                 | 6                 |
|                                      | Cancer                                     | 6                 |
|                                      | Cancer Chemotherapy                        | 5                 |
|                                      | Gallbladder Pathology                      | 4                 |
|                                      | Diabetes                                   | 3                 |
|                                      | Carnitine Palmitoyl Transferase Deficiency | 2                 |
|                                      | Renal                                      | 4                 |
|                                      | Poly Cystic Ovarian Syndrome               | 2                 |
|                                      | Appendicitis                               | 2                 |
|                                      | Mastocytosis                               | 2                 |
|                                      | <i>'Porph' in clinical notes group</i>     | Liver Pathology   |
| Chemotherapy/Drug Side Effects       |                                            | 3                 |
| Mastocytosis                         |                                            | 2                 |

**Table 7.** Age statistics in years for the two patient groups.

|               | <b>NO MENTION OF<br/>PORPHYRIA</b> | <b>'PORPH' IN CLINICAL<br/>NOTES</b> |
|---------------|------------------------------------|--------------------------------------|
| <b>MEDIAN</b> | 51                                 | 54                                   |
| <b>MEAN</b>   | 53                                 | 50                                   |
| <b>MIN</b>    | 8                                  | 6                                    |
| <b>MAX</b>    | 91                                 | 91                                   |

**Table 8.** Sex distribution for the two patient groups.

|               | <b>NO MENTION OF<br/>PORPHYRIA</b> | <b>'POPRH' IN CLINICAL<br/>NOTES</b> |
|---------------|------------------------------------|--------------------------------------|
| <b>MALE</b>   | 25                                 | 44                                   |
| <b>FEMALE</b> | 75                                 | 56                                   |

**Table 9.** Top reasons for the presence of the word ‘porph’ found in the clinical note.

| <i>More Common Reasons for 'Porph' in Clinical Notes</i> | <b># Patients</b> |
|----------------------------------------------------------|-------------------|
| <i>Suspicion of Porphyria</i>                            | 31                |
| <i>Liver Transplant Documentation</i>                    | 30                |
| <i>Porphyria Mentioned in Treatment Precautions</i>      | 18                |
| <i>Porphyria Diagnosis Mentioned in Notes</i>            | 4                 |
| <i>Porphyria Lab Tests Listed for Screening Physical</i> | 3                 |
| <i>Family History of Porphyria</i>                       | 5                 |
| <i>Misspelling</i>                                       | 2                 |

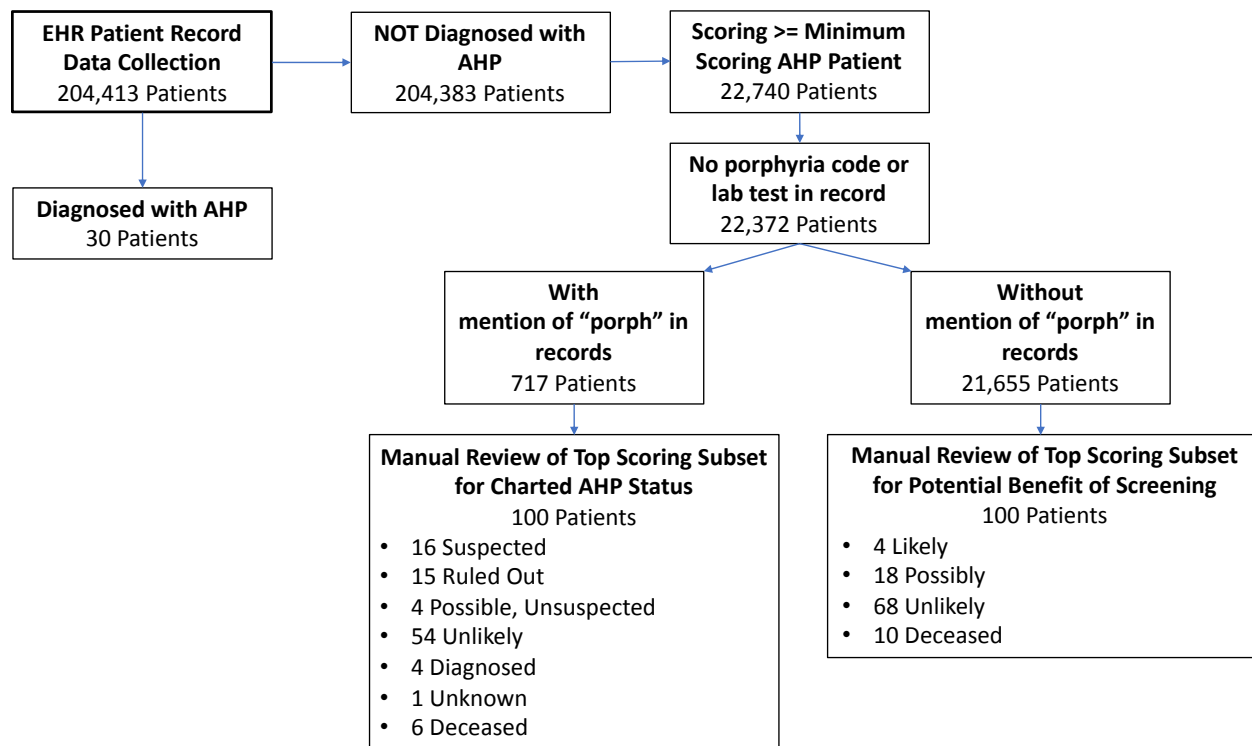

**Figure 1.** Flowchart of patient data record selection. Collection starts from full set of from full collection 204, 413 patient records and is filtered down to two sets of 100 records that were manually reviewed and characterized for 1) present indications for screening for AHP, and 2) status of AHP evaluation in the clinical notes of the record.

**Supplemental  le 1.** Final 146 features selected for inclusion in the machine learning model to predict acute hepatic porphyria.

1. PELVIC\_AND\_PERINEAL\_PAIN\_DX\_ICD10\_NAME
2. MAGNESIUM\_SALTS\_REPLACEMENT\_PHARM\_CLASS\_NAME
3. NGRAM\_atraumatic
4. NGRAM\_pain^severe
5. NAUSEA\_WITH\_VOMITING\_UNSPECIFIED\_DX\_ICD10\_NAME
6. CALCIUM\_REPLACEMENT\_PHARM\_CLASS\_NAME
7. MINERALS\_AND\_ELECTROLYTES\_-  
\_CALCIUM\_REPLACEMENT/VITAMIN\_D\_COMBINATIONS\_PHARM\_SUBC  
LASS\_NAME
8. NGRAM\_compazine
9. DIFFERENTIAL\_PROC\_NAME
10. LAB100107\_PROC\_CODE
11. COPD\_(CHRONIC\_OBSTRUCTIVE\_PULMONARY\_DISEASE)\_(HCC)\_DX\_NA  
ME
12. ELEVATED\_WHITE\_BLOOD\_CELL\_COUNT\_UNSPECIFIED\_DX\_ICD10\_NA  
ME
13. OBSTRUCTIVE\_SLEEP\_APNEA\_(ADULT)\_(PEDIATRIC)\_DX\_ICD10\_NAME
14. NGRAM\_oxycodone
15. NGRAM\_dose^oral
16. PROCHLORPERAZINE\_EDISYLATE\_GENERIC\_NAME\_1
17. NGRAM\_protocol
18. NGRAM\_scoliosis
19. NGRAM\_duloxetine
20. ANTIEMETIC\_- \_PHENOTHIAZINES\_PHARM\_SUBCLASS\_NAME
21. NGRAM\_serquel
22. TOBACCO\_ABUSE\_DX\_NAME
23. HYDROMORPHONE\_HCL\_GENERIC\_NAME\_1
24. OBSTRUCTIVE\_SLEEP\_APNEA\_DX\_NAME
25. NGRAM\_oncology
26. LAB100882\_PROC\_CODE
27. RAINBOW\_HOLD\_TUBE\_- \_BLUE\_TOP\_PROC\_NAME
28. NGRAM\_mouth^twelve
29. DIPHENHYDRAMINE\_HCL\_GENERIC\_NAME\_1
30. NGRAM\_extended^tablet
31. ANTIHISTAMINE\_- \_1ST\_GENERATION\_-  
\_ETHANOLAMINES\_PHARM\_SUBCLASS\_NAME
32. NGRAM\_cigarettes
33. UNSPECIFIED\_ABDOMINAL\_PAIN\_DX\_ICD10\_NAME
34. NGRAM\_fibromyalgia
35. NGRAM\_bipolar
36. # REMOVED NGRAM\_hematology
37. LAB00364\_PROC\_CODE
38. URINE\_MICROSCOPIC\_EXAM\_PROC\_NAME

39. NGRAM\_edisylate]  
40. ANTI-ANXIETY\_-\_BENZODIAZEPINES\_PHARM\_CLASS\_NAME  
41. ALTERNATIVE\_THERAPY\_-  
\_PINEAL\_HORMONE\_AGENTS\_PHARM\_SUBCLASS\_NAME  
42. NGRAM\_4^mg  
43. ONDANSETRON\_HCL\_GENERIC\_NAME\_1  
44. TRNS00039\_PROC\_CODE  
45. PATHOLOGY\_PROC\_NAME  
46. UNSPECIFIED\_ABDOMINAL\_PAIN\_DX\_ICD10\_NAME  
47. RESTLESS\_LEGS\_SYNDROME\_DX\_ICD10\_NAME  
48. TRNS00040\_PROC\_CODE  
49. RADIOLOGY\_PROC\_NAME  
50. NGRAM\_miralax  
51. CONSULT\_TO\_GASTROENTEROLOGY\_PROC\_NAME  
52. CNSLT0031\_PROC\_CODE  
53. NGRAM\_ondansetron  
54. ABDOMINAL\_PAIN\_DX\_NAME  
55. MELATONIN\_GENERIC\_NAME\_1  
56. PINEAL\_HORMONE\_AGENTS\_PHARM\_CLASS\_NAME  
57. TRIPLE\_P04\_CRYSTALS\_COMPONENT\_NAME  
58. NGRAM\_dilaudid  
59. NGRAM\_focal  
60. NGRAM\_nausea^vomiting  
61. NGRAM\_10^olanzapine  
62. NGRAM\_antibiotics  
63. LAB00047\_PROC\_CODE  
64. LIPASE\_PLASMA\_PROC\_NAME  
65. NGRAM\_instructed  
66. LIPASE\_\_(LAB)\_COMPONENT\_NAME  
67. NGRAM\_4^odt  
68. NGRAM\_100^sodium  
69. VOL(URINE)\_PROC\_NAME  
70. LAB100227\_PROC\_CODE  
71. NEUTROPHIL\_#\_COMPONENT\_NAME  
72. LYMPHOCYTE\_#\_COMPONENT\_NAME  
73. MONOCYTE\_#\_COMPONENT\_NAME  
74. EOS\_#\_COMPONENT\_NAME  
75. BASO\_#\_COMPONENT\_NAME  
76. NGRAM\_10^tablet  
77. OXYCODONE\_HCL/ACETAMINOPHEN\_GENERIC\_NAME\_1  
78. NGRAM\_olanzapine  
79. NGRAM\_genitourinary  
80. ANALGESIC\_OPIOID\_OXYCODONE\_COMBINATIONS\_PHARM\_SUBCLASS  
\_NAME  
81. NGRAM\_90^albuterol  
82. NGRAM\_disintegrating

83. ANTICONVULSANT\_-\_GABA\_ANALOGS\_PHARM\_SUBCLASS\_NAME  
84. NGRAM\_risperidone  
85. NGRAM\_0^pramipexole  
86. NORMAL\_RANGE\_COMPONENT\_NAME  
87. # REMOVED HISTAMINE\_H2-  
RECEPTOR\_INHIBITORS\_PHARM\_CLASS\_NAME  
88. # REMOVED GASTRIC\_ACID\_SECRETION\_REDUCERS\_-\_HISTAMINE\_H2-  
RECEPTOR\_ANTAGONISTS\_PHARM\_SUBCLASS\_NAME  
89. NGRAM\_abdominal  
90. NGRAM\_0^tablet  
91. NGRAM\_pramipexole  
92. # REMOVED NGRAM\_17^gram  
93. ABDOMINAL\_PAIN\_UNSPECIFIED\_SITE\_DX\_NAME  
94. NGRAM\_propranolol  
95. NGRAM\_rubs  
96. # REMOVED NGRAM\_infusion  
97. NGRAM\_pathology  
98. NGRAM\_control^pain  
99. NGRAM\_flare  
100. NGRAM\_hydromorphone  
101. CREATININE\_URINE\_CONCENTRATION\_COMPONENT\_NAME  
102. NGRAM\_acute^distress  
103. NGRAM\_sulfonamide  
104. NGRAM\_antibiotics^sulfonamide  
105. NGRAM\_depakote  
106. NGRAM\_melatonin  
107. NGRAM\_abdominal^pain  
108. NGRAM\_gram  
109. NGRAM\_magnesium  
110. FERRITIN\_SERUM\_PROC\_NAME  
111. NGRAM\_odt  
112. NGRAM\_odt^ondansetron  
113. NGRAM\_ambulatory  
114. NGRAM\_phenergan  
115. NGRAM\_flares  
116. NGRAM\_mouth^needed  
117. NGRAM\_glycol^polyethylene  
118. NGRAM\_polyethylene  
119. NGRAM\_glycol  
120. NGRAM\_psychosis  
121. NGRAM\_urine  
122. NGRAM\_docusate^sodium  
123. NGRAM\_docusate  
124. ANTIHISTAMINE\_-\_1ST\_GENERATION\_-\_  
\_PHENOTHIAZINES\_PHARM\_SUBCLASS\_NAME  
125. PROMETHAZINE\_HCL\_GENERIC\_NAME\_1



- 126. NGRAM\_stomach
- 127. NGRAM\_ed
- 128. CREATININEUR(REFERRAL)\_COMPONENT\_NAME
- 129. MISC\_REF\_TEST\_RESULT\_COMPONENT\_NAME
- 130. CBC\_WITH\_DIFFERENTIAL\_PROC\_NAME
- 131. LAB00681\_PROC\_CODE
- 132. NGRAM\_oral^powder
- 133. NGRAM\_powder
- 134. ESSENTIAL\_(PRIMARY)\_HYPERTENSION\_DX\_ICD10\_NAME
- 135. NGRAM\_sulfa
- 136. NGRAM\_severe
- 137. NGRAM\_penicillins
- 138. NGRAM\_gallops
- 139. NGRAM\_vicodin
- 140. MISC\_REF\_TEST\_NAME\_COMPONENT\_NAME
- 141. NGRAM\_latex
- 142. NGRAM\_zofran
- 143. NGRAM\_iv
- 144. NGRAM\_discharged
- 145. NGRAM\_nausea
- 146. NGRAM\_acute

## References

1. Meystre SM, Lovis C, Bürkle T, Tognola G, Budrionis A, and Lehmann CU, *Clinical data reuse or secondary use: current status and potential future progress*, in *Yearbook of Medical Informatics*, Holmes JH, Soualmia LF, and Séroussi B, Editors. 2017. 38-52.
2. Anonymous, *Rare Diseases Act of 2002*. 2002, Public Law 107 - 280, <https://www.govinfo.gov/app/details/PLAW-107publ280>.
3. Haendel M, Vasilevsky N, Unni D, Bologna C, Harris N, Rehm H, et al., *How many rare diseases are there?* Nature Reviews Drug Discovery, 2019. <https://www.nature.com/articles/d41573-019-00180-y>.
4. Garg R, Dong S, Shah S, and Jonnalagadda SR, *A bootstrap machine learning approach to identify rare disease patients from electronic health records*. arXiv.org, 2016: arXiv:1609.01586. <https://arxiv.org/abs/1609.01586>.
5. Colbaugh R, Glass K, Rudolf C, and Tremblay M. *Learning to identify rare disease patients from electronic health records*. AMIA Annual Symposium Proceedings. 2018. San Francisco, CA. 340-347.
6. Shen F, Wang L, and Liu H, *Phenotypic analysis of clinical narratives using human phenotype ontology*. Studies in Health Technology and Informatics, 2017. 245: 581-585.
7. Shen F, Liu S, Wang Y, Wen A, Wang L, and Liu H, *Utilization of electronic medical records and biomedical literature to support the diagnosis of rare diseases using data fusion and collaborative filtering approaches*. JMIR Medical Informatics, 2018. 6(4): e11301. <https://medinform.jmir.org/2018/4/e11301/>.
8. Besur S, Hou W, Schmeltzer P, and Bonkovsky HL, *Clinically important features of porphyrin and heme metabolism and the porphyrias*. Metabolites, 2014. 4: 977-1006.
9. Bissell DM, Anderson KE, and Bonkovsky HL, *Porphyria*. New England Journal of Medicine, 2017. 377: 862-872.
10. Gouya L, Ventura P, Balwani M, Bissell DM, Rees DC, Penz C, et al., *EXPLORE: a prospective, multinational, natural history study of patients with acute hepatic porphyria with recurrent attacks*. Hepatology, 2019: Epub ahead of print.
11. Ramanujam VMS and Anderson KE, *Porphyria diagnostics – Part 1: a brief overview of the porphyrias*. Current Protocols in Human Genetics, 2015. 86: 17.20.1-17.20.26.
12. Szlendak U, Bykowska K, and Lipniacka A, *Clinical, biochemical and molecular characteristics of the main types of porphyria*. Advances in Clinical and Experimental Medicine, 2016. 25: 361-368.
13. Elder G, Harper P, Badminton M, Sandberg S, and Deybach JC, *The incidence of inherited porphyrias in Europe*. Journal of Inherited Metabolic Disease, 2013. 36: 849-857.
14. Bonkovsky HL, Maddukuri VC, Yazici C, Anderson KE, Bissell DM, Bloomer JR, et al., *Acute porphyrias in the USA: features of 108 subjects from Porphyrias Consortium*. American Journal of Medicine, 2014. 127: 1233-1241.
15. Bonkovsky HL, Dixon N, and Rudnick S, *Pathogenesis and clinical features of the acute hepatic porphyrias (AHPs)*. Molecular Genetics and Metabolism, 2019. 128: 213-218.
16. Chen B, Solis-Villa C, Hakenberg J, Qiao W, Srinivasan RR, Yasuda M, et al., *Acute intermittent porphyria: predicted pathogenicity of HMBS variants indicates extremely low penetrance of the autosomal dominant disease*. Human Mutation, 2016. 37: 1215-1222.

17. Anderson KE, Bloomer JR, Bonkovsky HL, JP Kushner, Pierach CA, Pimstone NR, et al., *Recommendations for the diagnosis and treatment of the acute porphyrias*. Annals of Internal Medicine, 2005. 142: 439-450.
18. Pischik E and Kauppinen R, *An update of clinical management of acute intermittent porphyria*. The Application of Clinical Genetics, 2015. 8: 201-214.
19. Anonymous, *PANHEMATIN® (hemin for injection) U.S. Prescribing Information*. Recordati Rare Diseases, 2017: 1-14.
20. Sardh E, Harper P, Balwani M, Stein P, Rees D, Bissell DM, et al., *Phase I trial of an RNA interference therapy for acute intermittent porphyria*. New England Journal of Medicine, 2019. 380: 549-558.
21. Anonymous, *Drug Trials Snapshots: GIVLAARI*. 2019, Food & Drug Administration, <https://www.fda.gov/drugs/drug-approvals-and-databases/drug-trials-snapshots-givlaari>.
22. Cherem JH, Malagon J, and Nellen H, *Cimetidine and acute intermittent porphyria*. Annals of Internal Medicine, 2005. 143: 694-695.
23. Anderson KE, *Porphyrias: An overview*, in *Up To Date* 2019.
24. Cohen AM, Smalheiser NR, McDonagh MS, Yu C, Adams CE, Davis JM, et al., *Automated confidence ranked classification of randomized controlled trial articles: an aid to evidence-based medicine*. Journal of the American Medical Informatics Association, 2015. 22: 707-717.
25. Sun Y, Liang D, Wang X, and Tang X, *Deepid3: Face recognition with very deep neural networks*. arXiv.org, 2015: arXiv:1502.00873. <https://arxiv.org/abs/1502.00873>.
26. Kaur H, Pannu HS, and Malhi AK, *A systematic review on imbalanced data challenges in machine learning: applications and solutions*. ACM Computing Surveys (CSUR), 2019: 79.
27. Dhar S and Cherkassky V, *Development and evaluation of cost-sensitive universum-SVM*. IEEE Transactions on Cybernetics, 2014. 45: 806-818.
28. Haixiang G, Yijing L, Shang J, Mingyun G, Yuanyue H, and Bing G, *Learning from class-imbalanced data: review of methods and applications*. Expert Systems with Applications, 2017. 73: 220-239.
